# Supplementary material for: Investigation on Metabolites in Structural Diversity from the Deep-Sea Sediment-Derived Bacterium Agrococcus sp. SCSIO 52902 and Their Biosynthesis
Source: MDPI journal article supplement (doi:10.3390/md20070431), 2022-06-29

# Supplementary data for

## Investigation on Metabolites in Structural Diversity from The Deep-Sea Sediment-Derived Bacterium *Agrococcus* sp. SCSIO 52902 and Their Biosynthesis

Wenping Ding <sup>1,3</sup>, Yanqun Li <sup>1,3</sup>, Xinpeng Tian <sup>1</sup>, Min Chen <sup>1,3</sup>, Zhihui Xiao

<sup>1</sup>, Rouwen Chen <sup>1</sup>, Hao Yin <sup>1,2,\*</sup>, Si Zhang <sup>1,2,\*</sup>

<sup>1</sup> CAS Key Laboratory of Tropical Marine Bio-resources and Ecology, South China Sea Institute of Oceanology, Chinese Academy of Sciences, Guangzhou 510301, China

<sup>2</sup> Southern Marine Science and Engineering Guangdong Laboratory (Guangzhou), Guangzhou 511458, China

<sup>3</sup> University of Chinese Academy of Sciences, Beijing 100049, China

## Content

|                                                                                                 |    |
|-------------------------------------------------------------------------------------------------|----|
| Table S1 Compositions of eleven liquid media .....                                              | 5  |
| Fig. S1 HPLC analysis profiles of eleven fermentation conditions at 202 nm.....                 | 6  |
| Fig. S2 HPLC analysis profiles of monitoring different time sample in fermenter at 202 nm ..... | 8  |
| Fig. S3 Variation in pH and DO of the large-scale fermentation .....                            | 9  |
| Fig. S4 Sets of fragmentation ions obtained in ESI-MS/MS of compounds 2 and 3 ..                | 10 |
| Fig. S5 HPLC analysis profiles of Marfey's derivatives of 2 at 340 nm .....                     | 11 |
| Fig. S6 HPLC analysis profiles of hydrolysate of 2 at 254 nm .....                              | 12 |
| Fig. S7 HPLC analysis profiles of 3 at 280 nm .....                                             | 12 |
| Table S2 The retention times of Marfey's derivatives of 8 and 10-13 .....                       | 13 |
| Fig. S8 Circular genome map of SCSIO 52902.....                                                 | 13 |
| Table S3 The putative biosynthetic gene clusters from SCSIO 52902 using antiSMASH platform..... | 14 |
| Fig. S9 Partial biosynthetic gene clusters from SCSIO 52902 .....                               | 15 |
| Table S4 The key genes information related to the shikimate and OBS pathway. ....               | 15 |
| Table S5 Inhibition rate against three human tumor cell lines.....                              | 16 |
| Fig. S10 HRESIMS spectrum of compound 1 .....                                                   | 17 |
| Fig. S11 <sup>1</sup> H NMR spectrum (CD <sub>3</sub> OD, 700 MHz) of compound 1 .....          | 18 |
| Fig. S12 <sup>13</sup> C NMR spectrum (CD <sub>3</sub> OD, 176 MHz) of compound 1 .....         | 18 |
| Fig. S13 HSQC spectrum of compound 1 .....                                                      | 19 |
| Fig. S14 HMBC spectrum of compound 1 .....                                                      | 19 |
| Fig. S15 <sup>1</sup> H- <sup>1</sup> H COSY spectrum of compound 1 .....                       | 20 |
| Fig. S16 NOESY spectrum of compound 1 .....                                                     | 20 |

|                                                                                                   |    |
|---------------------------------------------------------------------------------------------------|----|
| Crystallographic data of compound 1 .....                                                         | 21 |
| Fig. S17 UV spectrum of compound 1 .....                                                          | 22 |
| Fig. S18 ECD spectrum of compound 1 .....                                                         | 23 |
| Fig. S19 IR spectrum of compound 1 .....                                                          | 24 |
| Fig. S20 HRESIMS spectrum of compound 2 .....                                                     | 25 |
| Fig. S21 HRESI-MS/MS-positive spectrum of compound 2 .....                                        | 26 |
| Fig. S22 $^1\text{H}$ NMR spectrum ( $\text{CD}_3\text{OD}$ , 700 MHz) of compound 2 .....        | 27 |
| Fig. S23 $^{13}\text{C}$ NMR spectrum ( $\text{CD}_3\text{OD}$ , 176 MHz) of compound 2 .....     | 27 |
| Fig. S24 HSQC spectrum of compound 2 .....                                                        | 28 |
| Fig. S25 HMBC spectrum of compound 2 .....                                                        | 28 |
| Fig. S26 $^1\text{H}$ - $^1\text{H}$ COSY spectrum of compound 2 .....                            | 29 |
| Fig. S27 NOESY spectrum of compound 2 .....                                                       | 29 |
| Fig. S28 UV spectrum of compound 2 .....                                                          | 30 |
| Fig. S29 ECD spectrum of compound 2 .....                                                         | 31 |
| Fig. S30 IR spectrum of compound 2 .....                                                          | 32 |
| Fig. S31 HRESIMS spectrum of compound 3 .....                                                     | 33 |
| Fig. S32 HRESI-MS/MS-positive spectrum of compound 3 .....                                        | 34 |
| Fig. S33 $^1\text{H}$ NMR spectrum ( $\text{CD}_3\text{OD}$ , 700 MHz) of compound 3 (1) .....    | 35 |
| Fig. S34 $^{13}\text{C}$ NMR spectrum ( $\text{CD}_3\text{OD}$ , 176 MHz) of compound 3 (1) ..... | 35 |
| Fig. S35 $^1\text{H}$ NMR spectrum ( $\text{CD}_3\text{OD}$ , 700 MHz) of compound 3 .....        | 36 |
| Fig. S36 $^{13}\text{C}$ NMR spectrum ( $\text{CD}_3\text{OD}$ , 176 MHz) of compound 3 .....     | 36 |
| Fig. S37 HSQC spectrum of compound 3 .....                                                        | 37 |
| Fig. S38 HMBC spectrum of compound 3 .....                                                        | 37 |
| Fig. S39 $^1\text{H}$ - $^1\text{H}$ COSY spectrum of compound 3 .....                            | 38 |
| Fig. S40 NOESY spectrum of compound 3 .....                                                       | 38 |
| Fig. S41 UV spectrum of compound 3 .....                                                          | 39 |
| Fig. S42 IR spectrum of compound 3 .....                                                          | 39 |
| Fig. S43 HRESIMS spectrum of compound 4 .....                                                     | 40 |
| Fig. S44 $^1\text{H}$ NMR spectrum ( $\text{CD}_3\text{Cl}$ , 700 MHz) of compound 4 .....        | 41 |
| Fig. S45 $^{13}\text{C}$ NMR spectrum ( $\text{CD}_3\text{Cl}$ , 176 MHz) of compound 4 .....     | 41 |
| Fig. S46 HSQC spectrum of compound 4 .....                                                        | 42 |
| Fig. S47 HMBC spectrum of compound 4 .....                                                        | 42 |
| Fig. S48 $^1\text{H}$ - $^1\text{H}$ COSY spectrum of compound 4 .....                            | 43 |
| Fig. S49 UV spectrum of compound 4 .....                                                          | 43 |
| Fig. S50 IR spectrum of compound 4 .....                                                          | 44 |
| Fig. S51 HRESIMS spectrum of compound 5 .....                                                     | 45 |
| Fig. S52 $^1\text{H}$ NMR spectrum ( $\text{CD}_3\text{OD}$ , 700 MHz) of compound 5 .....        | 46 |
| Fig. S53 $^{13}\text{C}$ NMR spectrum ( $\text{CD}_3\text{OD}$ , 176 MHz) of compound 5 .....     | 46 |
| Fig. S54 HSQC spectrum of compound 5 .....                                                        | 47 |
| Fig. S55 HMBC spectrum of compound 5 .....                                                        | 47 |
| Fig. S56 $^1\text{H}$ - $^1\text{H}$ COSY spectrum of compound 5 .....                            | 48 |
| Fig. S57 ESI-MS spectrum of compound 6 .....                                                      | 49 |
| Fig. S58 $^1\text{H}$ NMR spectrum ( $\text{CD}_3\text{OD}$ , 500 MHz) of compound 6 .....        | 50 |
| Fig. S59 $^{13}\text{C}$ NMR spectrum ( $\text{CD}_3\text{OD}$ , 126 MHz) of compound 6 .....     | 50 |

|                                                                                          |    |
|------------------------------------------------------------------------------------------|----|
| Crystallographic data of compound 6 .....                                                | 51 |
| Fig. S60 ESI-MS spectrum of compound 7 .....                                             | 51 |
| Fig. S61 <sup>1</sup> H NMR spectrum (CD <sub>3</sub> OD, 500 MHz) of compound 7 .....   | 52 |
| Fig. S62 <sup>13</sup> C NMR spectrum (CD <sub>3</sub> OD, 126 MHz) of compound 7 .....  | 52 |
| Crystallographic data of compound 7 .....                                                | 53 |
| Fig. S63 ESI-MS spectrum of compound 8 .....                                             | 53 |
| Fig. S64 <sup>1</sup> H NMR spectrum (CD <sub>3</sub> OD, 500 MHz) of compound 8 .....   | 54 |
| Fig. S65 <sup>13</sup> C NMR spectrum (CD <sub>3</sub> OD, 126 MHz) of compound 8 .....  | 54 |
| Crystallographic data of compound 8 .....                                                | 55 |
| Fig. S66 ESI-MS spectrum of compound 9 .....                                             | 55 |
| Fig. S67 <sup>1</sup> H NMR spectrum (CD <sub>3</sub> OD, 500 MHz) of compound 9 .....   | 56 |
| Fig. S68 <sup>13</sup> C NMR spectrum (CD <sub>3</sub> OD, 126 MHz) of compound 9 .....  | 56 |
| Crystallographic data of compound 9 .....                                                | 57 |
| Fig. S69 ESI-MS spectrum of compound 10 .....                                            | 57 |
| Fig. S70 <sup>1</sup> H NMR spectrum (CD <sub>3</sub> OD, 700 MHz) of compound 10 .....  | 58 |
| Fig. S71 <sup>13</sup> C NMR spectrum (CD <sub>3</sub> OD, 176 MHz) of compound 10 ..... | 58 |
| Fig. S72 ESI-MS spectrum of compound 11 .....                                            | 59 |
| Fig. S73 <sup>1</sup> H NMR spectrum (CD <sub>3</sub> OD, 700 MHz) of compound 11 .....  | 60 |
| Fig. S74 <sup>13</sup> C NMR spectrum (CD <sub>3</sub> OD, 176 MHz) of compound 11 ..... | 60 |
| Fig. S75 ESI-MS spectrum of compound 12 .....                                            | 61 |
| Fig. S76 <sup>1</sup> H NMR spectrum (CD <sub>3</sub> OD, 700 MHz) of compound 12 .....  | 62 |
| Fig. S77 <sup>13</sup> C NMR spectrum (CD <sub>3</sub> OD, 176 MHz) of compound 12 ..... | 62 |
| Fig. S78 ESI-MS spectrum of compound 13 .....                                            | 63 |
| Fig. S79 <sup>1</sup> H NMR spectrum (CD <sub>3</sub> OD, 700 MHz) of compound 13 .....  | 64 |
| Fig. S80 <sup>13</sup> C NMR spectrum (CD <sub>3</sub> OD, 176 MHz) of compound 13 ..... | 64 |
| Fig. S81 ESI-MS spectrum of compound 14 .....                                            | 65 |
| Fig. S82 <sup>1</sup> H NMR spectrum (CD <sub>3</sub> Cl, 700 MHz) of compound 14 .....  | 66 |
| Fig. S83 <sup>13</sup> C NMR spectrum (CD <sub>3</sub> Cl, 176 MHz) of compound 14 ..... | 66 |
| Fig. S84 ESI-MS spectrum of compound 15 .....                                            | 67 |
| Fig. S85 <sup>1</sup> H NMR spectrum (CD <sub>3</sub> Cl, 700 MHz) of compound 15 .....  | 68 |
| Fig. S86 <sup>13</sup> C NMR spectrum (CD <sub>3</sub> Cl, 176 MHz) of compound 15 ..... | 68 |
| Fig. S87 ESI-MS spectrum of compound 16 .....                                            | 69 |
| Fig. S88 <sup>1</sup> H NMR spectrum (CD <sub>3</sub> OD, 700 MHz) of compound 16 .....  | 70 |
| Fig. S89 <sup>13</sup> C NMR spectrum (CD <sub>3</sub> OD, 176 MHz) of compound 16 ..... | 70 |
| Fig. S90 ESI-MS spectrum of compound 17 .....                                            | 71 |
| Fig. S91 <sup>1</sup> H NMR spectrum (CD <sub>3</sub> OD, 700 MHz) of compound 17 .....  | 72 |
| Fig. S92 <sup>13</sup> C NMR spectrum (CD <sub>3</sub> OD, 176 MHz) of compound 17 ..... | 72 |
| Fig. S93 ESI-MS spectrum of compound 18 .....                                            | 73 |
| Fig. S94 <sup>1</sup> H NMR spectrum (CD <sub>3</sub> OD, 500 MHz) of compound 18 .....  | 74 |
| Fig. S95 <sup>13</sup> C NMR spectrum (CD <sub>3</sub> OD, 126 MHz) of compound 18 ..... | 74 |
| Fig. S96 ESI-MS spectrum of compound 19 .....                                            | 75 |
| Fig. S97 <sup>1</sup> H NMR spectrum (CD <sub>3</sub> OD, 500 MHz) of compound 19 .....  | 76 |
| Fig. S98 <sup>13</sup> C NMR spectrum (CD <sub>3</sub> OD, 126 MHz) of compound 19 ..... | 76 |
| Fig. S99 ESI-MS spectrum of compound 20 .....                                            | 77 |

|                                                                                                 |    |
|-------------------------------------------------------------------------------------------------|----|
| Fig. S100 $^1\text{H}$ NMR spectrum ( $\text{CD}_3\text{OD}$ , 500 MHz) of compound 20 .....    | 78 |
| Fig. S101 $^{13}\text{C}$ NMR spectrum ( $\text{CD}_3\text{OD}$ , 126 MHz) of compound 20 ..... | 78 |
| Fig. S102 ESI-MS spectrum of compound 21 .....                                                  | 79 |
| Fig. S103 $^1\text{H}$ NMR spectrum ( $\text{CD}_3\text{OD}$ , 500 MHz) of compound 21 .....    | 80 |
| Fig. S104 $^{13}\text{C}$ NMR spectrum ( $\text{CD}_3\text{OD}$ , 126 MHz) of compound 21 ..... | 80 |
| Fig. S105 ESI-MS spectrum of compound 22 .....                                                  | 81 |
| Fig. S106 $^1\text{H}$ NMR spectrum ( $\text{CD}_3\text{OD}$ , 700 MHz) of compound 22 .....    | 82 |
| Fig. S107 $^{13}\text{C}$ NMR spectrum ( $\text{CD}_3\text{OD}$ , 176 MHz) of compound 22 ..... | 82 |
| Fig. S108 ESI-MS spectrum of compound 23 .....                                                  | 83 |
| Fig. S109 $^1\text{H}$ NMR spectrum ( $\text{CD}_3\text{OD}$ , 500 MHz) of compound 23 .....    | 84 |
| Fig. S110 $^{13}\text{C}$ NMR spectrum ( $\text{CD}_3\text{OD}$ , 126 MHz) of compound 23 ..... | 84 |
| Fig. S111 Integrated cluster-node diagram of Molecular Networking .....                         | 85 |



**Table S1** Compositions of eleven liquid media

| Media    | Compositions                                                                                                                                                                                                                                                                                          |
|----------|-------------------------------------------------------------------------------------------------------------------------------------------------------------------------------------------------------------------------------------------------------------------------------------------------------|
| 1 mA     | Glucose (10 g/L), Yeast extract (5 g/L), Soluble starch (12 g/L), Bacterial peptone (5 g/L), NaCl (4 g/L), KH <sub>2</sub> PO <sub>4</sub> (0.5 g/L), MgSO <sub>4</sub> •7H <sub>2</sub> O (0.5 g/L), CaCO <sub>3</sub> (2 g/L), Sea salt (30 g/L).                                                   |
| 2 mK     | Yeast extract (2 g/L), Bacterial peptone (2 g/L), Glucose (2 g/L), Mannitol (3 g/L), Malt extract (5 g/L), Peptone from soybean (5 g/L), Soluble starch (5 g/L), Sea salt (30 g/L).                                                                                                                   |
| 3 m2216E | 2216E (37.4 g/L), Glucose (15 g/L), Sea salt (30 g/L).                                                                                                                                                                                                                                                |
| 4 mAm2ab | Soluble starch (5 g/L), Peptone from soybean (5 g/L), Glucose (20 g/L), Yeast extract (2 g/L), Bacterial peptone (2 g/L), KH <sub>2</sub> PO <sub>4</sub> (1 g/L), MgSO <sub>4</sub> •7H <sub>2</sub> O (0.5 g/L), CaCO <sub>3</sub> (2 g/L), Sea salt (30 g/L).                                      |
| 5 mBHI   | BHI broth (38.5 g/L), Sea salt (30 g/L).                                                                                                                                                                                                                                                              |
| 6 mISP2  | Yeast extract (4 g/L), Malt extract (10 g/L), Glucose (4 g/L), Sea salt (30 g/L).                                                                                                                                                                                                                     |
| 7 mISP4  | Soluble starch (10 g/L), KH <sub>2</sub> PO <sub>4</sub> (2 g/L), MgSO <sub>4</sub> •7H <sub>2</sub> O (1 g/L), NaCl (1 g/L), (NH <sub>4</sub> ) <sub>2</sub> SO <sub>4</sub> (2 g/L), CaCO <sub>3</sub> (3 g/L), TS (1 mL/L), Yeast extract (0.5 g/L), Bacterial peptone (1 g/L), Sea salt (30 g/L). |
| 8 mRA    | Soluble starch (20 g/L), Glucose (10 g/L), Malt extract (10 g/L), Maltose (10 g/L), Corn steep liquor (5 g/L), CaCO <sub>3</sub> (2 g/L), Sea salt (30 g/L).                                                                                                                                          |
| 9 mJNP1A | Soluble starch (20 g/L), Peptone of fish powder (2 g/L), Trehalose Dihydrate (2 g/L), Beef extract (3 g/L), Sea salt (30 g/L).                                                                                                                                                                        |
| 10 mM20  | Soybean flour (15 g/L), Soluble starch (20 g/L), Yeast extract (5 g/L), Bacterial peptone (2 g/L), NaCl (4 g/L), CaCO <sub>3</sub> (2 g/L), Sea salt (30 g/L).                                                                                                                                        |
| 11 mMCQ1 | Soluble starch (10 g/L), Glucose (10 g/L), Bacterial peptone (5 g/L), Yeast extract (3 g/L), Beef extract (2 g/L), KH <sub>2</sub> PO <sub>4</sub> (0.5 g/L), MgSO <sub>4</sub> •7H <sub>2</sub> O (0.5 g/L), KBr (1 g/L), CaCO <sub>3</sub> (2 g/L), Sea salt (30 g/L).                              |

TS: Trace salts solution, FeSO<sub>4</sub>•7H<sub>2</sub>O 0.1 g, MnCl<sub>2</sub>•4H<sub>2</sub>O 0.1 g, ZnSO<sub>4</sub>•7H<sub>2</sub>O 0.1 g, in H<sub>2</sub>O 100 mL.

**Fig. S1** HPLC analysis profiles of eleven fermentation conditions at 202

nm

**Experimental group**

1 mA

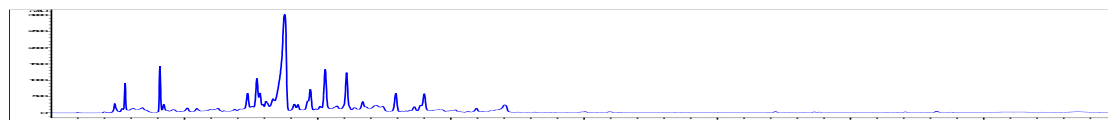

2 mK

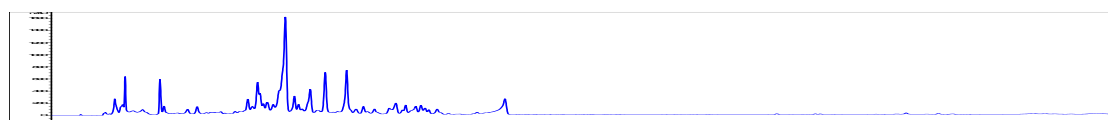

3 m2216E

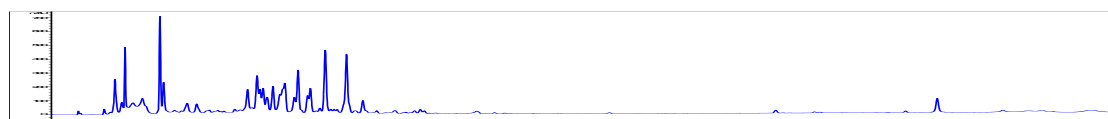

4 mAm2ab

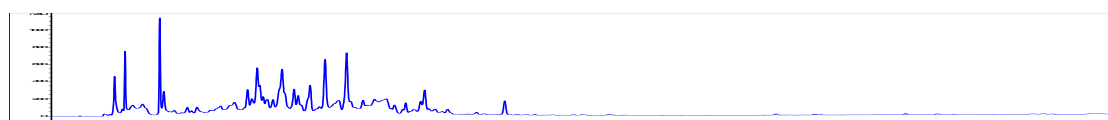

5 mBHI

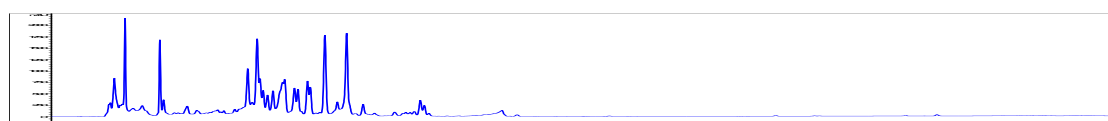

6 mISP2

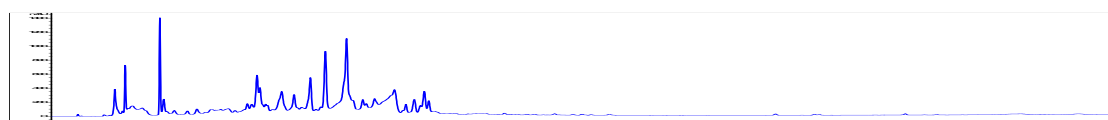

7 mISP4

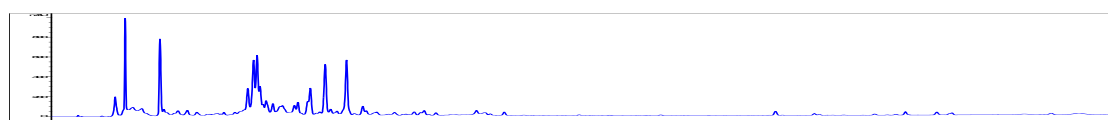

8 mRA

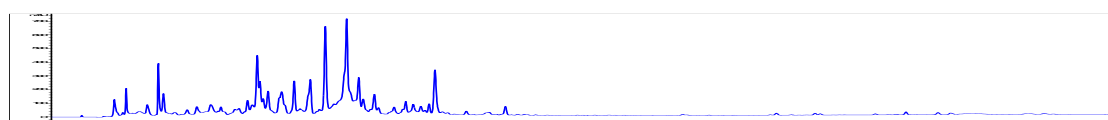

9 mJNP1A

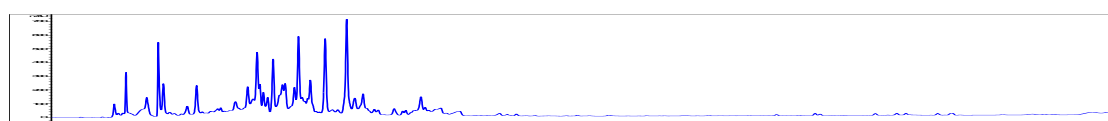

10 mM20

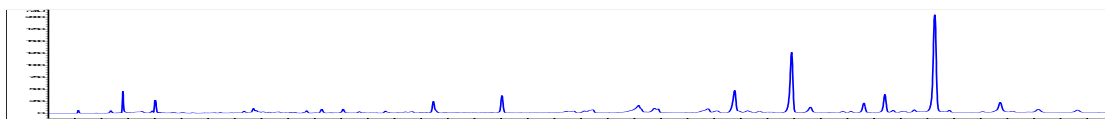

11 mMCQ1

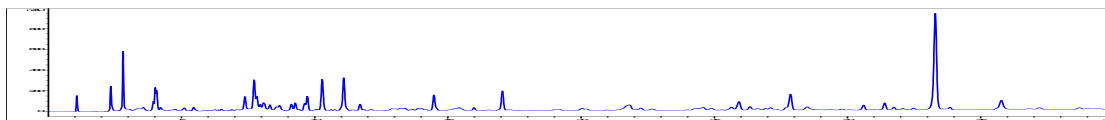

**Blank group**

1 mA

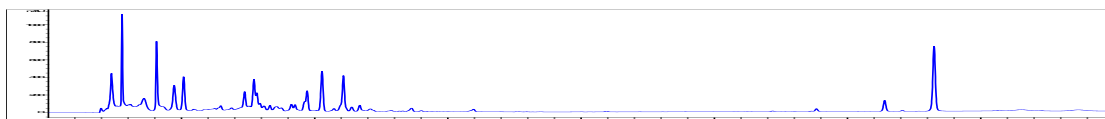

2 mK

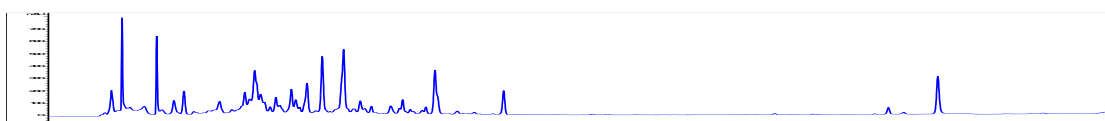

3 m2216E

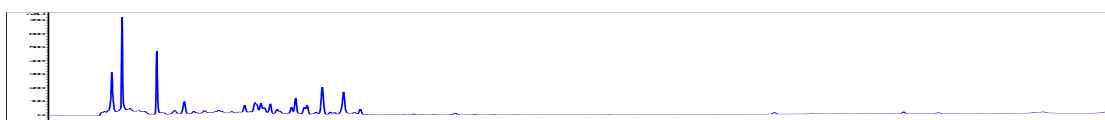

4 mAm2ab

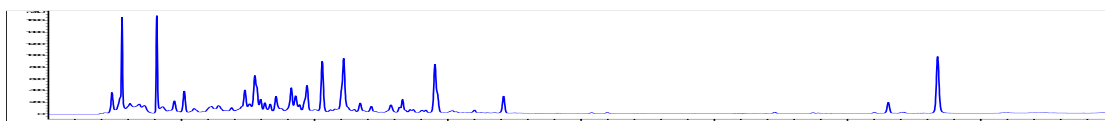

5 mBHI

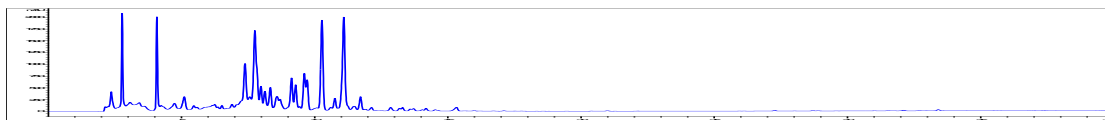

6 mISP2

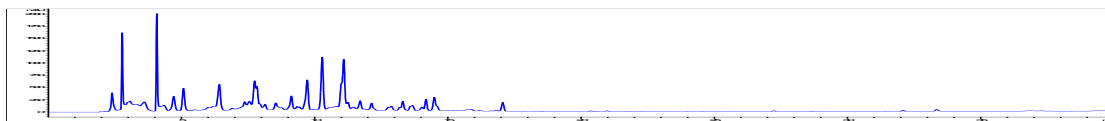

7 mISP4

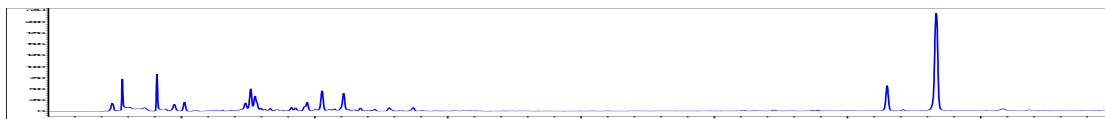

8 mRA

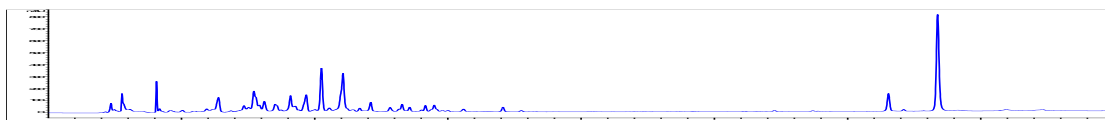

9 mJNP1A

10 mM20

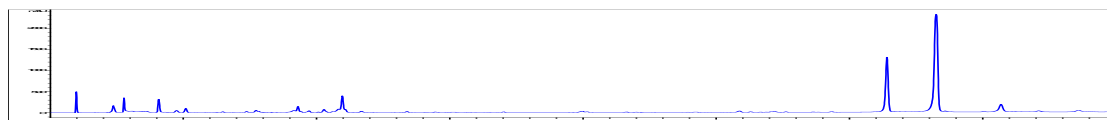

11 mMCQ1

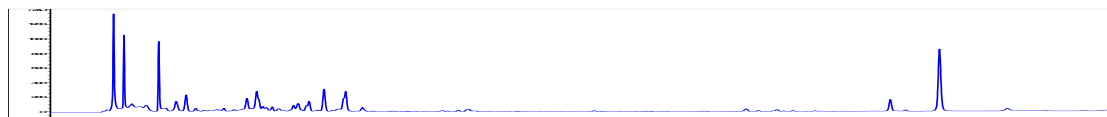

**Fig. S2** HPLC analysis profiles of monitoring different time sample in fermenter at 202 nm

23 h

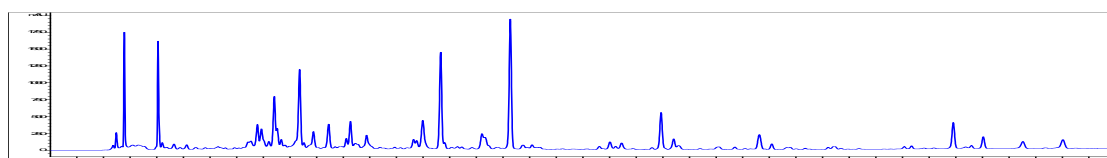

48 h

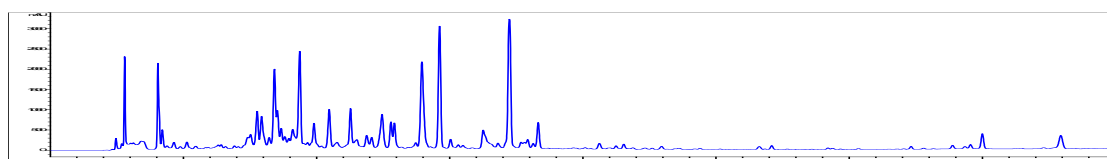

72 h

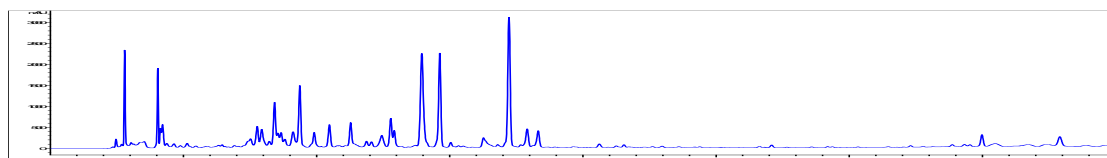

96 h

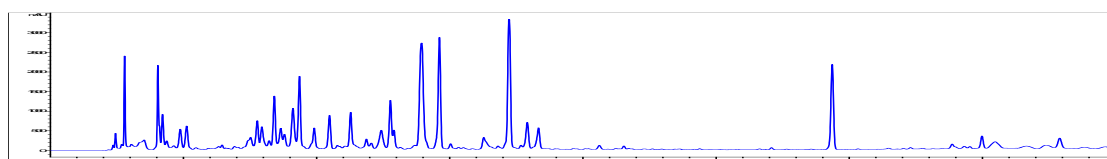

115 h

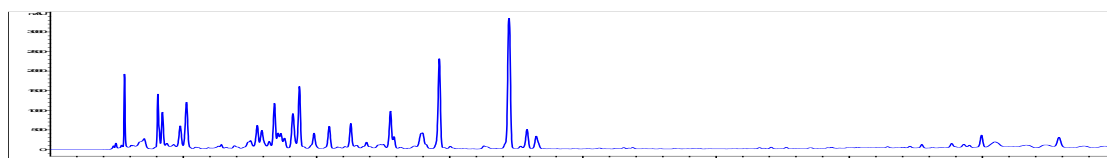

**Fig. S3** Variation in pH and DO of the large-scale fermentation

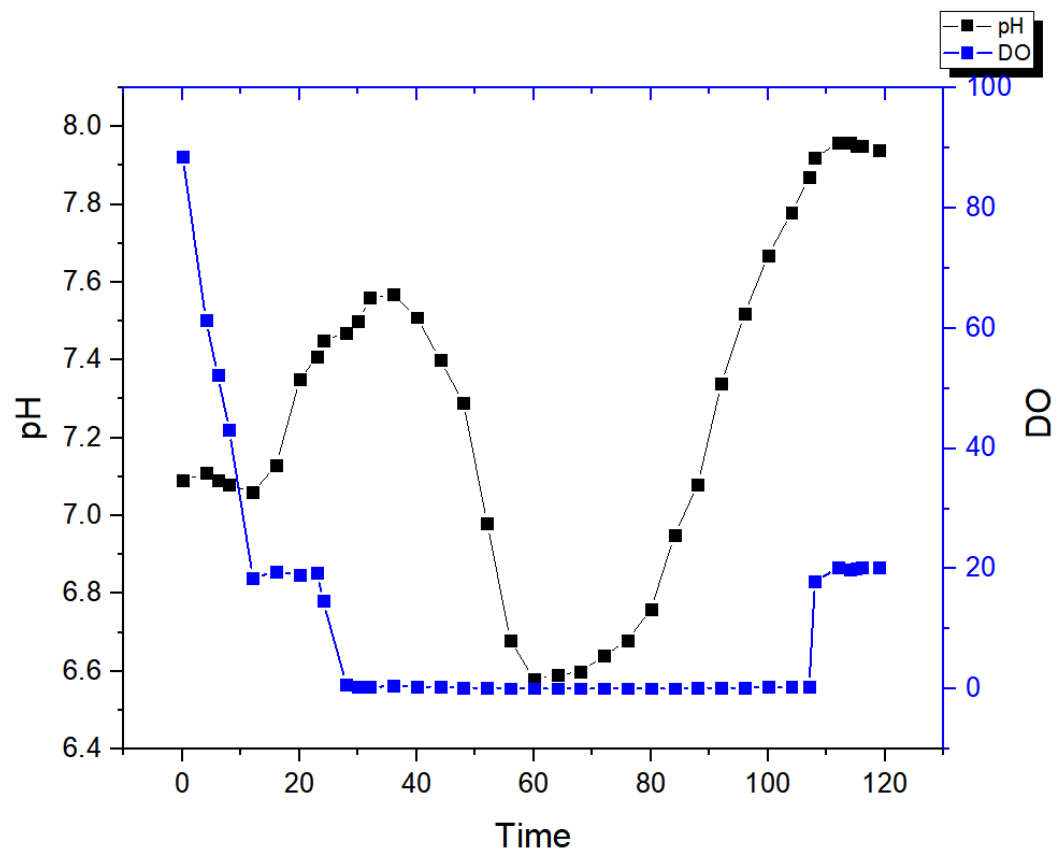

**Fig. S4** Sets of fragmentation ions obtained in ESI-MS/MS of compounds **2** and **3**

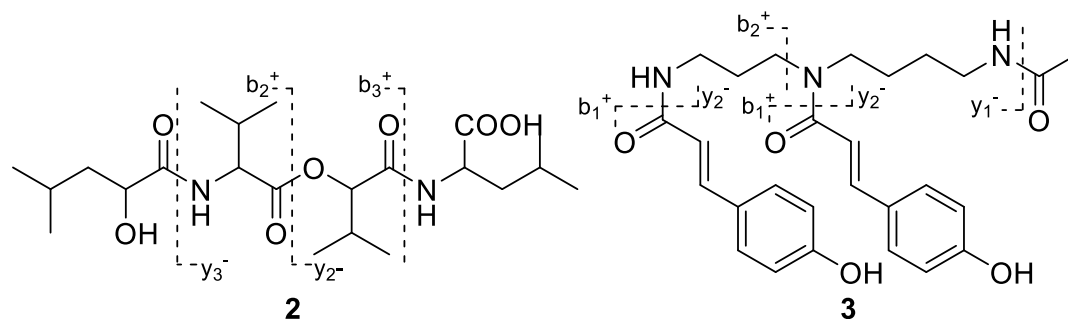

| <b>2</b>           |            | <b>3</b>              |            |
|--------------------|------------|-----------------------|------------|
| fragmentation ions | <i>m/z</i> | fragmentation ions    | <i>m/z</i> |
| precursor          | 445.2818   | precursor             | 480.2358   |
| $b_2^+$            | 214.14     | $b_1^+$               | 147.04     |
| $[b_2-CO]^+$       | 186.15     | $b_2^+$               | 204.1      |
| $b_3^+$            | 314.2      | $[y_2+2H]^+$          | 334.21     |
| $[y_2+2H]^+$       | 232.16     | $[y_2+2H-H_2O]^+$     | 316.2      |
| $[y_3+2H]^+$       | 331.22     | $[y_2+3H-b_1]^+$      | 188.18     |
|                    |            | $[y_1+3H-b_1-NH_3]^+$ | 275.18     |

**Fig. S5** HPLC analysis profiles of Marfey's derivatives of **2** at 340 nm

Marfey's derivatives of **2**

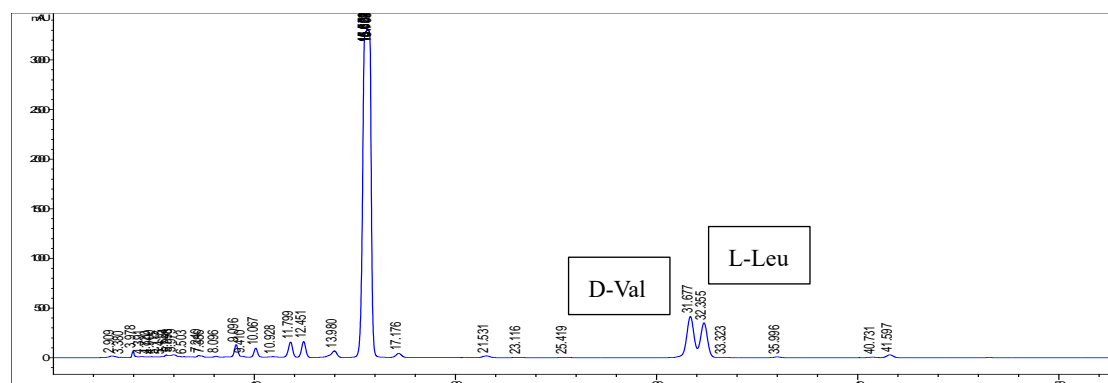

L-FDAA

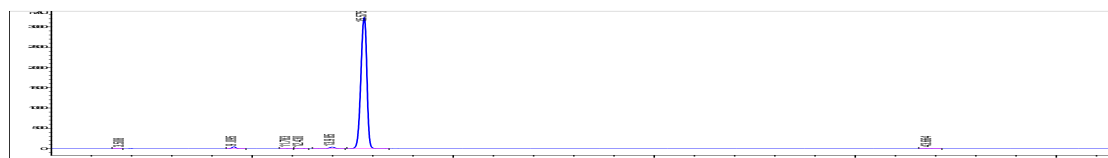

**Fig. S6** HPLC analysis profiles of hydrolysate of **2** at 254 nm

Hydrolysate of **2**

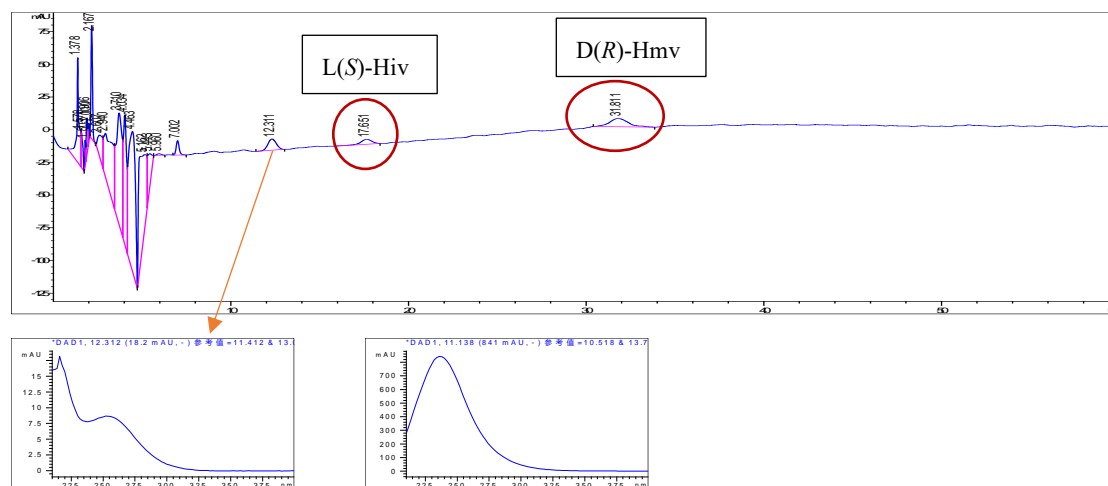

Four standard  $\alpha$ -hydroxy acids

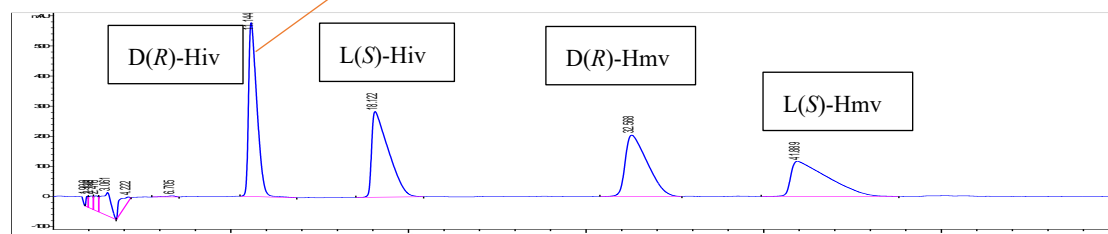

**Fig. S7** HPLC analysis profiles of **3** at 280 nm

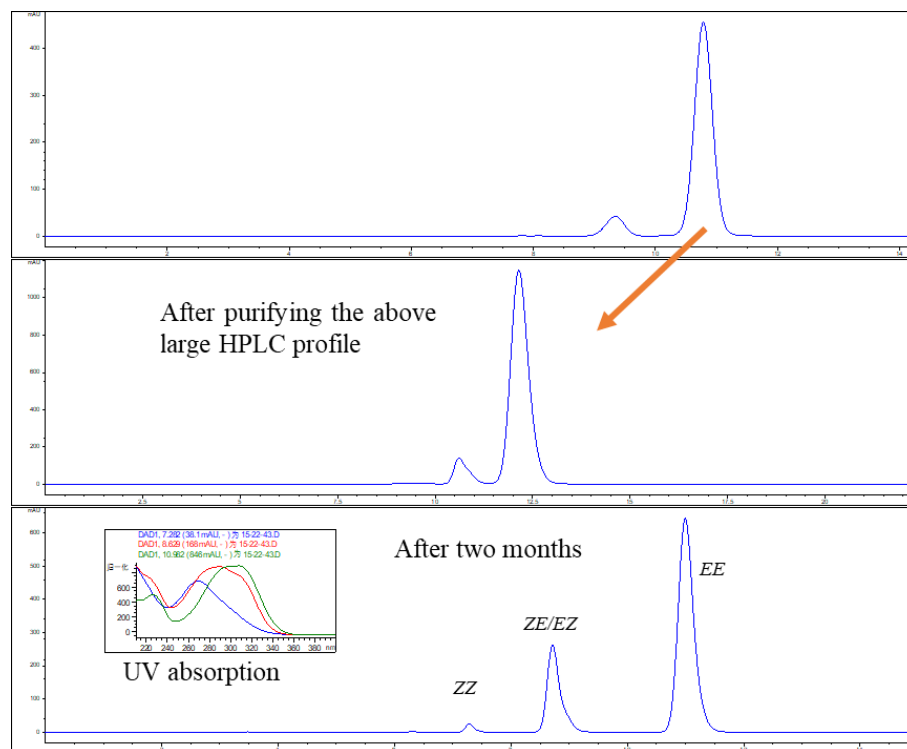

Using different analysis conditions



**Table S2** The retention times of Marfey's derivatives of **8** and **10-13**

| Sample    | tr <sub>L</sub> <sup>a</sup> |        |        |        |        |        |
|-----------|------------------------------|--------|--------|--------|--------|--------|
|           | Pro                          | Ala    | Val    | Phe    | Ile    | Leu    |
| standard  | 25.277                       | 21.721 | 33.574 | 44.178 | 40.167 | 41.202 |
| <b>8</b>  | 12.309 <sup>d</sup>          |        |        |        |        | 41.156 |
| <b>10</b> |                              |        |        |        | 40.049 |        |
| <b>11</b> | 12.137 <sup>d</sup>          |        |        |        | 40.052 |        |
| <b>12</b> |                              | 21.243 |        |        | 40.077 |        |
| <b>13</b> |                              |        | 33.036 | 43.545 |        |        |

| Sample    | tr <sub>D</sub> <sup>b</sup> |        |        |        |        |        | tr <sup>c</sup> |
|-----------|------------------------------|--------|--------|--------|--------|--------|-----------------|
|           | Pro                          | Ala    | Val    | Phe    | Ile    | Leu    | L-FDAA          |
| standard  | 27.718                       | 37.388 | 40.945 | 49.916 | 47.595 | 47.926 | 25.648          |
| <b>8</b>  |                              |        |        |        |        |        | 25.532          |
| <b>10</b> | 27.18                        |        |        |        |        |        | 25.286          |
| <b>11</b> |                              |        |        |        |        |        | 25.311          |
| <b>12</b> |                              |        |        |        |        |        | 25.332          |
| <b>13</b> |                              |        |        |        |        |        | 25.386          |

<sup>a</sup> The retention times of L-amino acid derivatives. <sup>b</sup> The retention times of D- L-amino acid derivatives. <sup>c</sup> The retention time of L-FDAA. <sup>d</sup> The retention time of 3(*R*)-OH-Pro derivative.

**Fig. S8** Circular genome map of SCSIO 52902

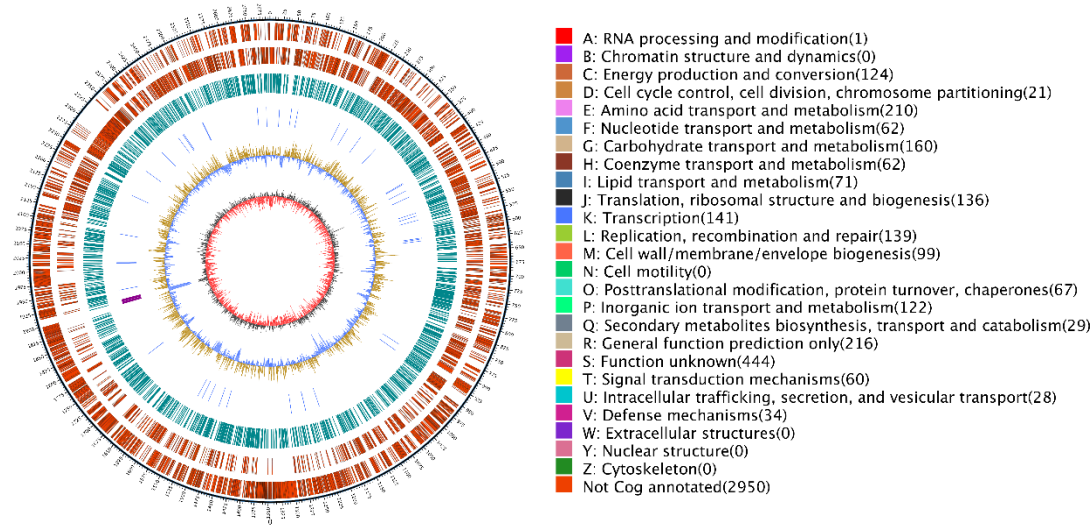

**Table S3** The putative biosynthetic gene clusters from SCSIO 52902 using antiSMASH platform

| Settings                                       | Regions | Types                       | Location                 | Total     |
|------------------------------------------------|---------|-----------------------------|--------------------------|-----------|
| with the<br>“relaxed<br>strictness”<br>setting | 1.1     | terpene                     | 839,348 - 860,262 nt     | 20,915 nt |
|                                                | 1.2     | T3PKS                       | 1,327,415 - 1,368,557 nt | 41,143 nt |
|                                                | 1.3     | oligosaccharide             | 1,548,516 - 1,600,123 nt | 51,608 nt |
|                                                | 1.4     | betalactone                 | 1,949,843 - 1,976,478 nt | 26,636 nt |
|                                                | 1.5     | redox-cofactor              | 2,027,514 - 2,055,420 nt | 27,907 nt |
| with the<br>“loose<br>strictness”<br>setting   | 2.1     | saccharide                  | 3 - 21,446 nt            | 21,444 nt |
|                                                | 2.2     | saccharide, fatty_acid      | 247,226 - 289,189 nt     | 41,964 nt |
|                                                | 2.3     | saccharide                  | 314,706 - 377,916 nt     | 63,211 nt |
|                                                | 2.4     | saccharide                  | 398,747 - 420,622 nt     | 21,876 nt |
|                                                | 2.5     | saccharide                  | 485,313 - 527,212 nt     | 41,900 nt |
|                                                | 2.6     | saccharide                  | 528,766 - 565,722 nt     | 36,957 nt |
|                                                | 2.7     | saccharide                  | 669,928 - 691,728 nt     | 21,801 nt |
|                                                | 2.8     | terpene                     | 839,348 - 860,262 nt     | 20,915 nt |
|                                                | 2.9     | saccharide                  | 977,063 - 1,009,209 nt   | 32,147 nt |
|                                                | 2.10    | saccharide                  | 1,217,315 - 1,244,224 nt | 26,910 nt |
|                                                | 2.11    | T3PKS                       | 1,327,415 - 1,368,557 nt | 41,143 nt |
|                                                | 2.12    | saccharide                  | 1,437,602 - 1,498,602 nt | 61,001 nt |
|                                                | 2.13    | saccharide, oligosaccharide | 1,544,536 - 1,600,123 nt | 55,588 nt |
|                                                | 2.14    | betalactone, saccharide     | 1,949,843 - 1,992,667 nt | 42,825 nt |
|                                                | 2.15    | redox-cofactor              | 2,027,514 - 2,055,420 nt | 27,907 nt |
|                                                | 2.16    | saccharide                  | 2,168,764 - 2,231,223 nt | 62,460 nt |
|                                                | 2.17    | fatty_acid                  | 2,413,831 - 2,436,419 nt | 22,589 nt |
|                                                | 2.18    | saccharide                  | 2,537,533 - 2,567,647 nt | 30,115 nt |
|                                                | 2.19    | saccharide                  | 2,599,638 - 2,652,795 nt | 53,158 nt |

**Fig. S9** Partial biosynthetic gene clusters from SCSIO 52902

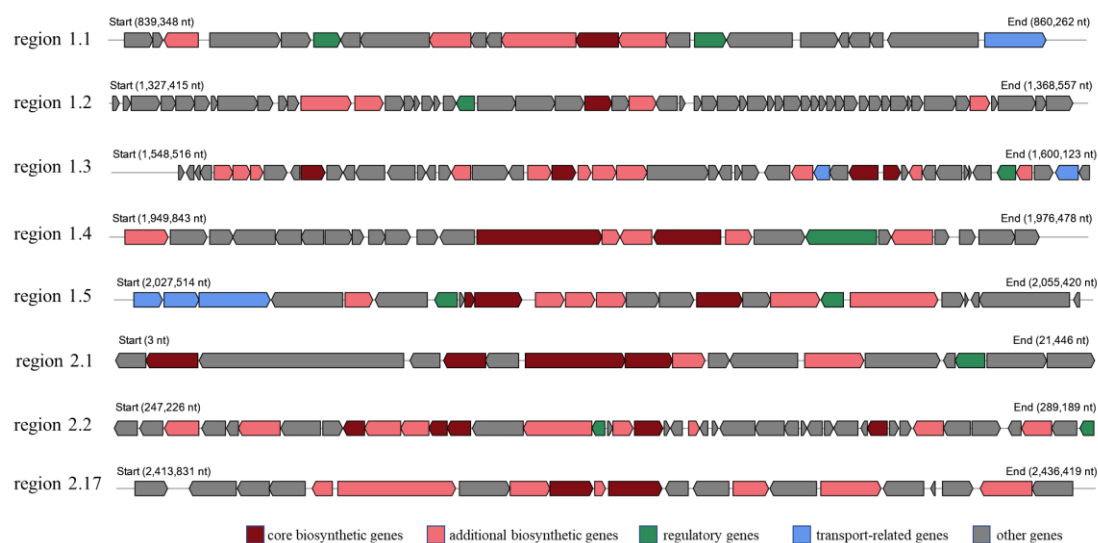

**Table S4** The key genes information related to the shikimate and OBS pathway.

| Gene | Orientation | Location                     | Swissprot_target_ID | E-value   | Identity | Cover  |
|------|-------------|------------------------------|---------------------|-----------|----------|--------|
| aroH | (+)         | 1967385-1968767<br>(1383 nt) | P80574(AROF_STRCO)  | 3.00E-157 | 61.24%   | 94.57% |
| aroB | (-)         | 2329535-2328474<br>(1062 nt) | Q6AF95(AROB_LEIXX)  | 1.00E-128 | 65.72%   | 99.43% |
| aroK | (-)         | 2330095-2329556<br>(540 nt)  | Q9KXQ5(AROK_STRCO)  | 8.30E-23  | 45.45%   | 83.24% |
| aroC | (-)         | 2331279-2330092<br>(1188 nt) | A5CRZ1(AROC_CLAM3)  | 2.20E-169 | 77.92%   | 99.49% |
| aroE | (-)         | 2332133-2331282<br>(852 nt)  | Q39VU8(AROE_GEOMG)  | 8.30E-17  | 40.11%   | 61.84% |
| trpG | (-)         | 928266-927607<br>(660 nt)    | P9WN34(TRPG_MYCTO)  | 2.20E-57  | 58.08%   | 88.58% |
| pchA | (+)         | 564511-565722<br>(1212 nt)   | Q51508(PCHA_PSEAE)  | 5.60E-35  | 31.84%   | 89.58% |
| menD | (-)         | 570394-568727<br>(1668 nt)   | Q6AHC2(MEND_LEIXX)  | 1.90E-118 | 48.48%   | 98.38% |
| menC | (+)         | 579653-580621<br>(969 nt)    | A0QRG0(MENC_MYCS2)  | 7.60E-83  | 57.78%   | 97.52% |
| menE | (-)         | 574492-573491<br>(1002 nt)   | P9WQ38(MENE_MYCTO)  | 7.20E-36  | 35.03%   | 90.09% |
| menB | (-)         | 575427-574528<br>(900 nt)    | A0QRD3(MENB_MYCS2)  | 6.30E-124 | 74.33%   | 97.99% |

**Table S5** Inhibition rate against three human tumor cell lines

| Compounds | Inhibition rate (30 $\mu$ M) |         |         |
|-----------|------------------------------|---------|---------|
|           | A-549                        | HL-60   | HCT-116 |
| <b>1</b>  | 3.93%                        | -2.36%  | 2.00%   |
| <b>2</b>  | 3.24%                        | -10.65% | 1.42%   |
| <b>3</b>  | 2.79%                        | -1.82%  | 5.74%   |
| <b>4</b>  | 1.84%                        | 2.63%   | 1.14%   |
| <b>5</b>  | 24.01%                       | 77.12%  | 5.34%   |
| <b>6</b>  | 3.65%                        | 4.42%   | 1.72%   |
| <b>7</b>  | 3.25%                        | 1.38%   | 0.97%   |
| <b>8</b>  | 4.24%                        | 3.54%   | 1.07%   |
| <b>9</b>  | 7.17%                        | -1.55%  | 0.82%   |
| <b>10</b> | 8.02%                        | -1.38%  | 1.05%   |
| <b>11</b> | -0.88%                       | -1.61%  | 2.41%   |
| <b>12</b> | -2.04%                       | -2.89%  | 0.48%   |
| <b>13</b> | -1.37%                       | -1.67%  | 1.60%   |
| <b>14</b> | -1.22%                       | -3.48%  | -0.09%  |
| <b>15</b> | -1.98%                       | -6.37%  | 1.62%   |
| <b>16</b> | -2.63%                       | 5.86%   | -0.40%  |
| <b>17</b> | -1.59%                       | -7.34%  | -3.47%  |

Fig. S10 HRESIMS spectrum of compound 1

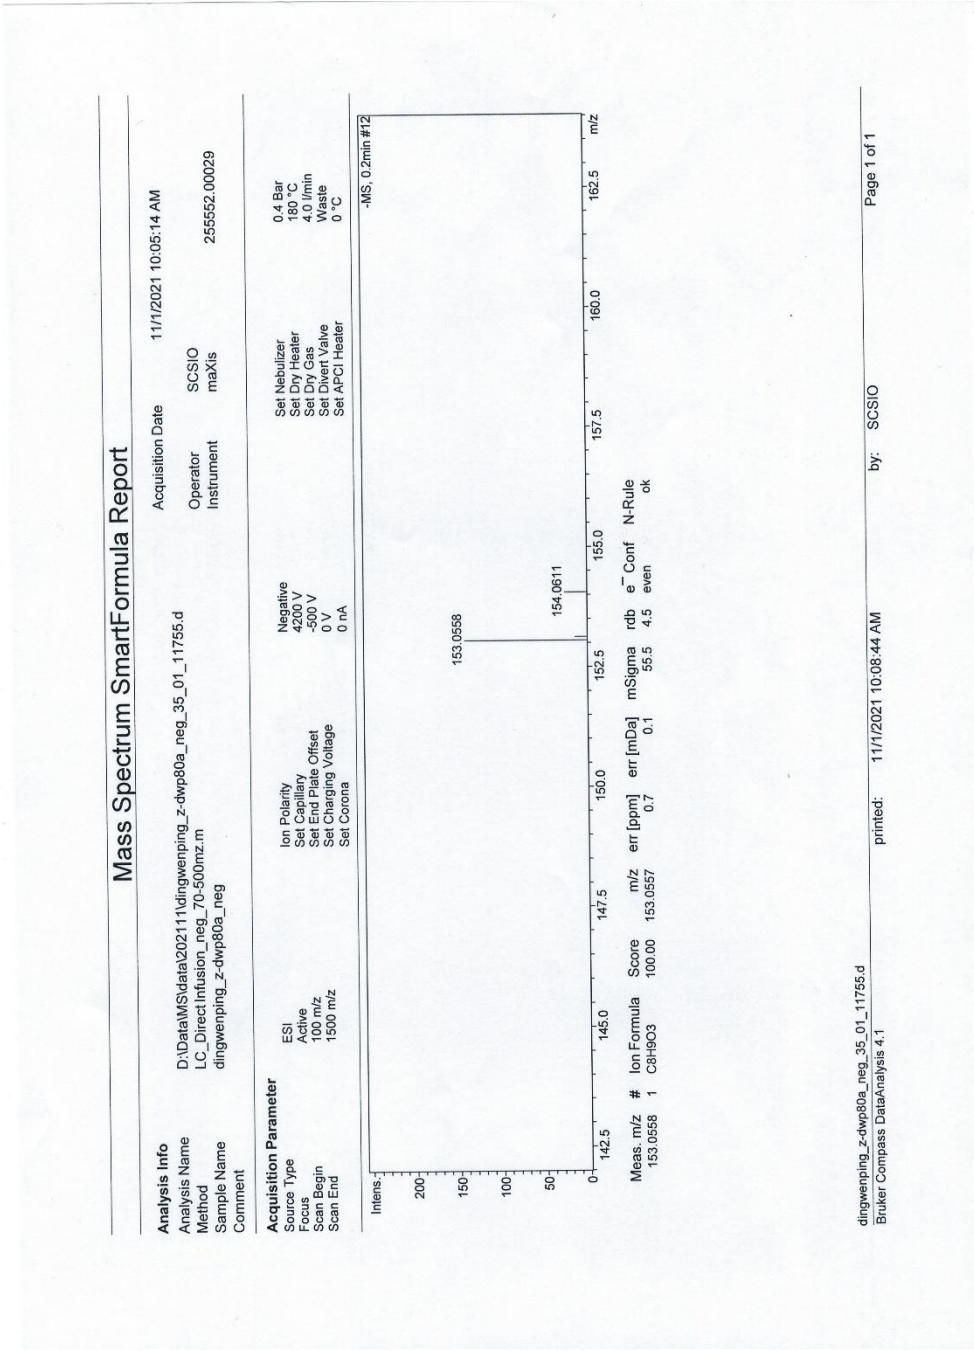

**Fig. S11**  $^1\text{H}$  NMR spectrum ( $\text{CD}_3\text{OD}$ , 700 MHz) of compound **1**

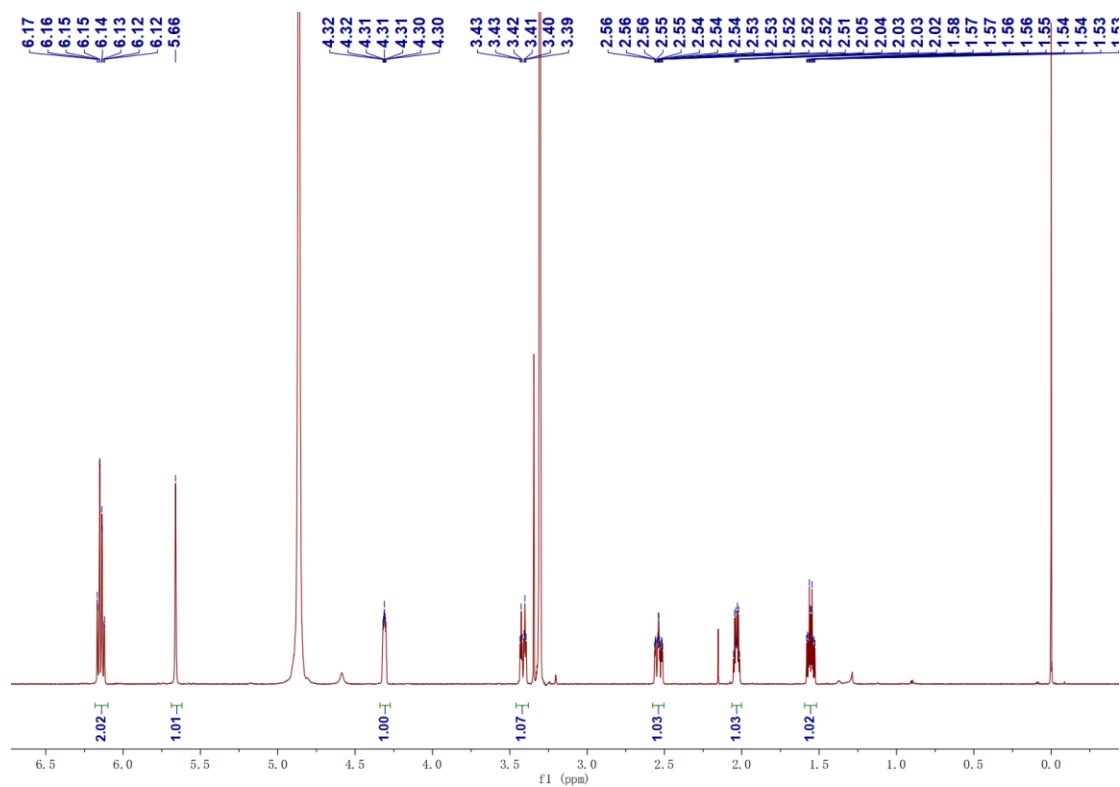

**Fig. S12**  $^{13}\text{C}$  NMR spectrum ( $\text{CD}_3\text{OD}$ , 176 MHz) of compound **1**

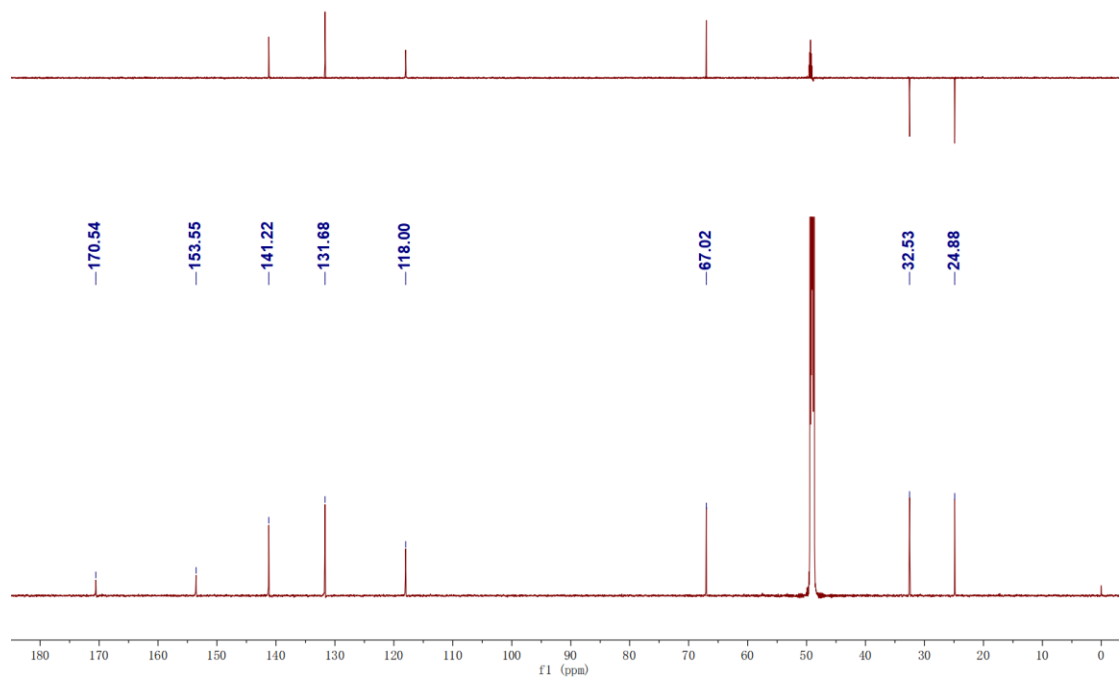

**Fig. S13** HSQC spectrum of compound **1**

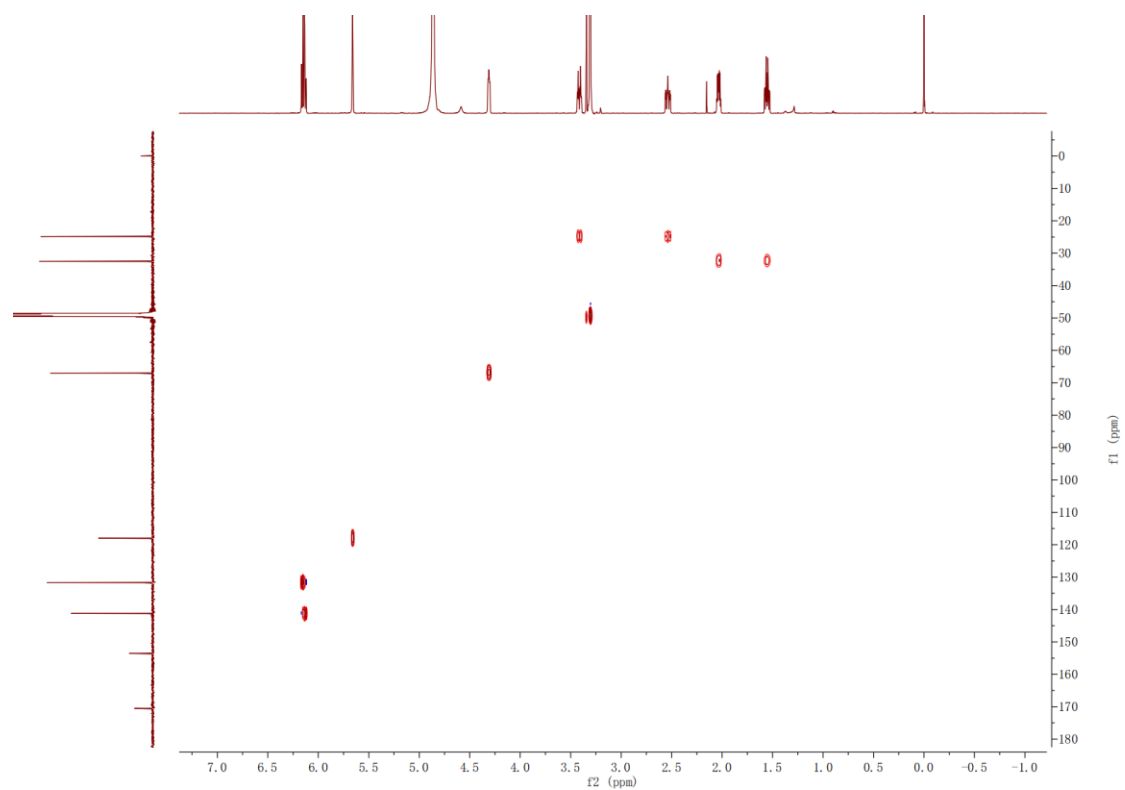

**Fig. S14** HMBC spectrum of compound **1**

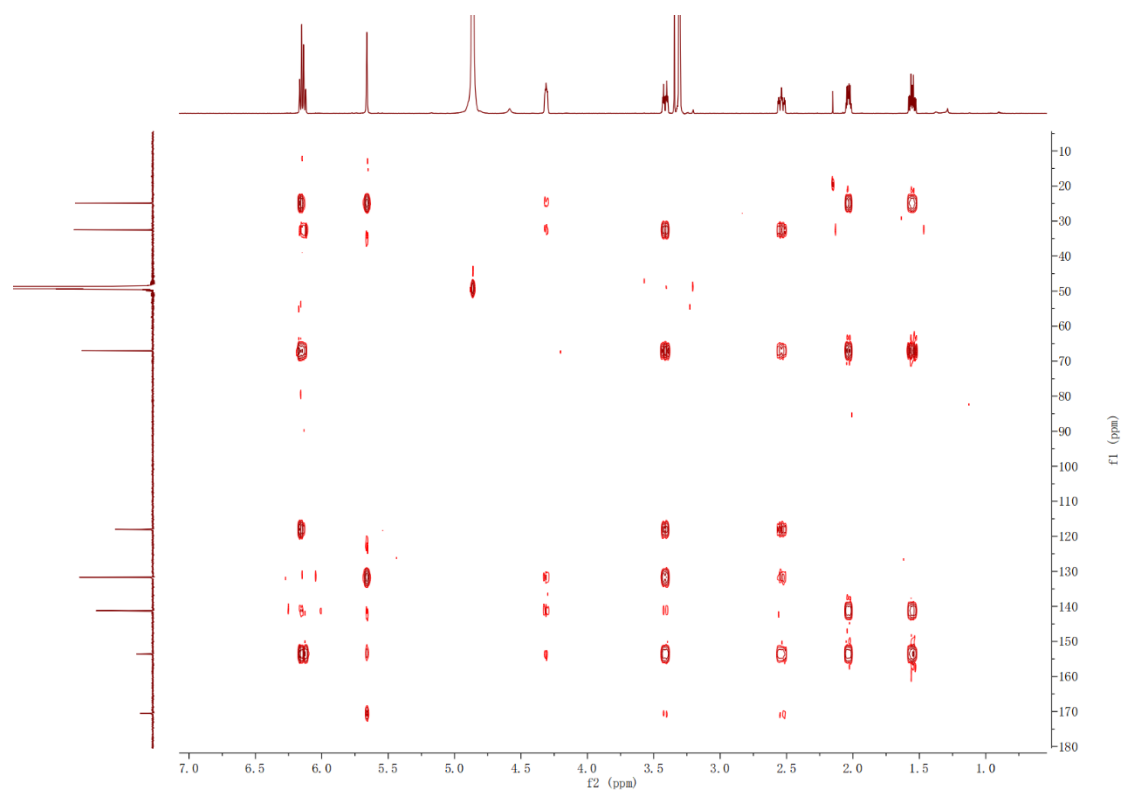

**Fig. S15**  $^1\text{H}$ – $^1\text{H}$  COSY spectrum of compound **1**

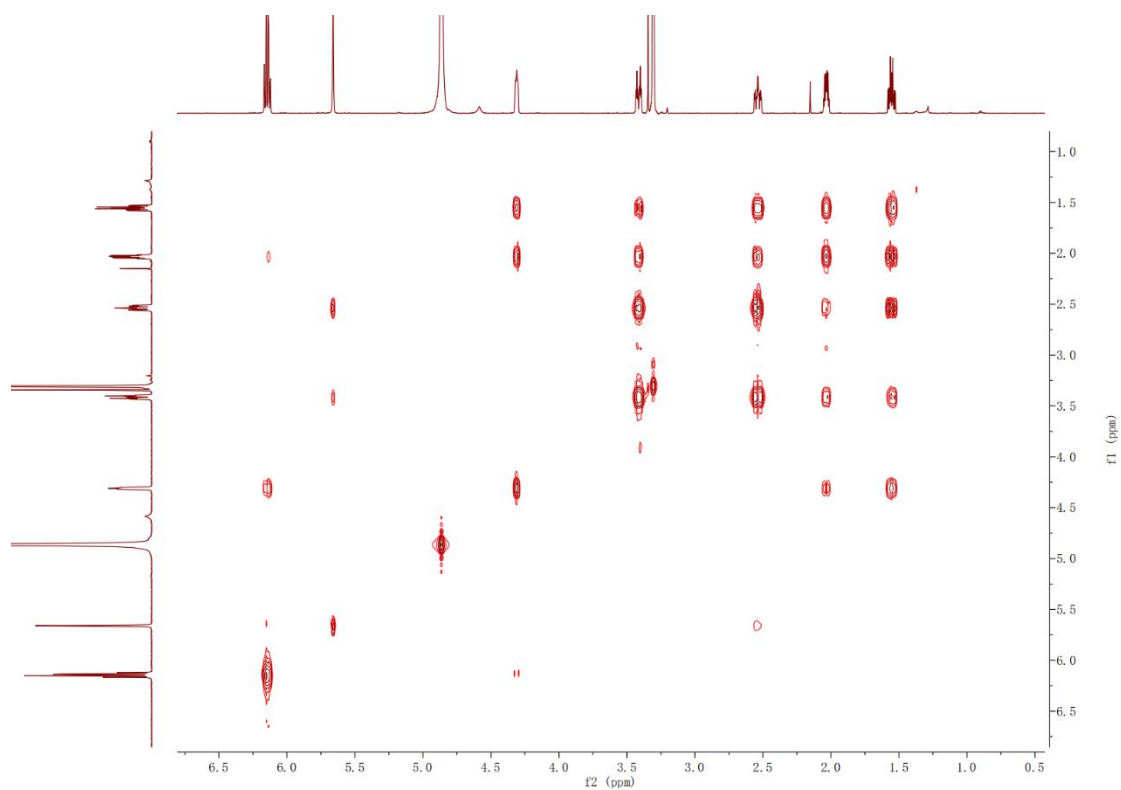

**Fig. S16** NOESY spectrum of compound **1**

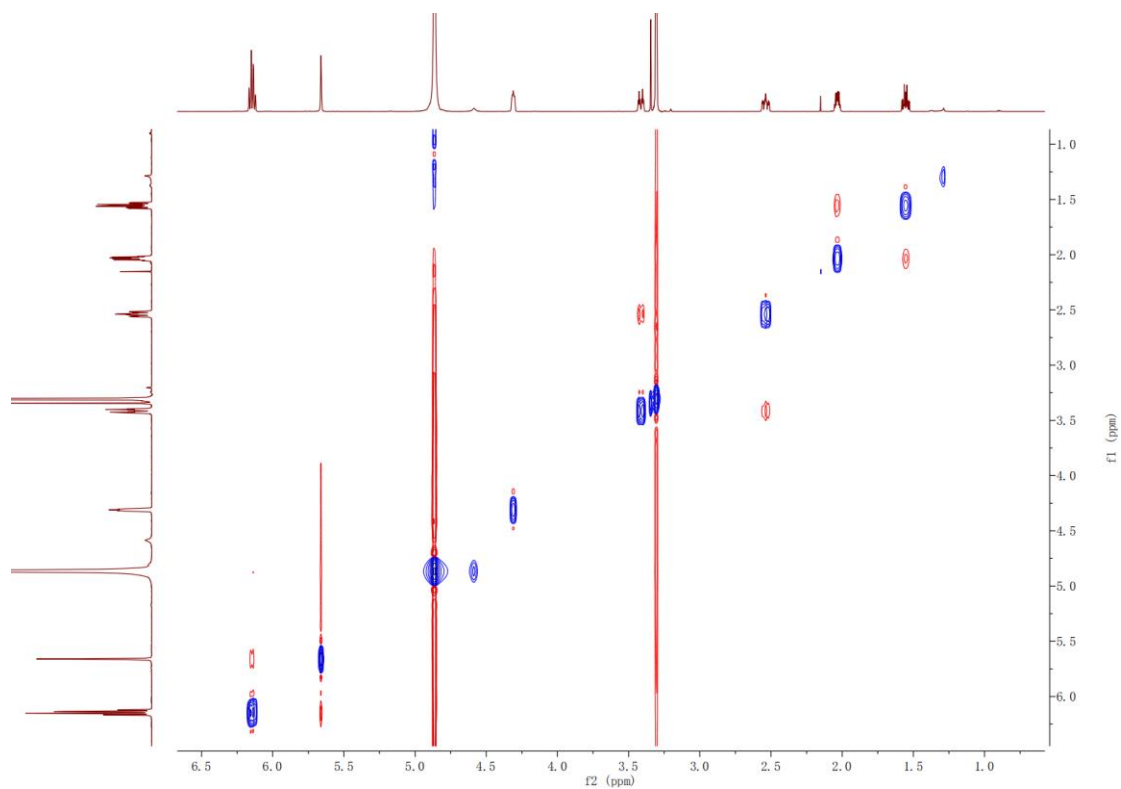



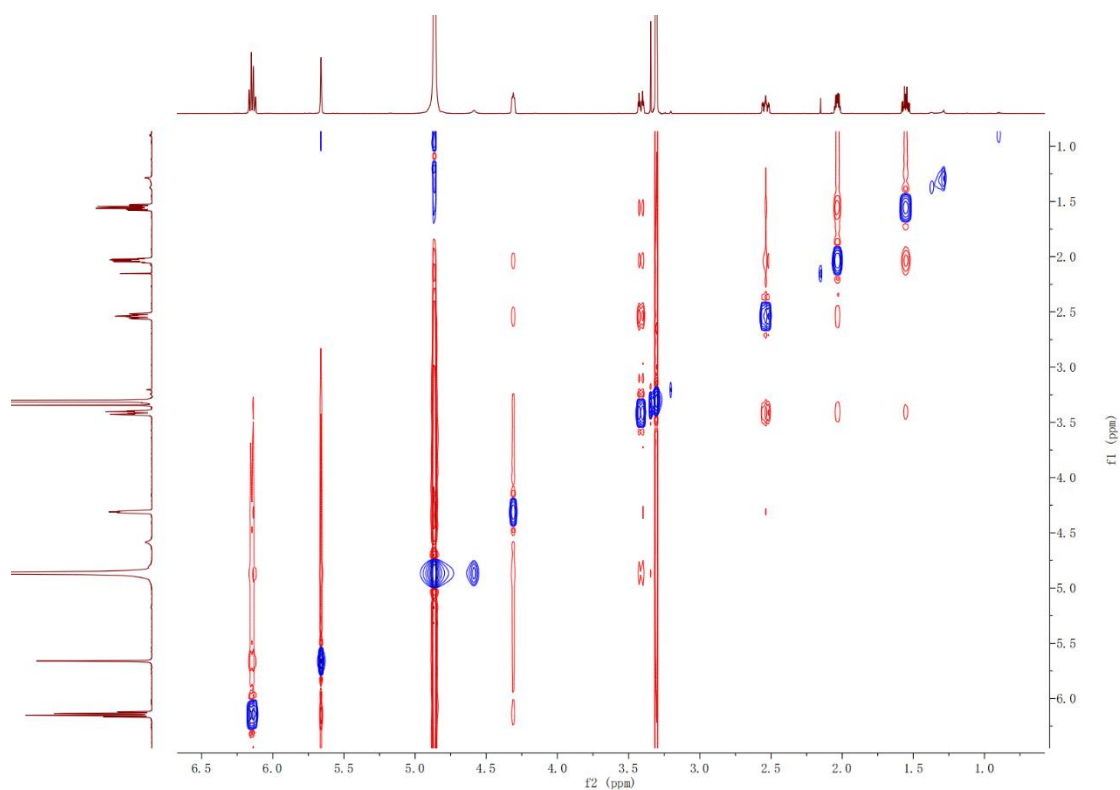

## Crystallographic data of compound **1**

**Crystal Data** for  $\text{C}_{16}\text{H}_{20}\text{O}_6$  ( $M = 308.32$  g/mol): triclinic, space group P1 (no. 1),  $a = 6.0982(3)$  Å,  $b = 7.5360(3)$  Å,  $c = 9.0518(3)$  Å,  $\alpha = 71.293(3)^\circ$ ,  $\beta = 70.575(4)^\circ$ ,  $\gamma = 80.927(4)^\circ$ ,  $V = 370.97(3)$  Å<sup>3</sup>,  $Z = 1$ ,  $T = 100.00(10)$  K,  $\mu(\text{Cu K}\alpha) = 0.883$  mm<sup>-1</sup>,  $D_{\text{calc}} = 1.380$  g/cm<sup>3</sup>, 6840 reflections measured ( $10.822^\circ \leq 2\theta \leq 149.022^\circ$ ), 2732 unique ( $R_{\text{int}} = 0.0350$ ,  $R_{\text{sigma}} = 0.0384$ ) which were used in all calculations. The final  $R_1$  was 0.0724 ( $I > 2\sigma(I)$ ) and  $wR_2$  was 0.1809 (all data).

**Fig. S17** UV spectrum of compound **1**

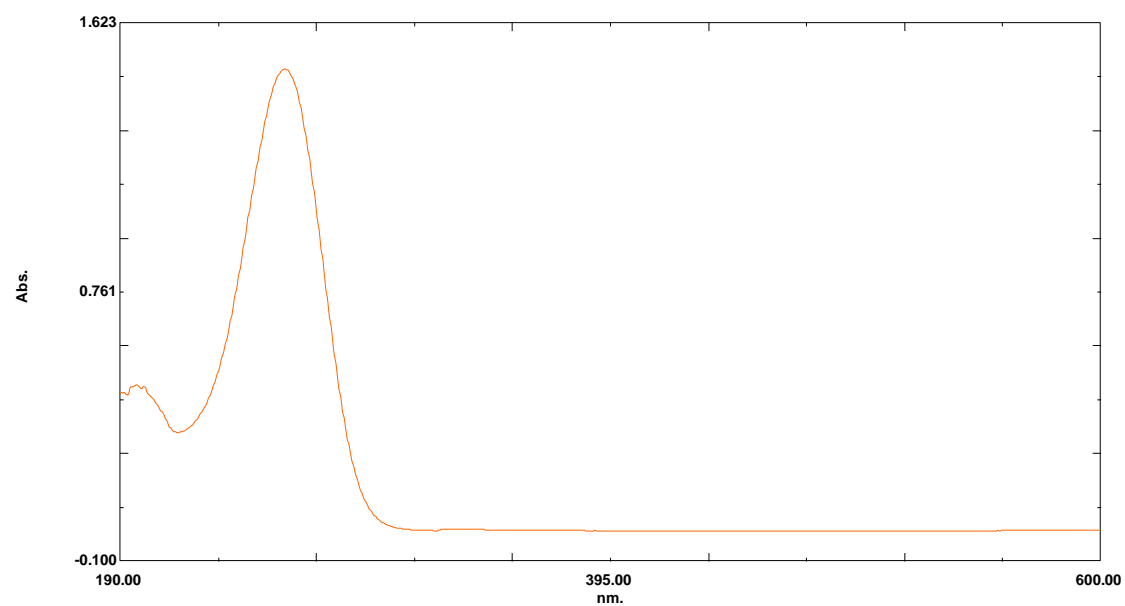

| No. | wavelength (nm) | Abs   |
|-----|-----------------|-------|
| 1   | 259.00          | 1.475 |
| 2   | 197.00          | 0.465 |

**Fig. S18** ECD spectrum of compound **1**

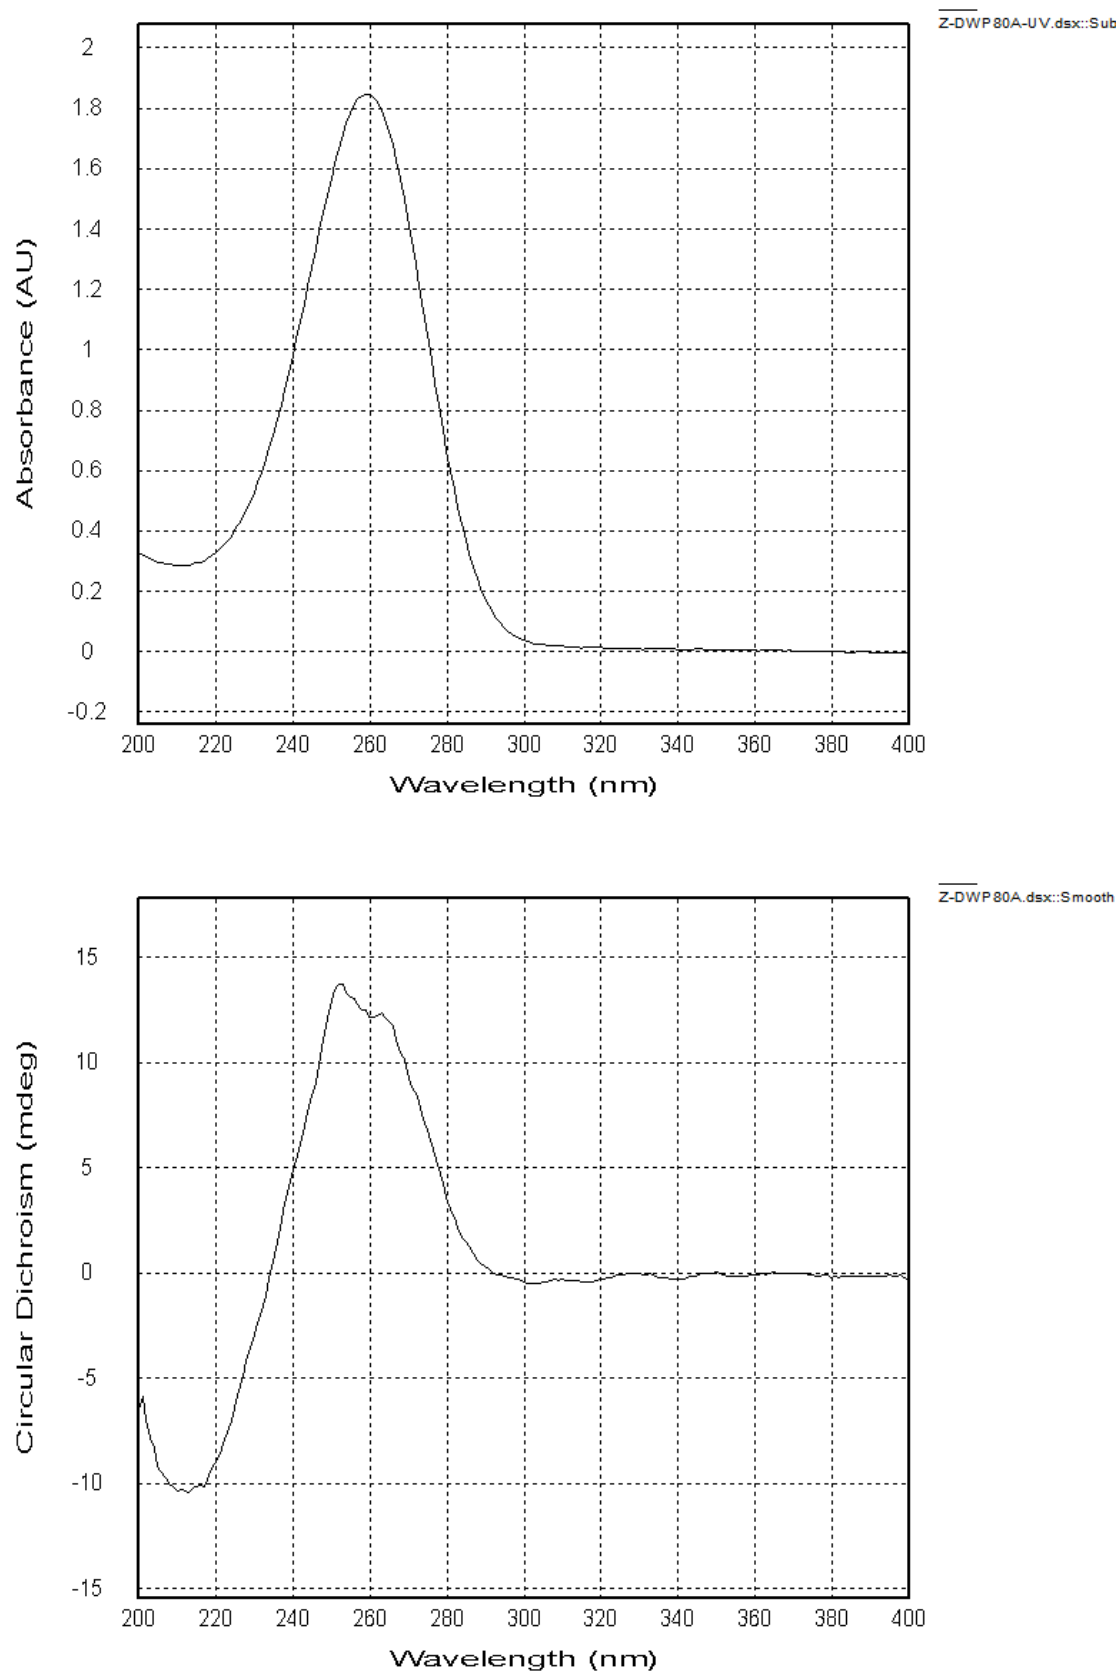

**Fig. S19** IR spectrum of compound **1**

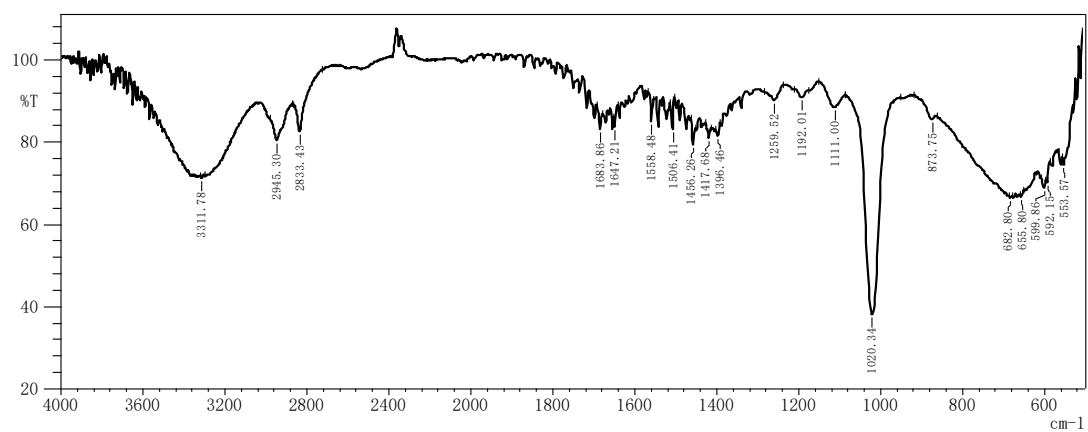

Fig. S20 HRESIMS spectrum of compound 2

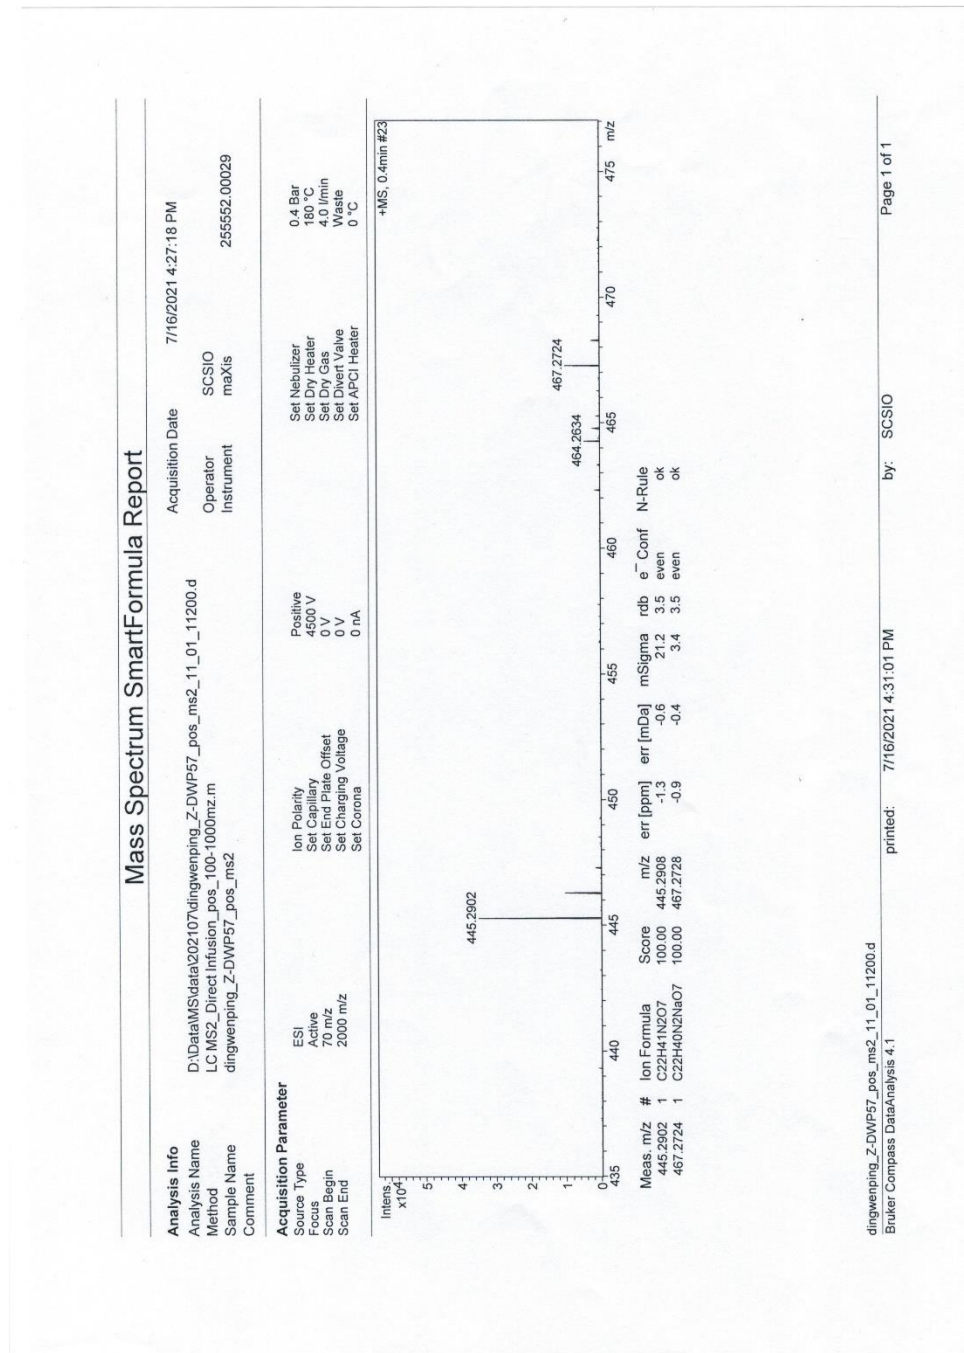

**Fig. S21** HRESI-MS/MS-positive spectrum of compound **2**

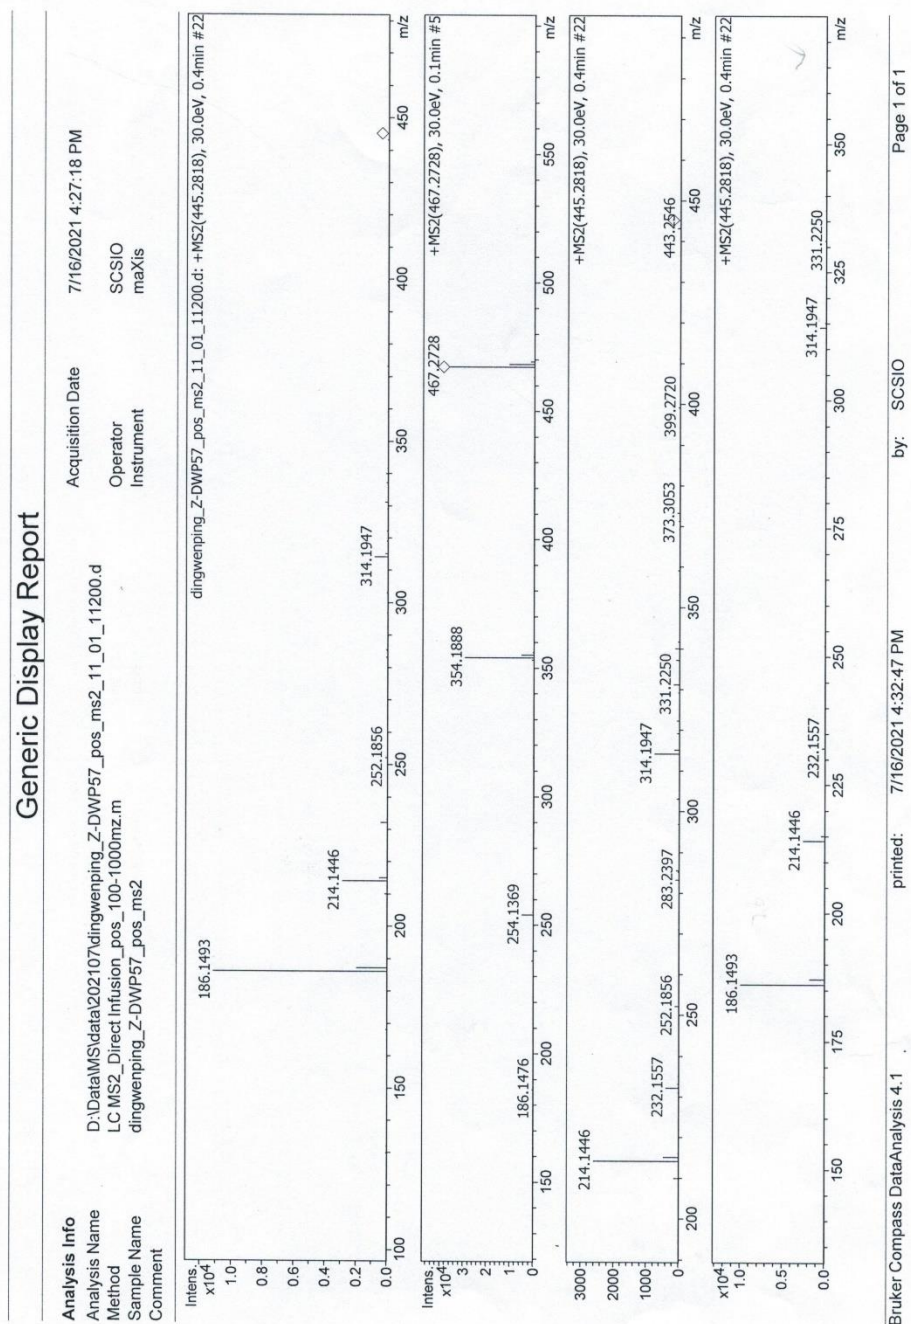

**Fig. S22**  $^1\text{H}$  NMR spectrum ( $\text{CD}_3\text{OD}$ , 700 MHz) of compound **2**

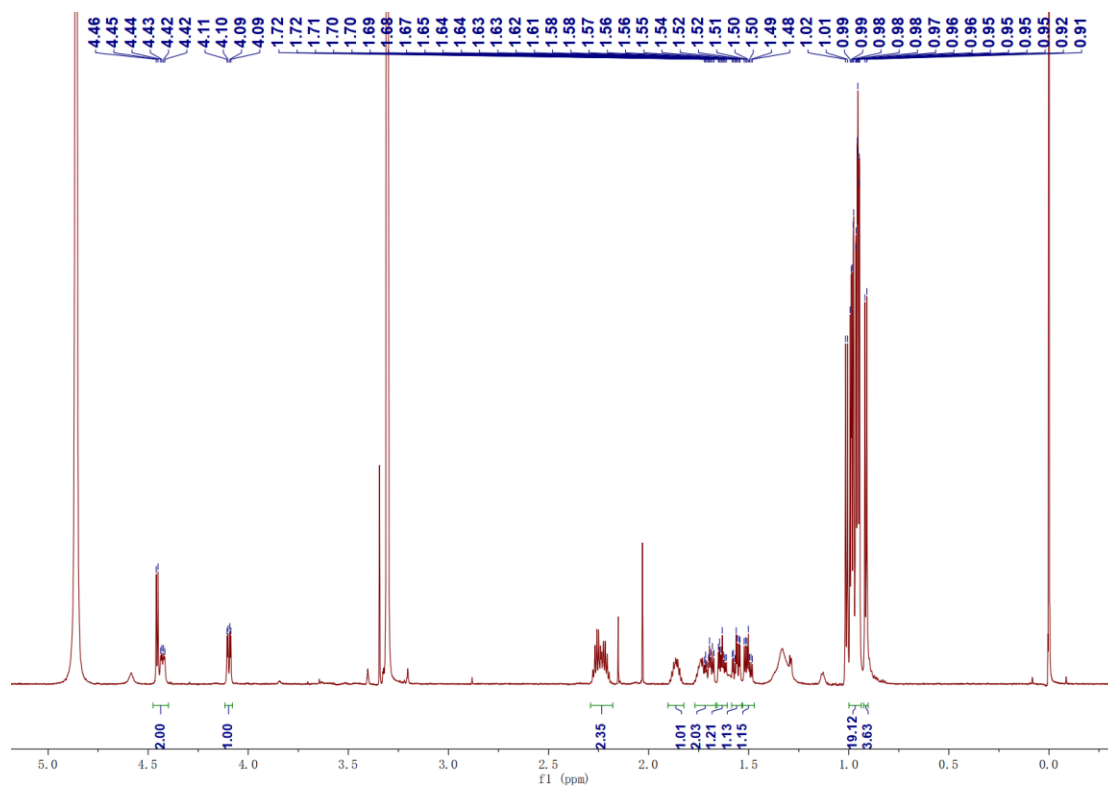

**Fig. S23**  $^{13}\text{C}$  NMR spectrum ( $\text{CD}_3\text{OD}$ , 176 MHz) of compound **2**

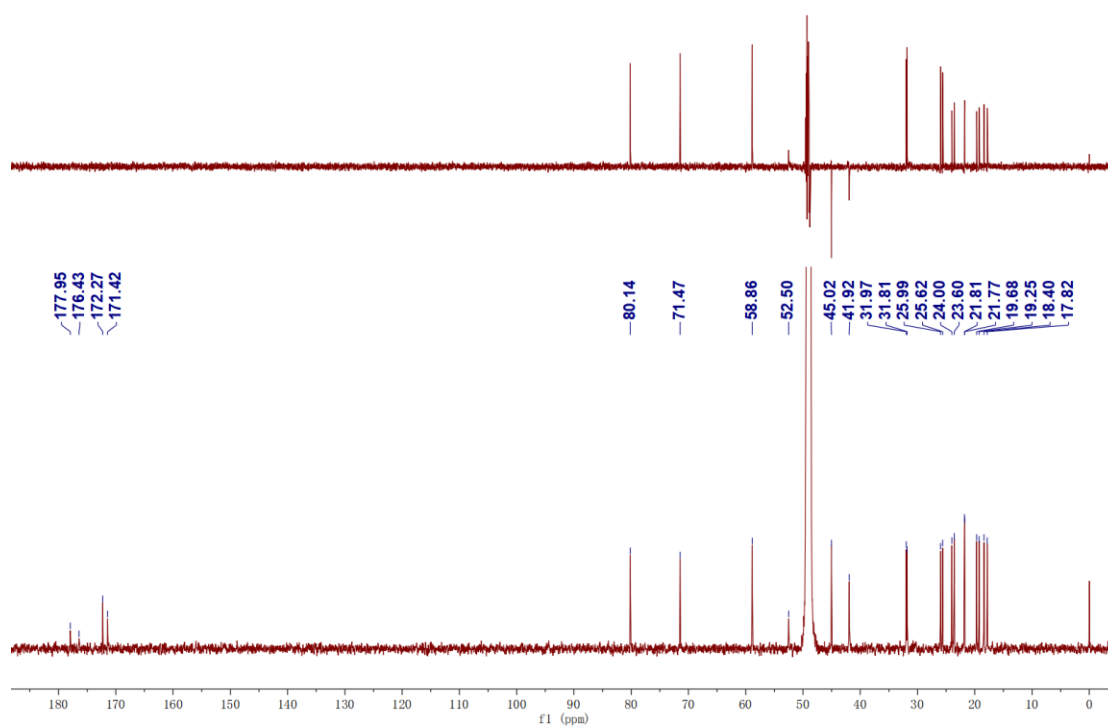

**Fig. S24** HSQC spectrum of compound **2**

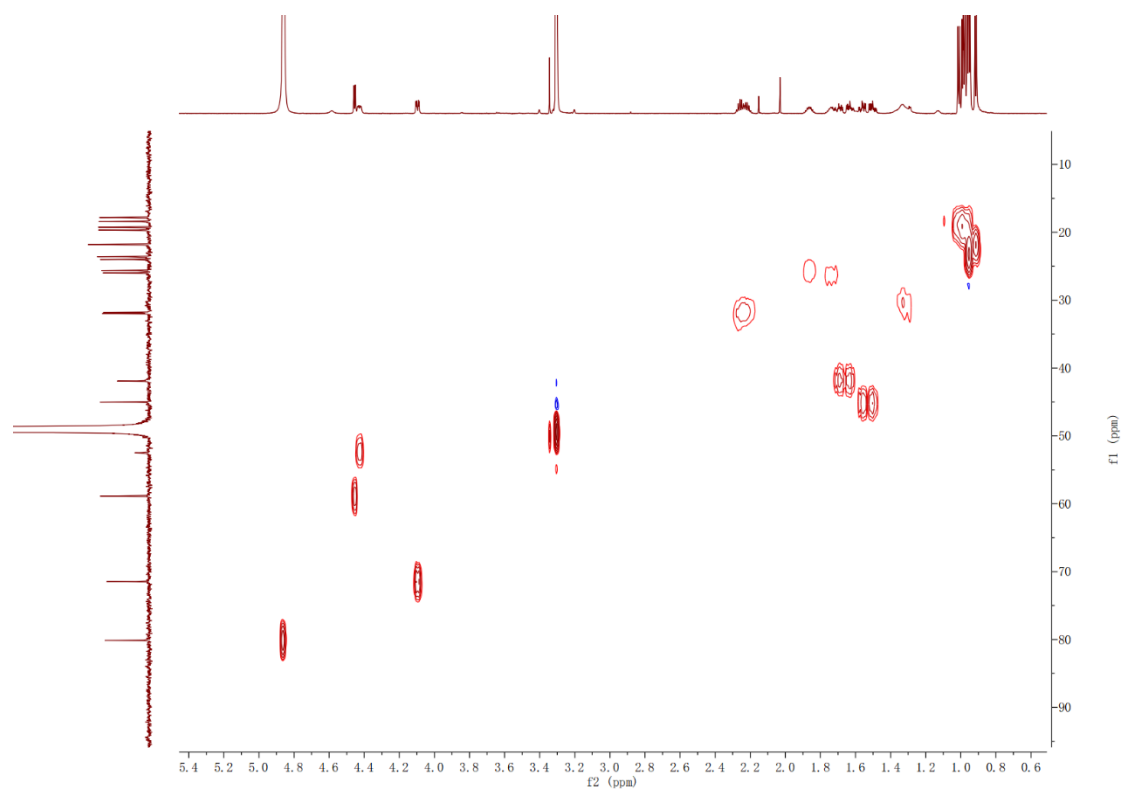

**Fig. S25** HMBC spectrum of compound **2**

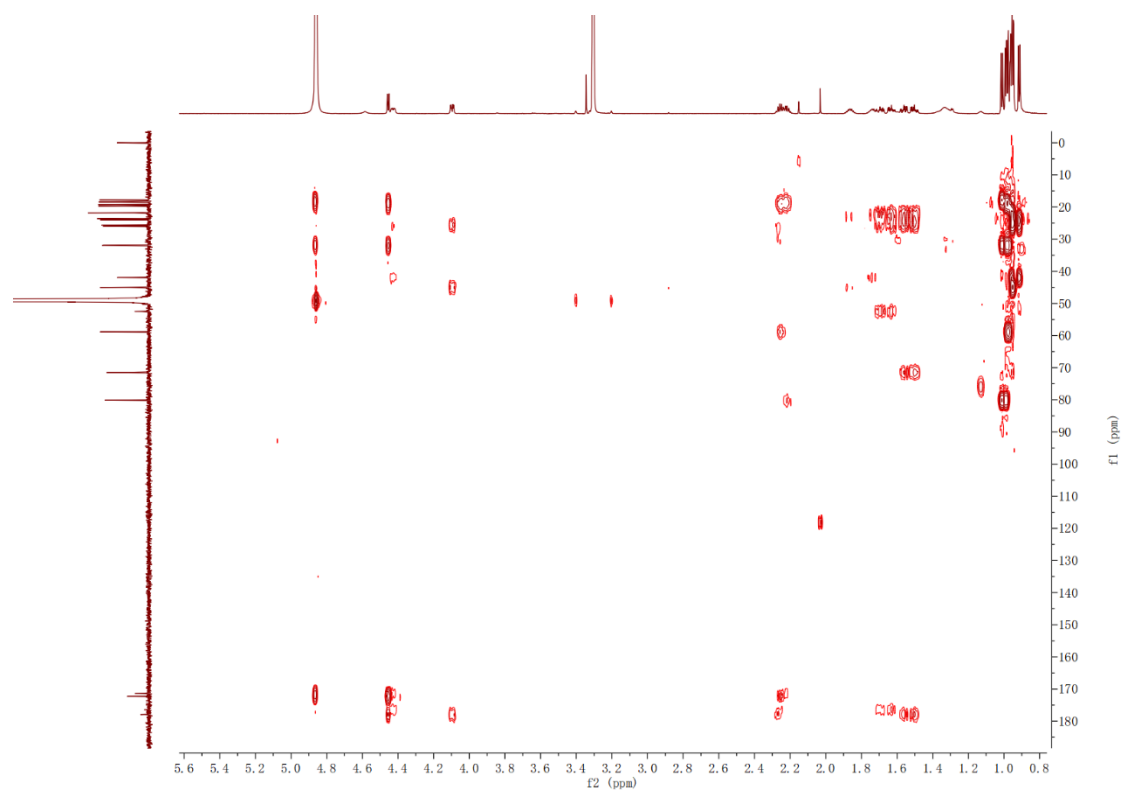



**Fig. S26**  $^1\text{H}$ - $^1\text{H}$  COSY spectrum of compound **2**

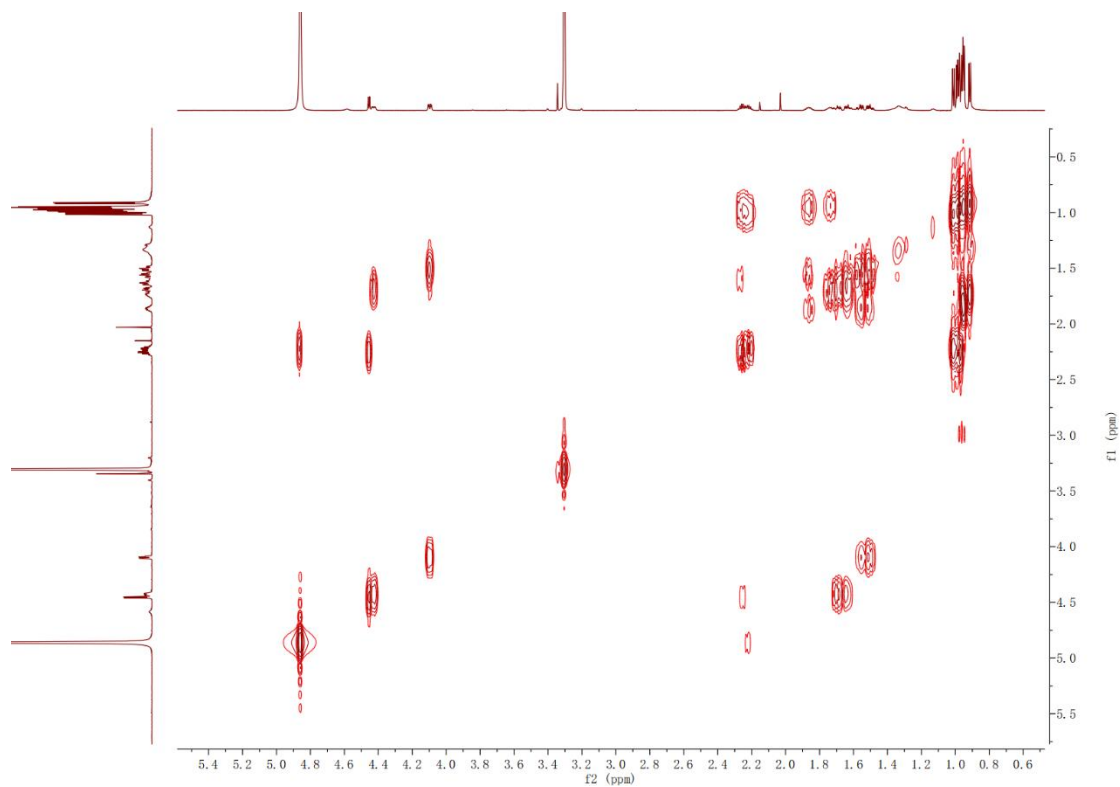

**Fig. S27** NOESY spectrum of compound **2**

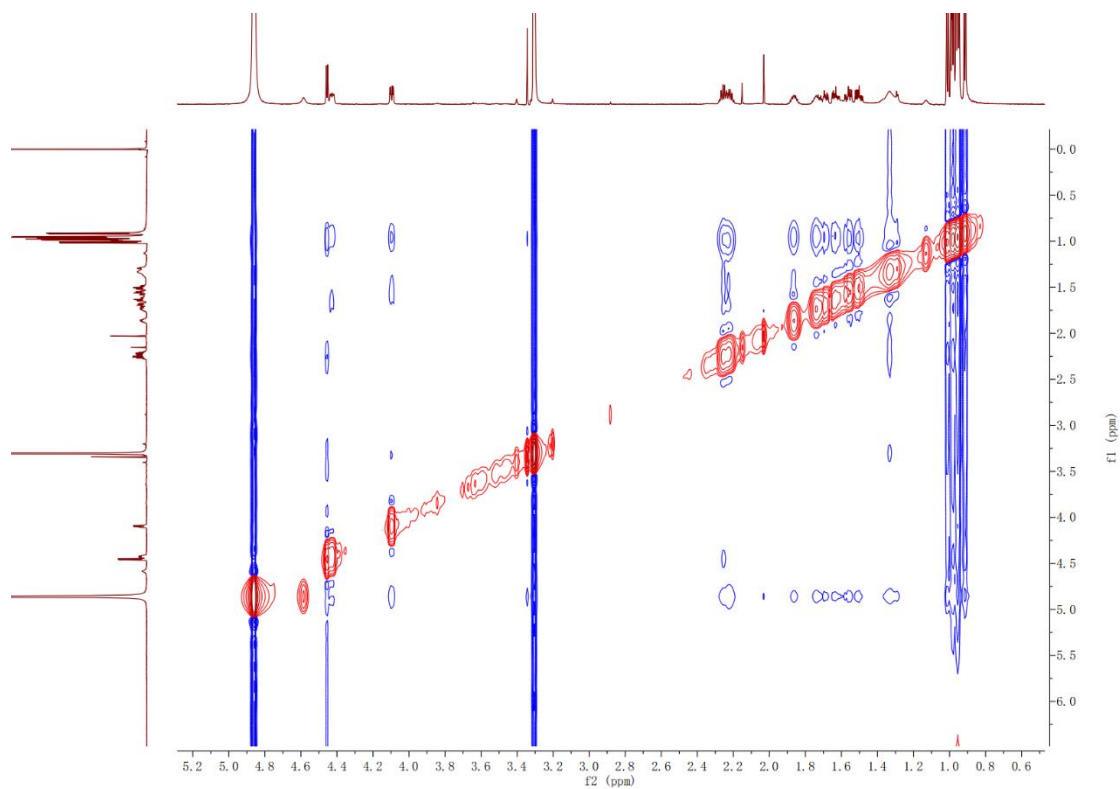

**Fig. S28** UV spectrum of compound **2**

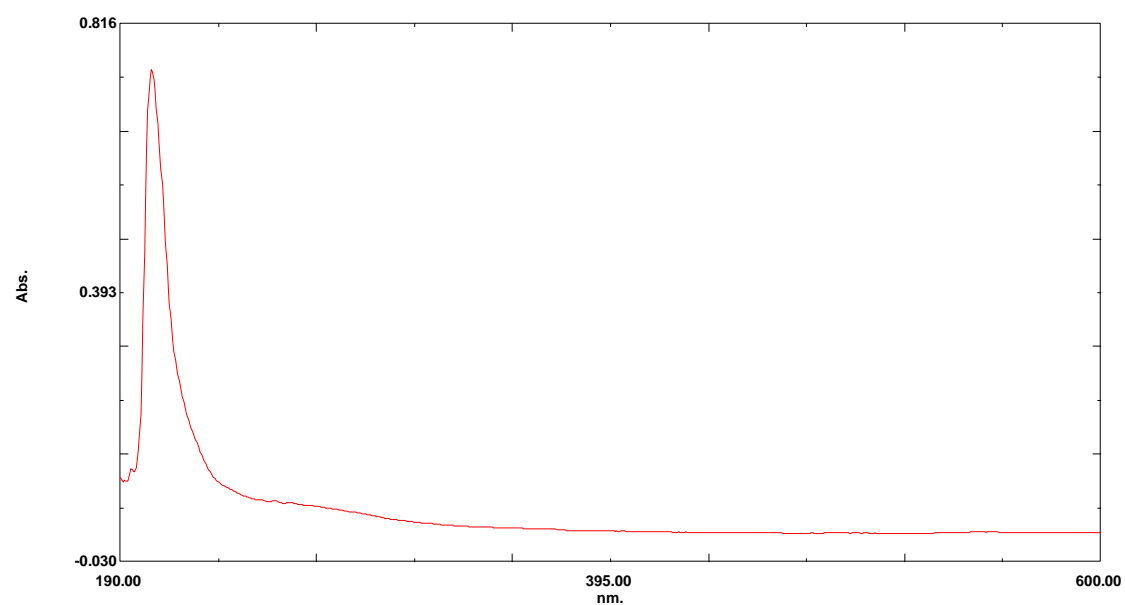

| No. | wavelength (nm) | Abs   |
|-----|-----------------|-------|
| 1   | 203.00          | 0.743 |

**Fig. S29** ECD spectrum of compound **2**

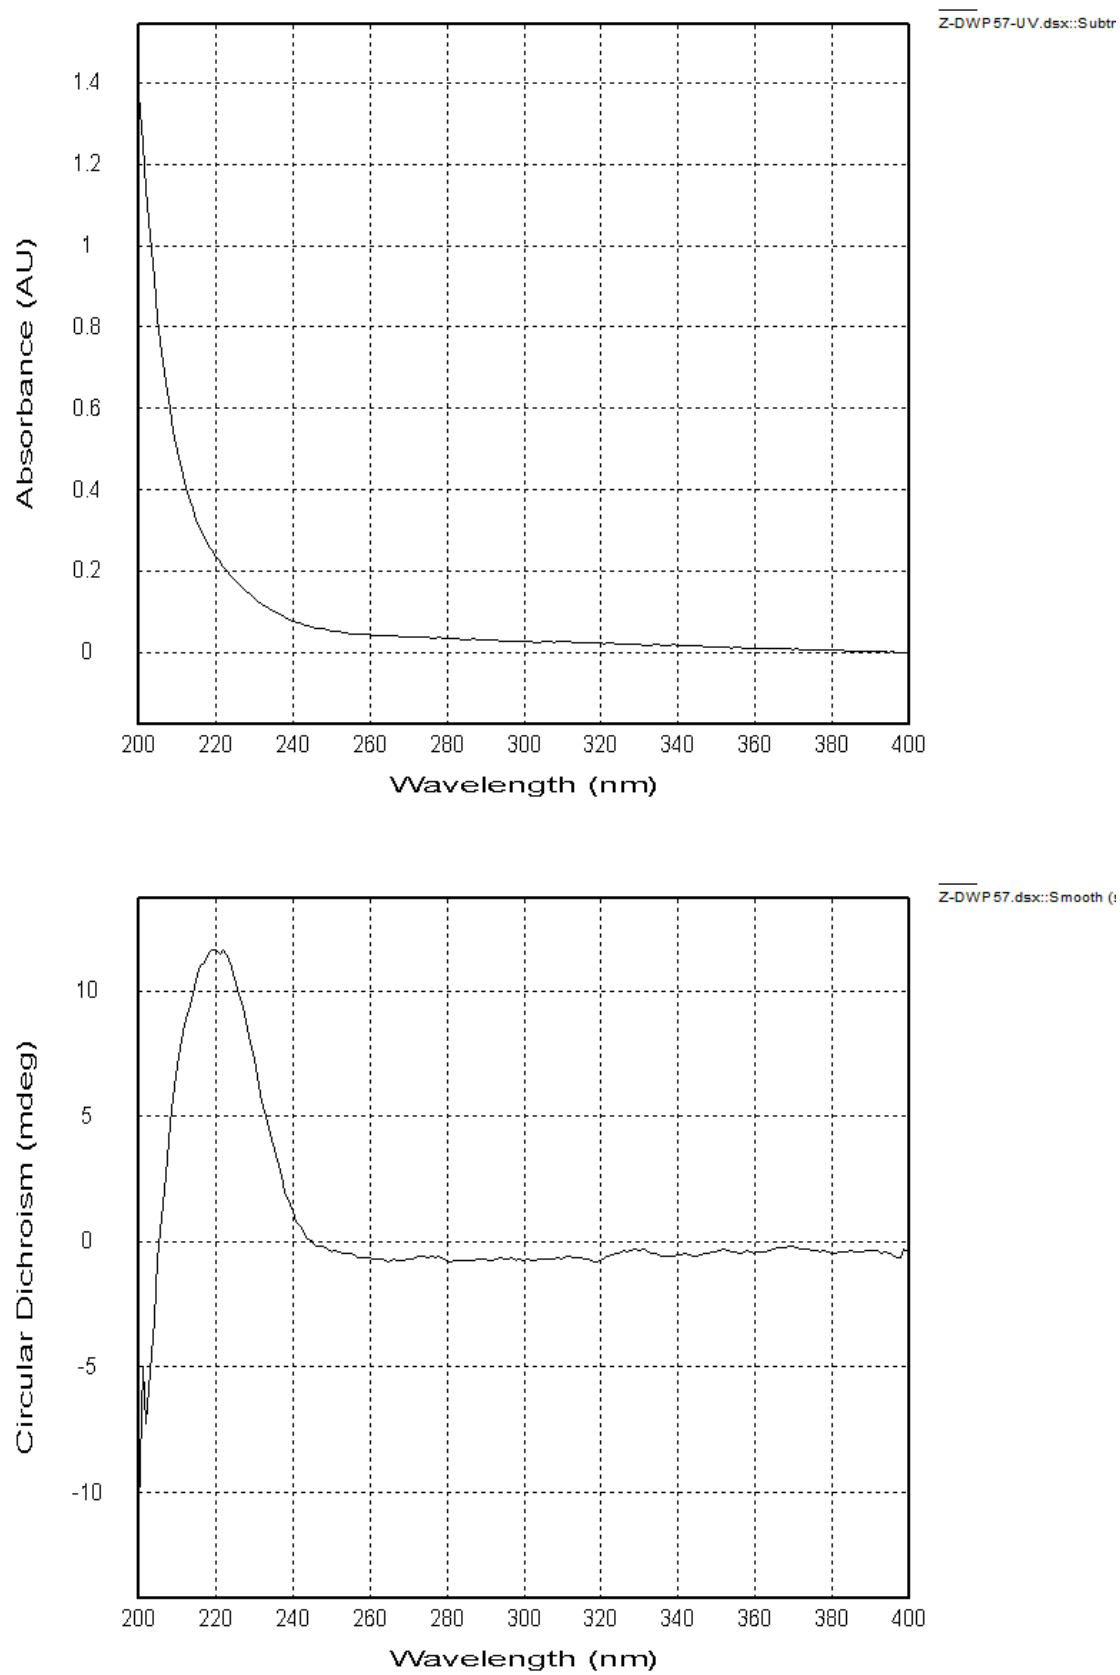

**Fig. S30** IR spectrum of compound **2**

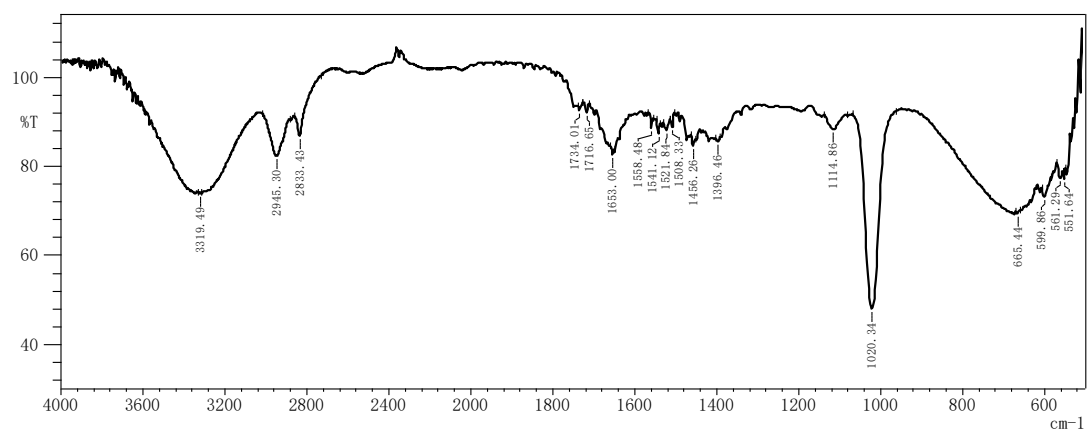

Fig. S31 HRESIMS spectrum of compound 3

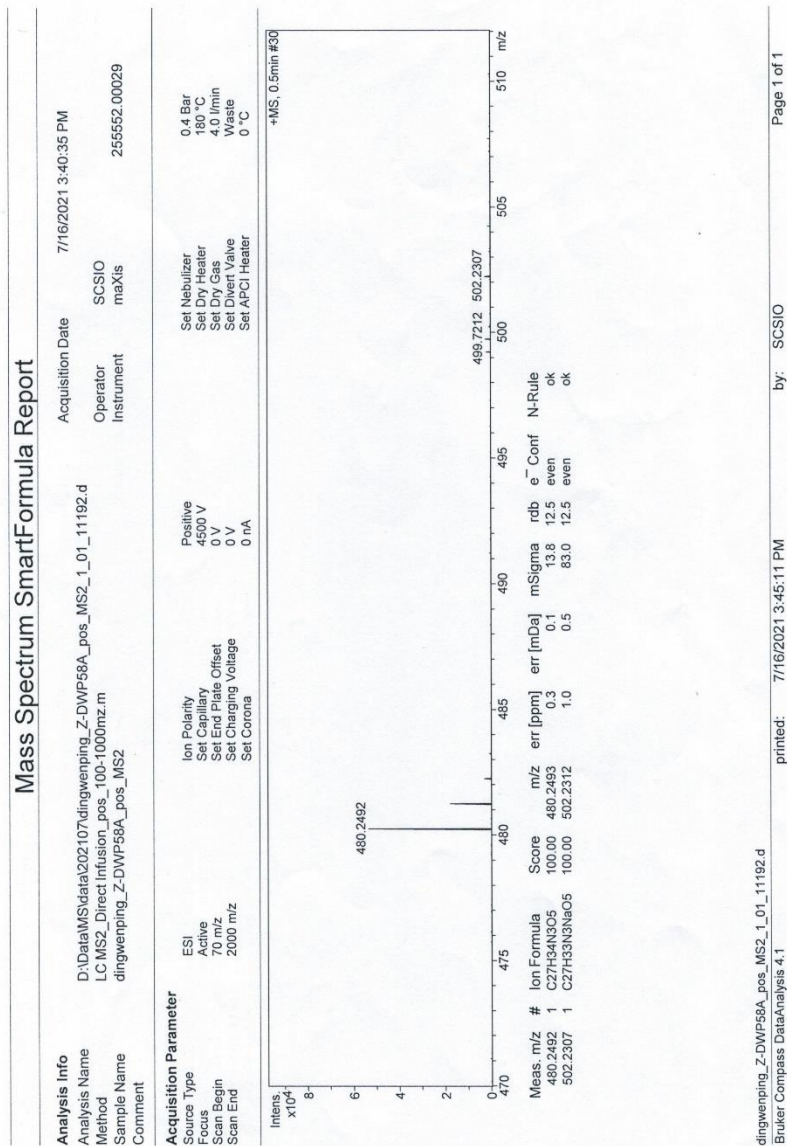

**Fig. S32** HRESI-MS/MS-positive spectrum of compound **3**

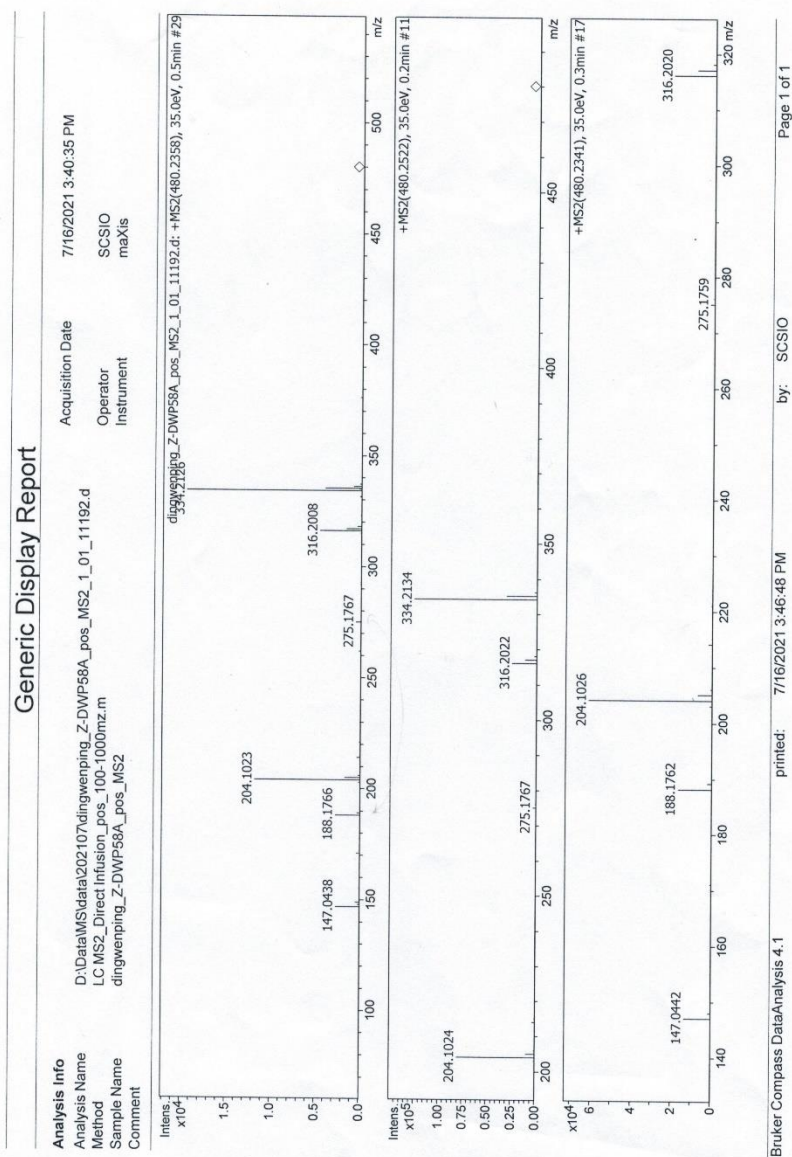

**Fig. S33**  $^1\text{H}$  NMR spectrum ( $\text{CD}_3\text{OD}$ , 700 MHz) of compound **3** (1)

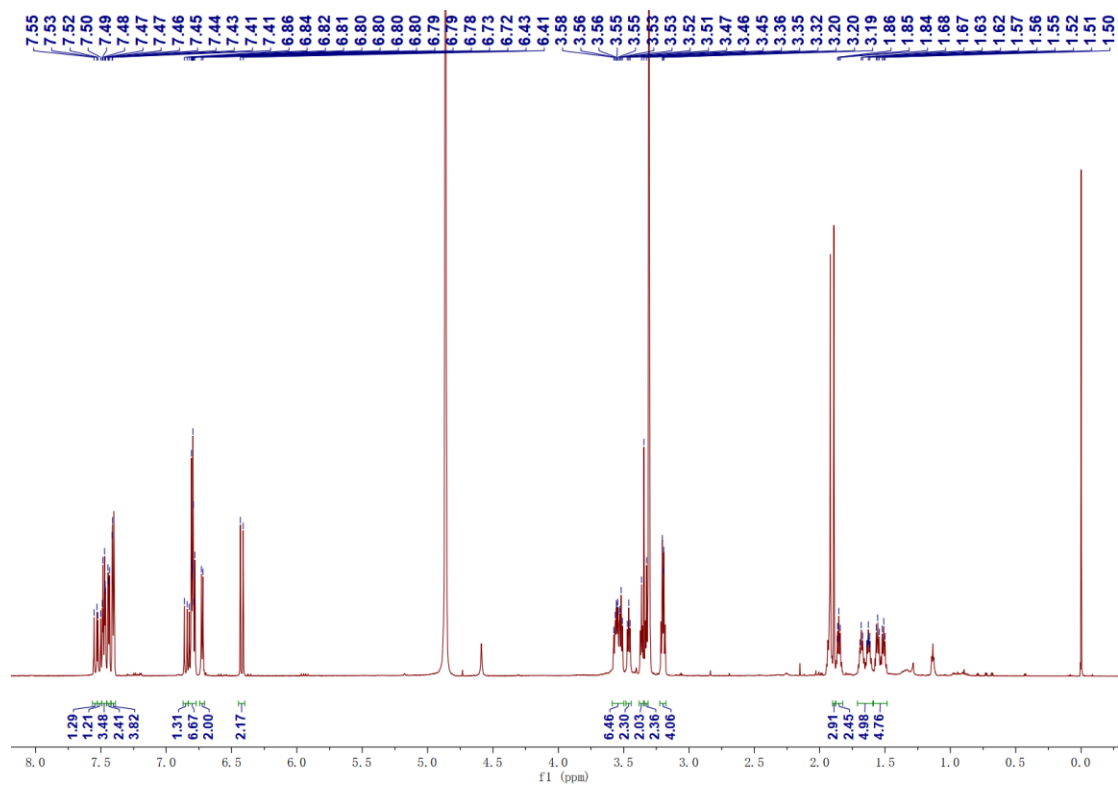

**Fig. S34**  $^{13}\text{C}$  NMR spectrum ( $\text{CD}_3\text{OD}$ , 176 MHz) of compound **3** (1)

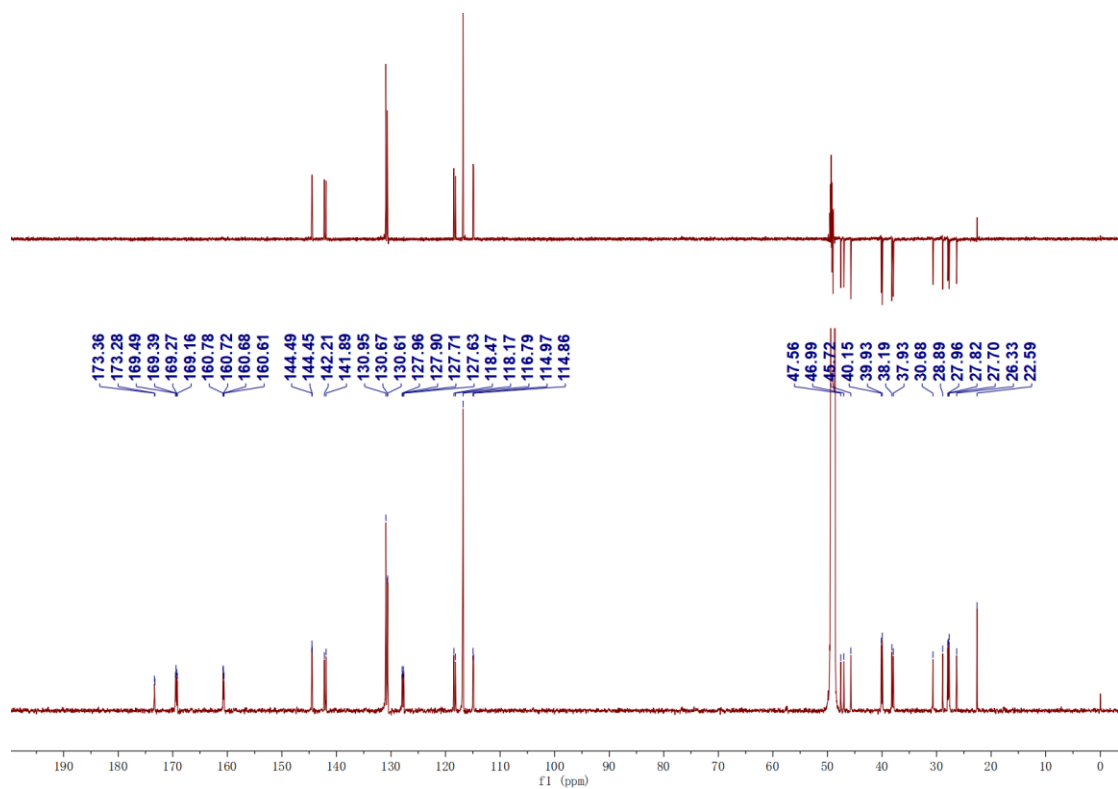

**Fig. S35**  $^1\text{H}$  NMR spectrum ( $\text{CD}_3\text{OD}$ , 700 MHz) of compound **3**

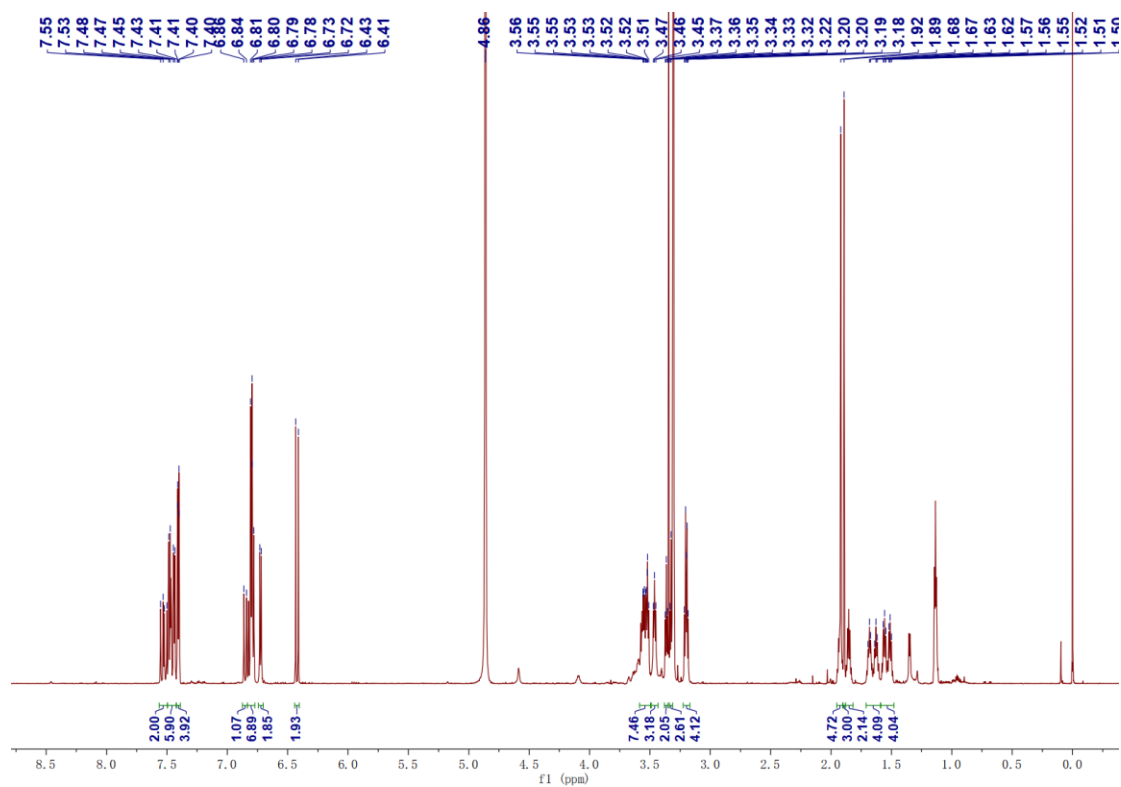

**Fig. S36**  $^{13}\text{C}$  NMR spectrum ( $\text{CD}_3\text{OD}$ , 176 MHz) of compound **3**

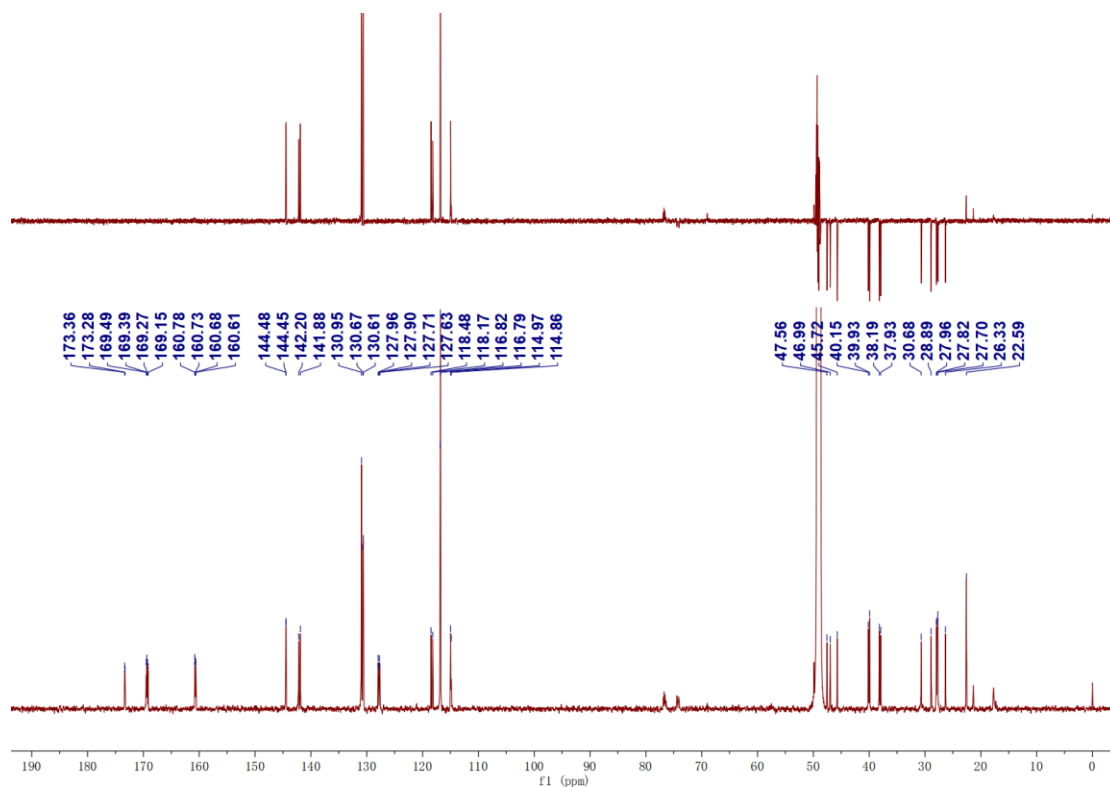



**Fig. S37** HSQC spectrum of compound **3**

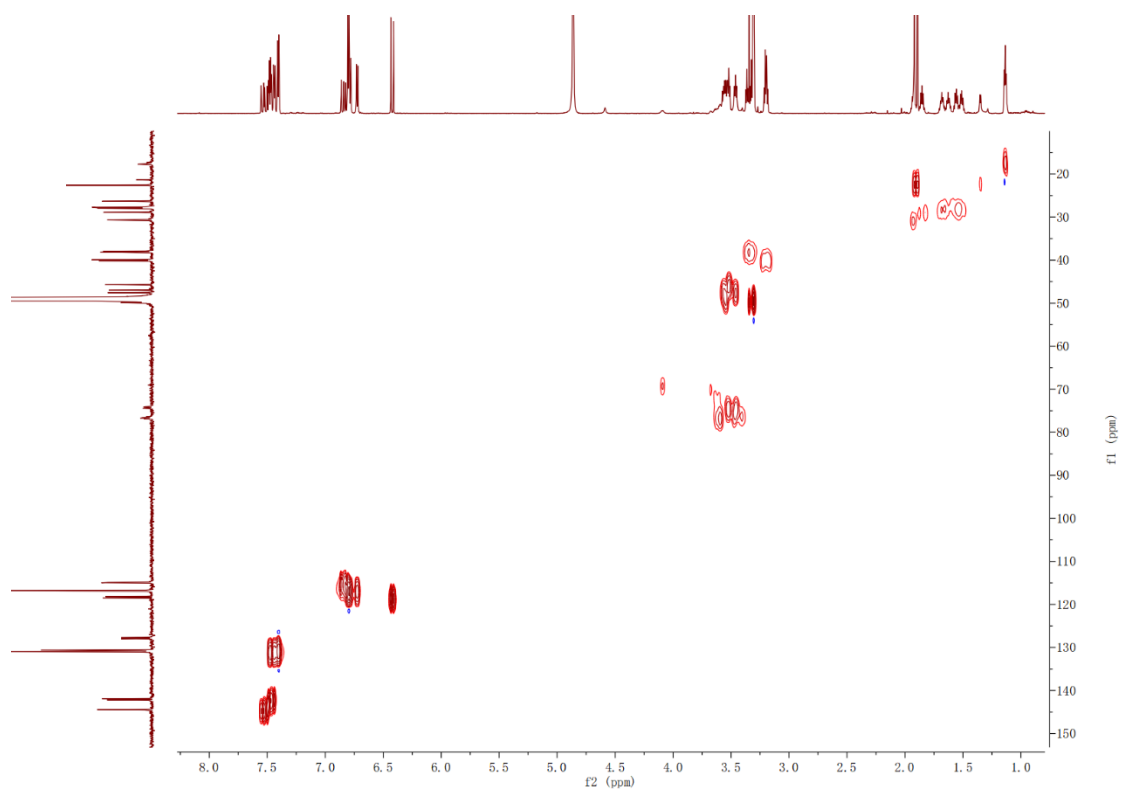

**Fig. S38** HMBC spectrum of compound **3**

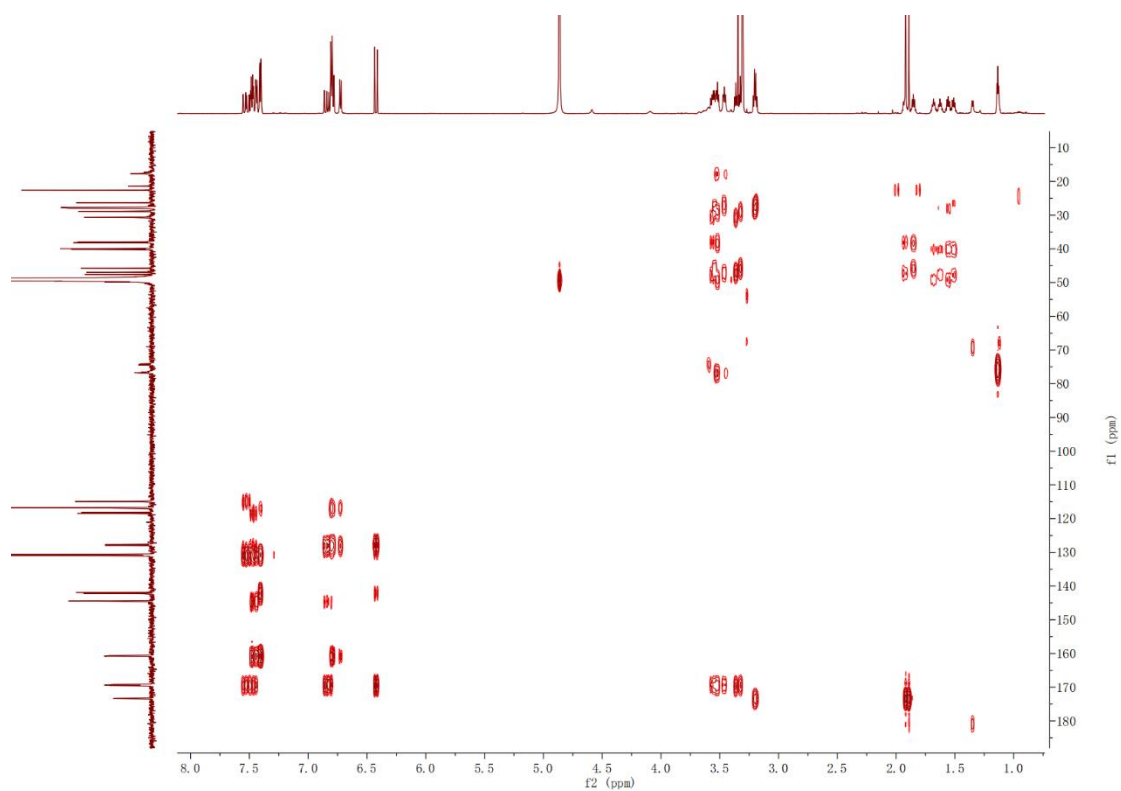

**Fig. S39**  $^1\text{H}$ – $^1\text{H}$  COSY spectrum of compound **3**

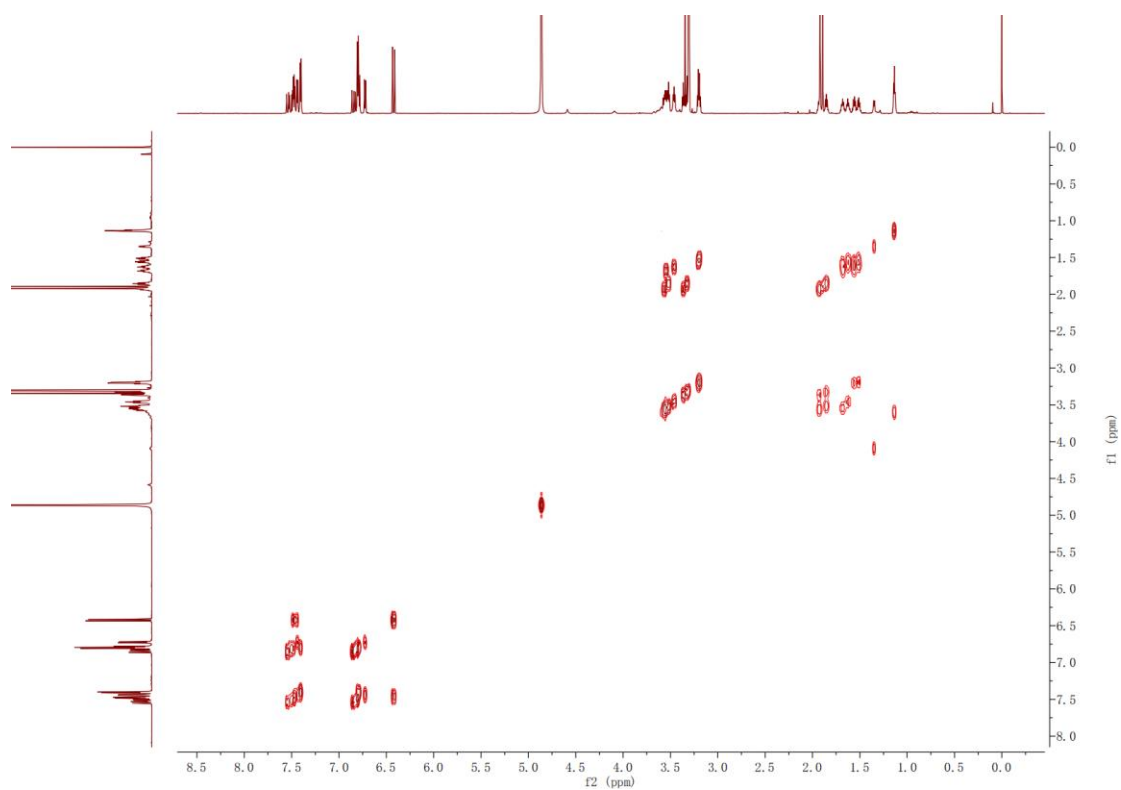

**Fig. S40** NOESY spectrum of compound **3**

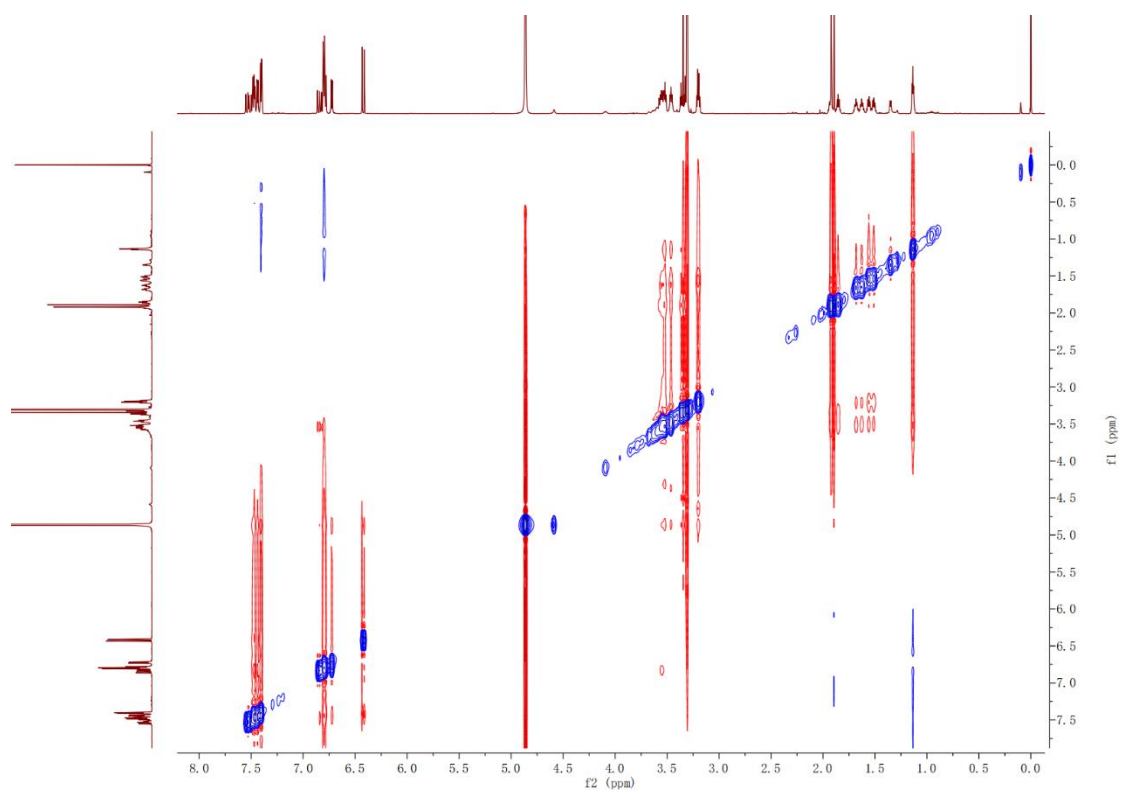

**Fig. S41** UV spectrum of compound **3**

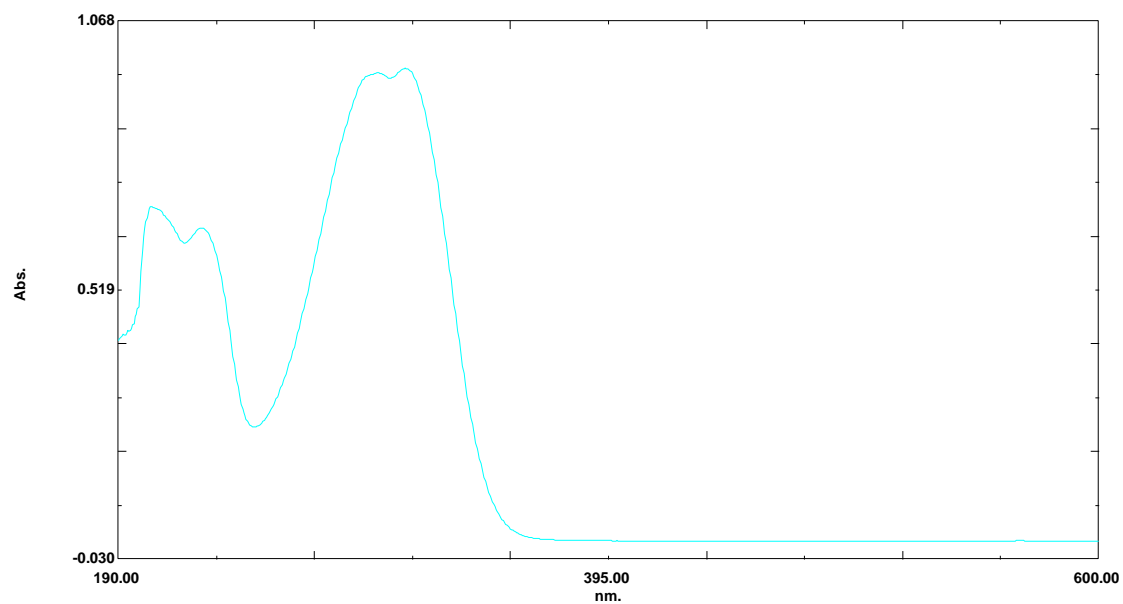

| No. | wavelength (nm) | Abs   |
|-----|-----------------|-------|
| 1   | 310.00          | 0.972 |
| 2   | 298.50          | 0.962 |
| 3   | 224.50          | 0.646 |
| 4   | 204.00          | 0.690 |

**Fig. S42** IR spectrum of compound **3**

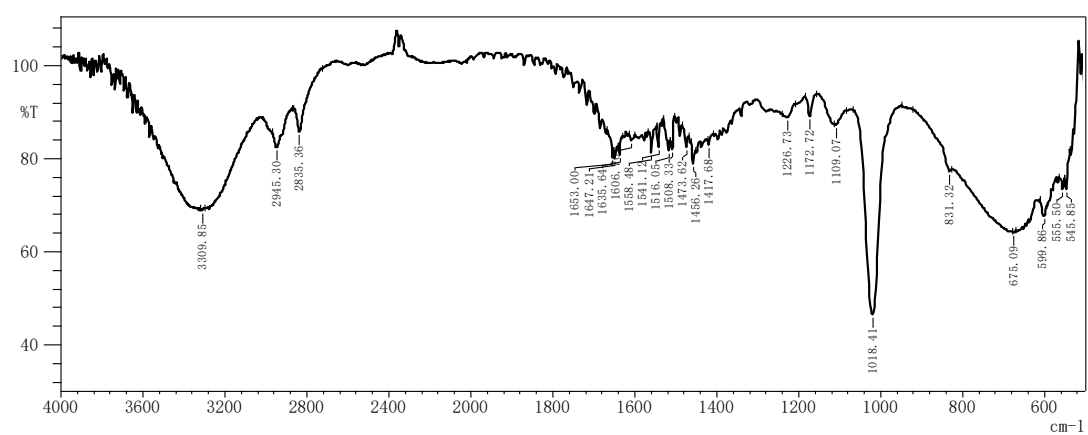

Fig. S43 HRESIMS spectrum of compound 4

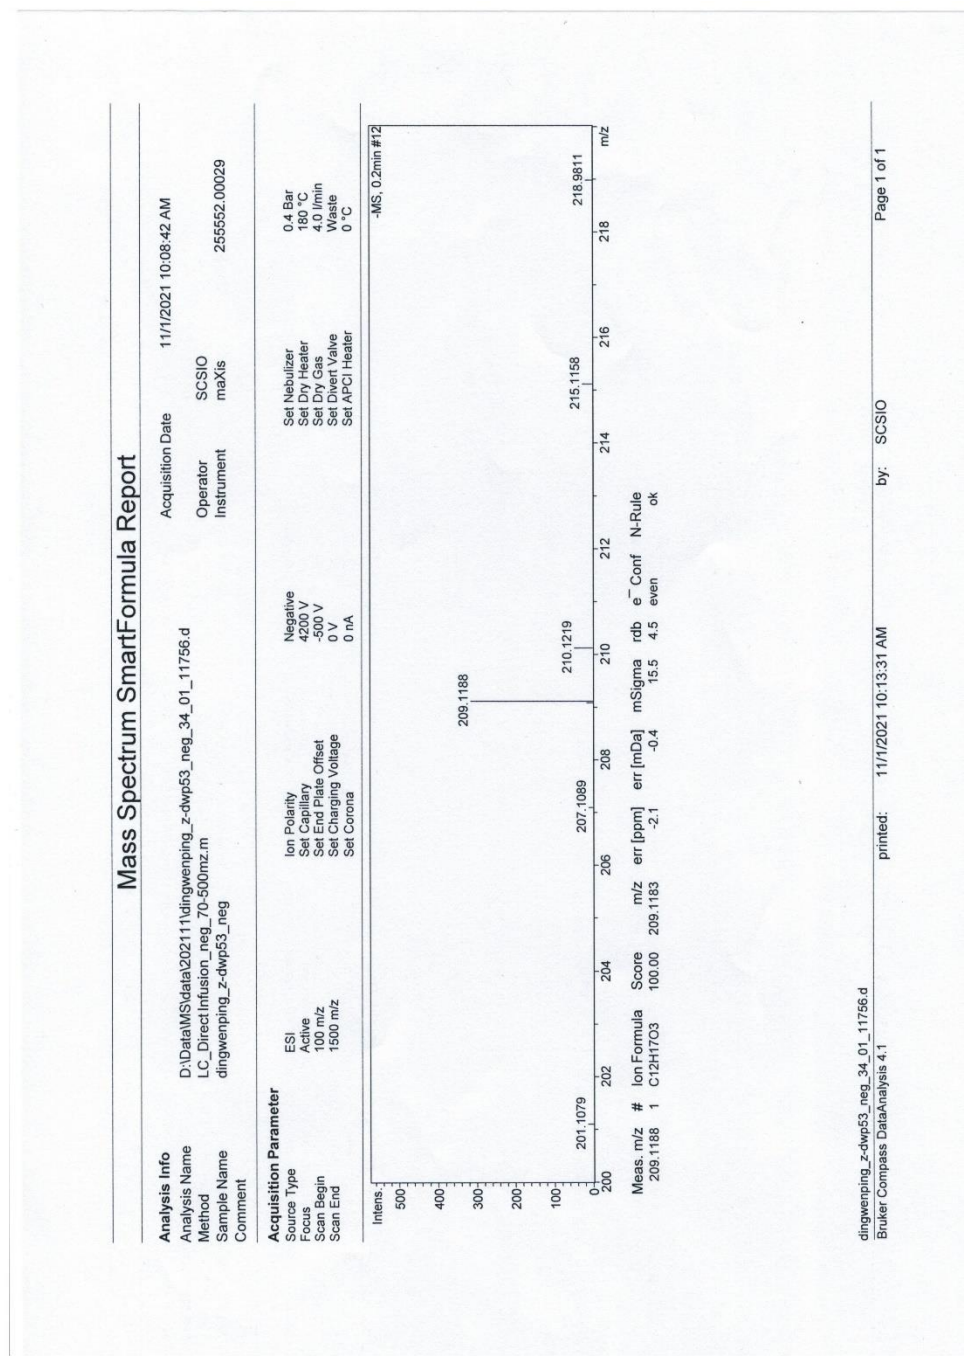

**Fig. S44**  $^1\text{H}$  NMR spectrum ( $\text{CD}_3\text{Cl}$ , 700 MHz) of compound **4**

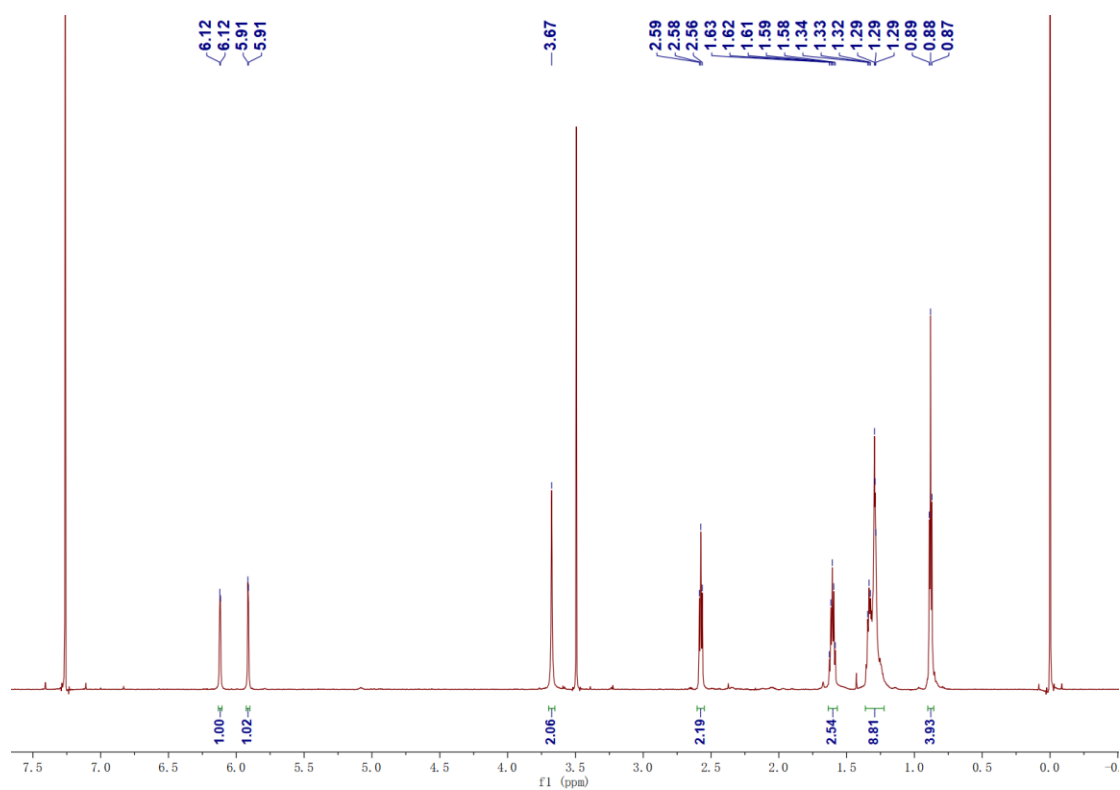

**Fig. S45**  $^{13}\text{C}$  NMR spectrum ( $\text{CD}_3\text{Cl}$ , 176 MHz) of compound **4**

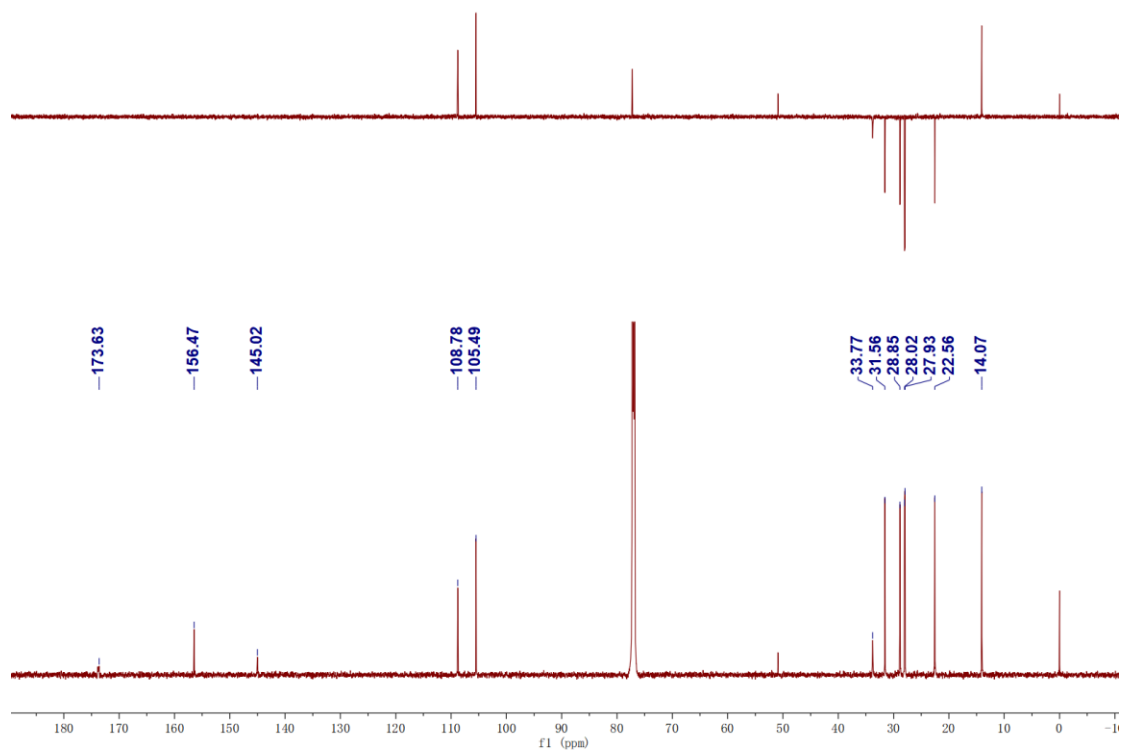

**Fig. S46** HSQC spectrum of compound **4**

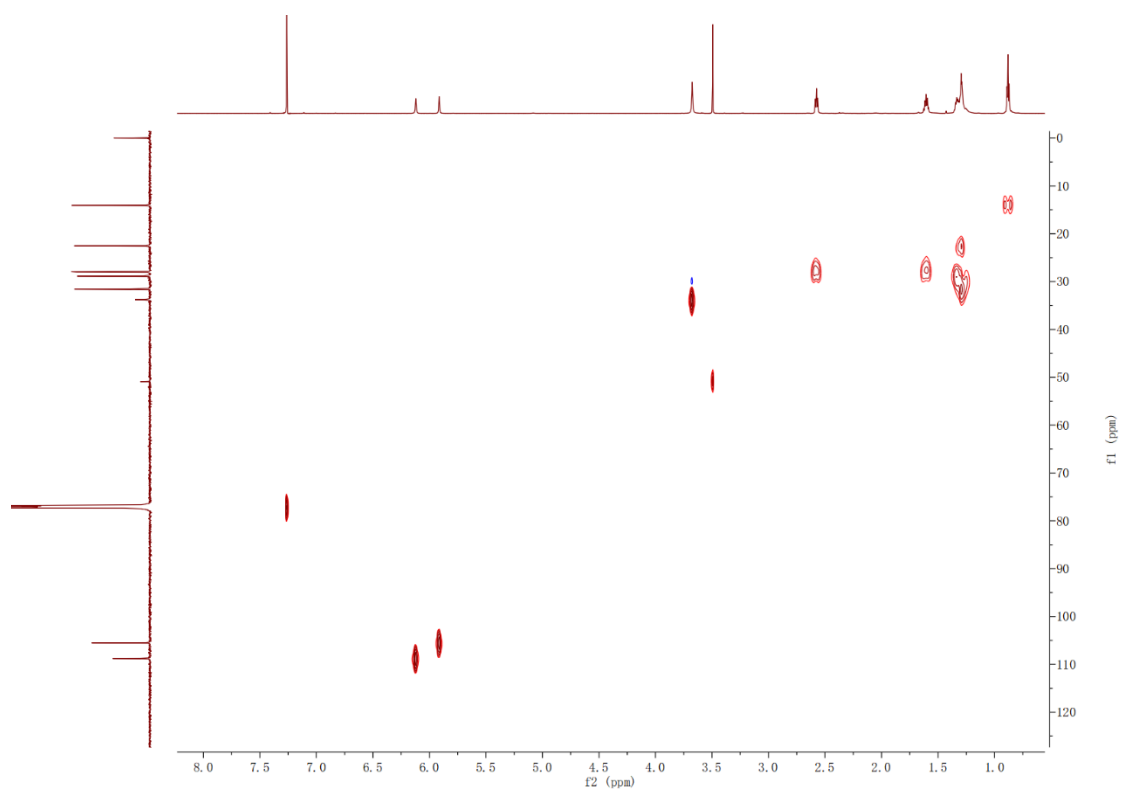

**Fig. S47** HMBC spectrum of compound **4**

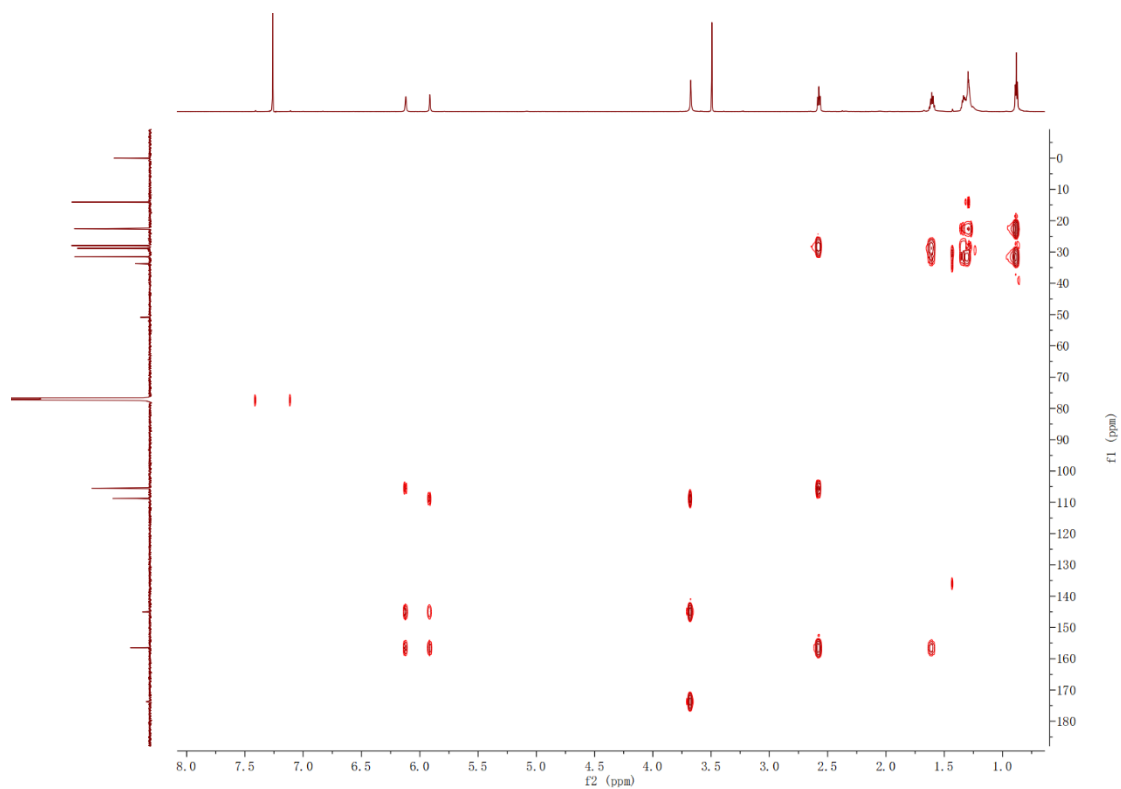

**Fig. S48**  $^1\text{H}$ - $^1\text{H}$  COSY spectrum of compound **4**

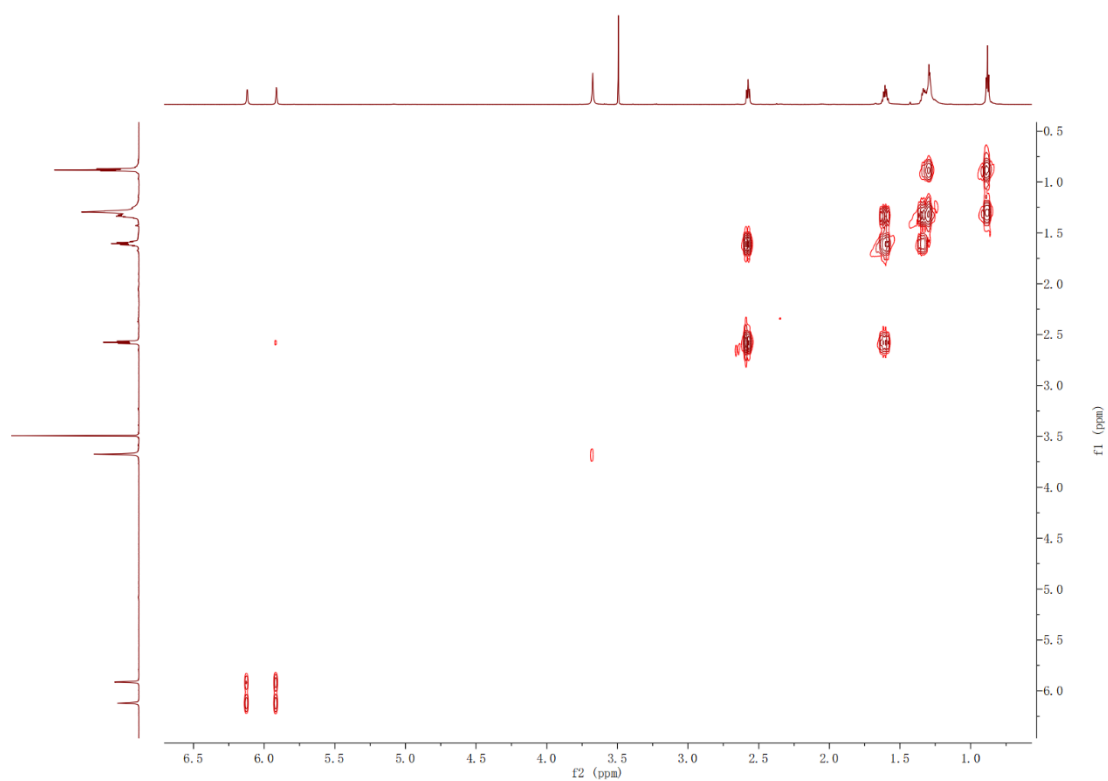

**Fig. S49** UV spectrum of compound **4**

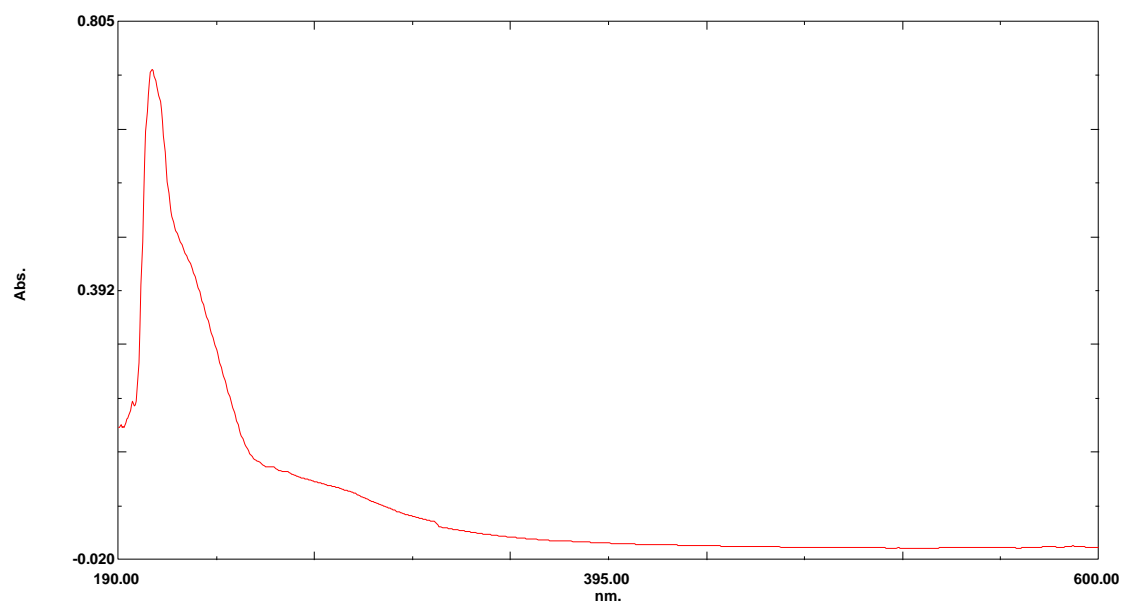

| No. | wavelength (nm) | Abs   |
|-----|-----------------|-------|
| 1   | 204.00          | 0.731 |

**Fig. S50** IR spectrum of compound **4**

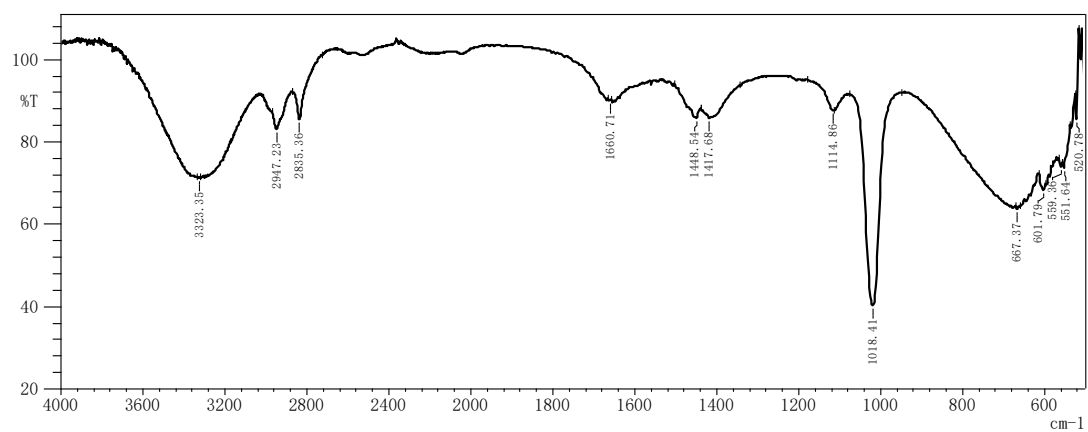



Fig. S51 HRESIMS spectrum of compound 5

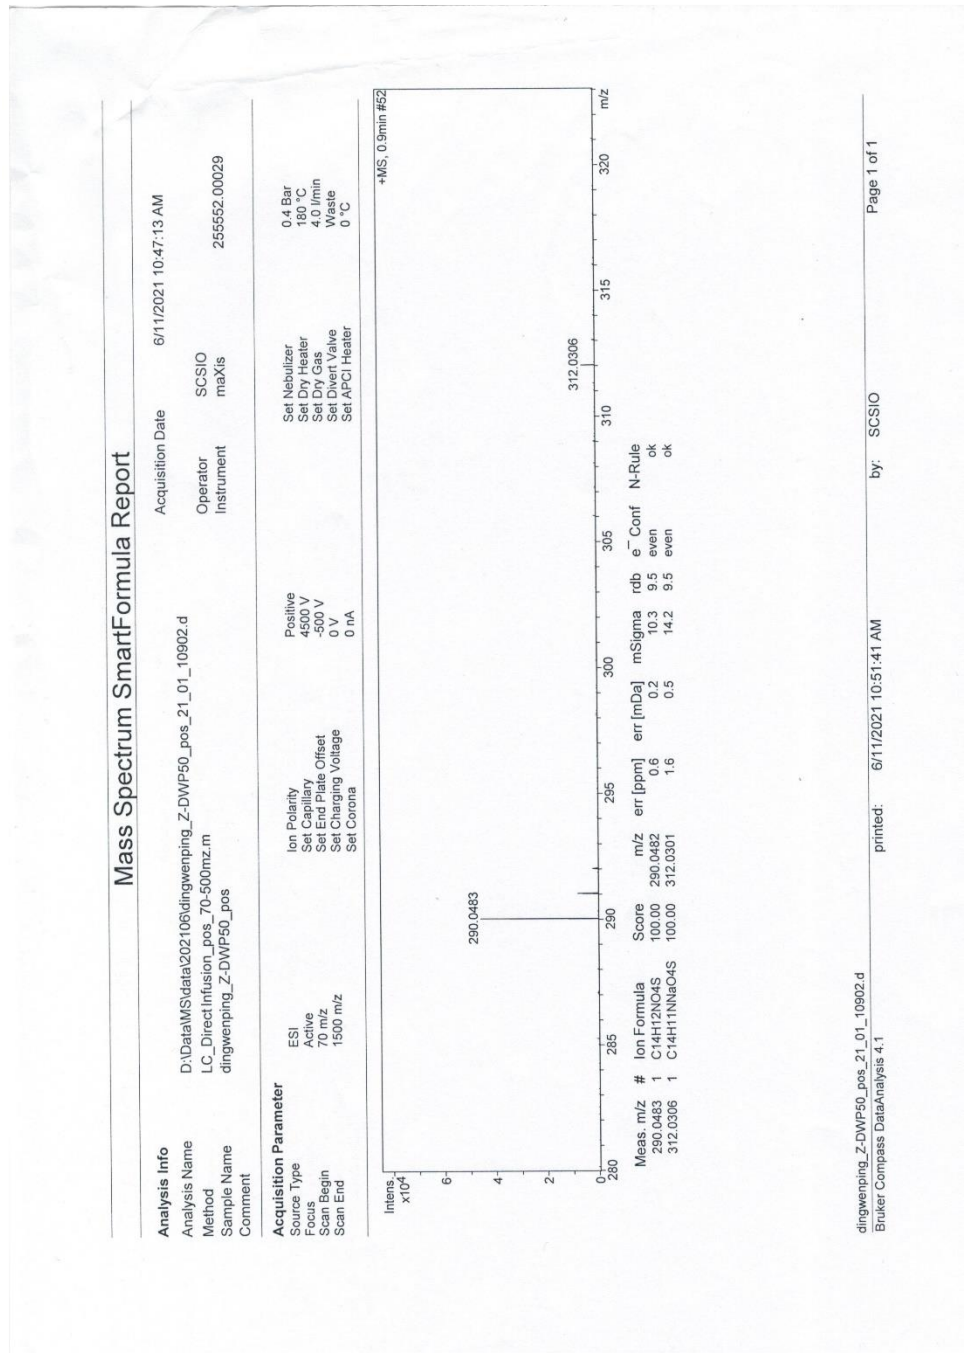

**Fig. S52**  $^1\text{H}$  NMR spectrum ( $\text{CD}_3\text{OD}$ , 700 MHz) of compound **5**

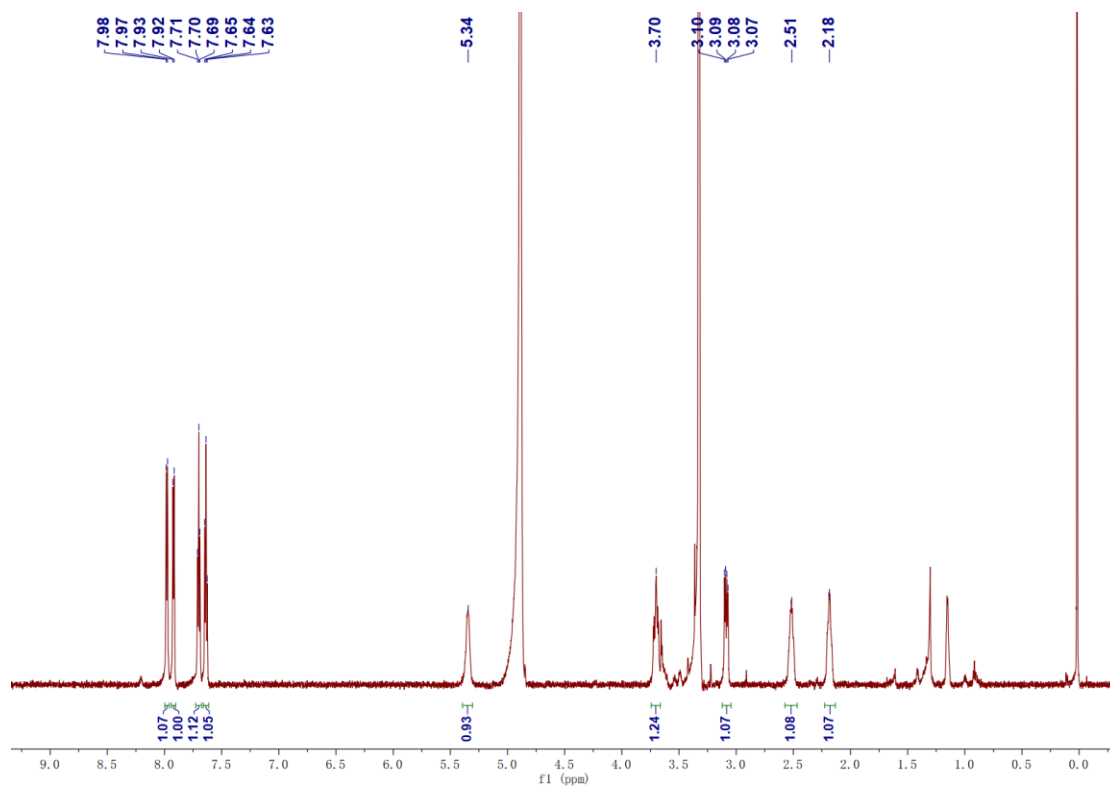

**Fig. S53**  $^{13}\text{C}$  NMR spectrum ( $\text{CD}_3\text{OD}$ , 176 MHz) of compound **5**

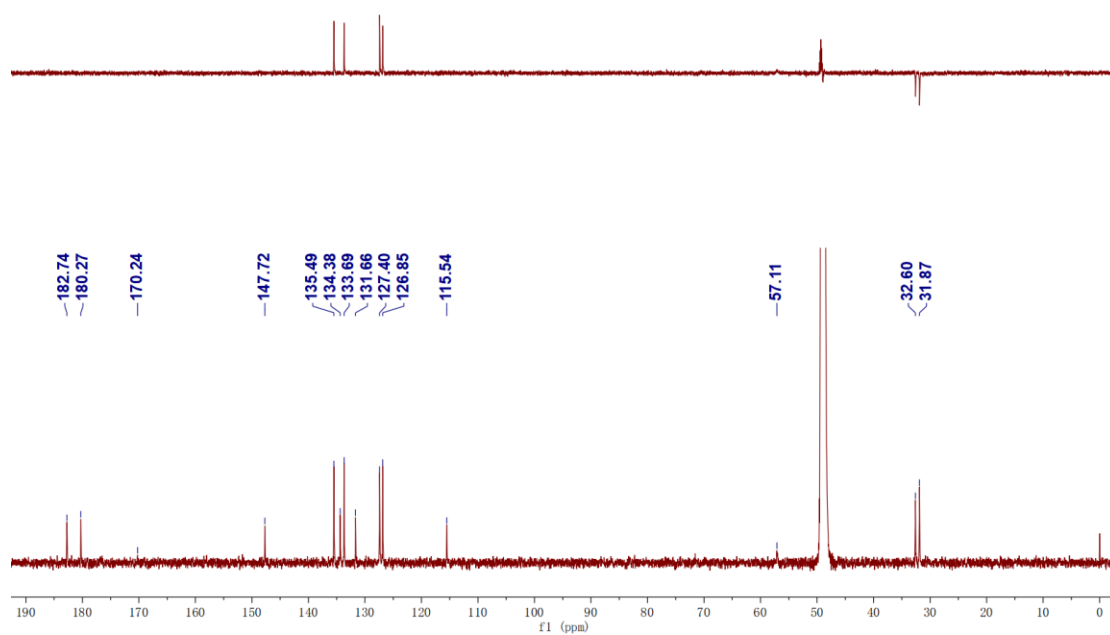

**Fig. S54** HSQC spectrum of compound **5**

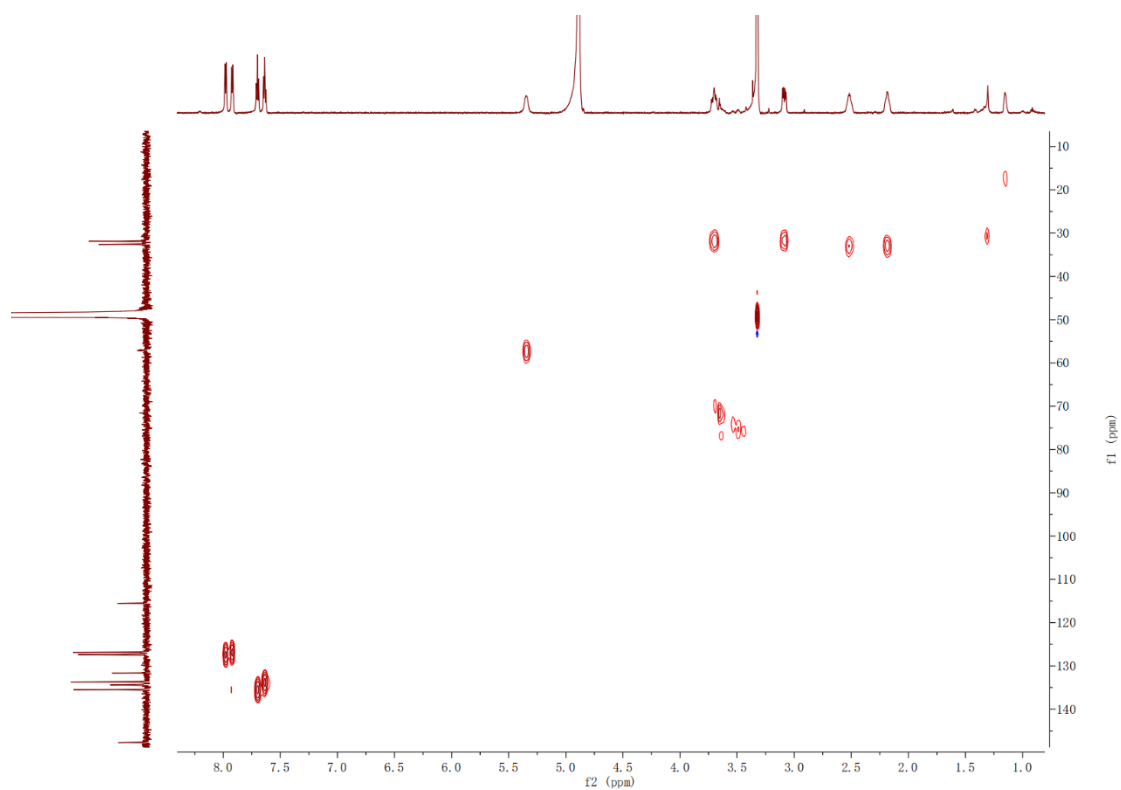

**Fig. S55** HMBC spectrum of compound **5**

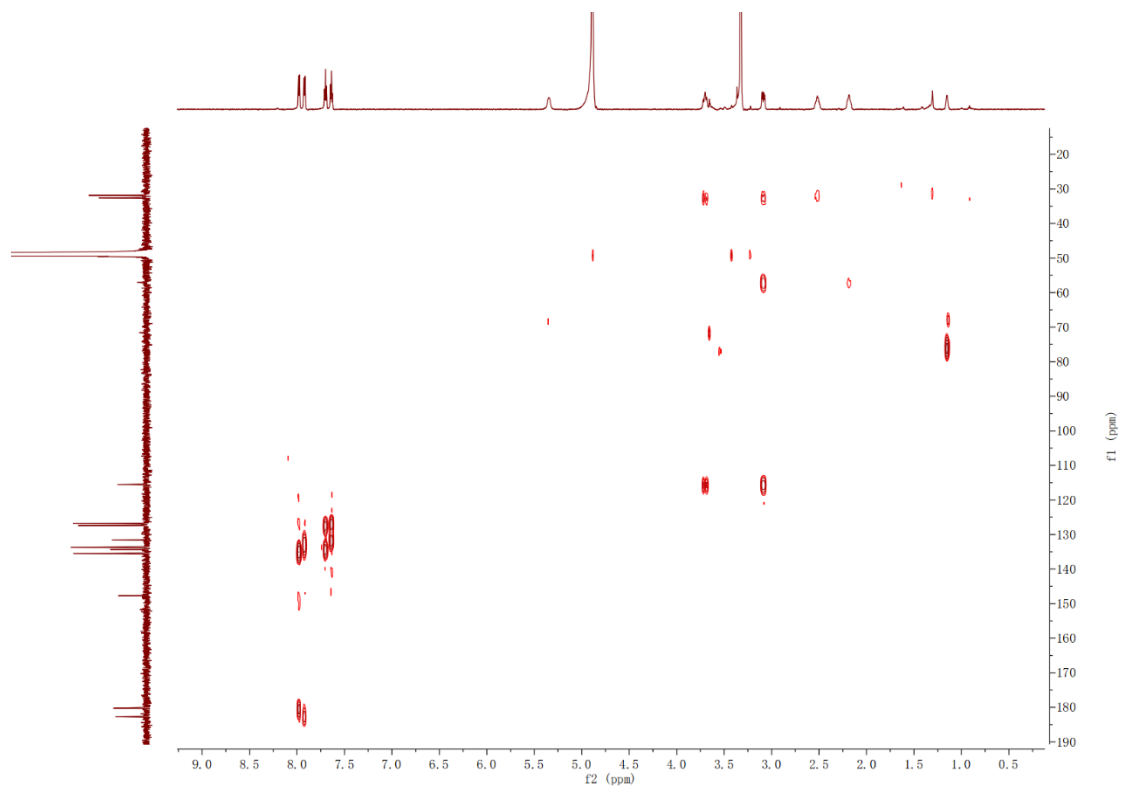

**Fig. S56**  $^1\text{H}$ – $^1\text{H}$  COSY spectrum of compound **5**

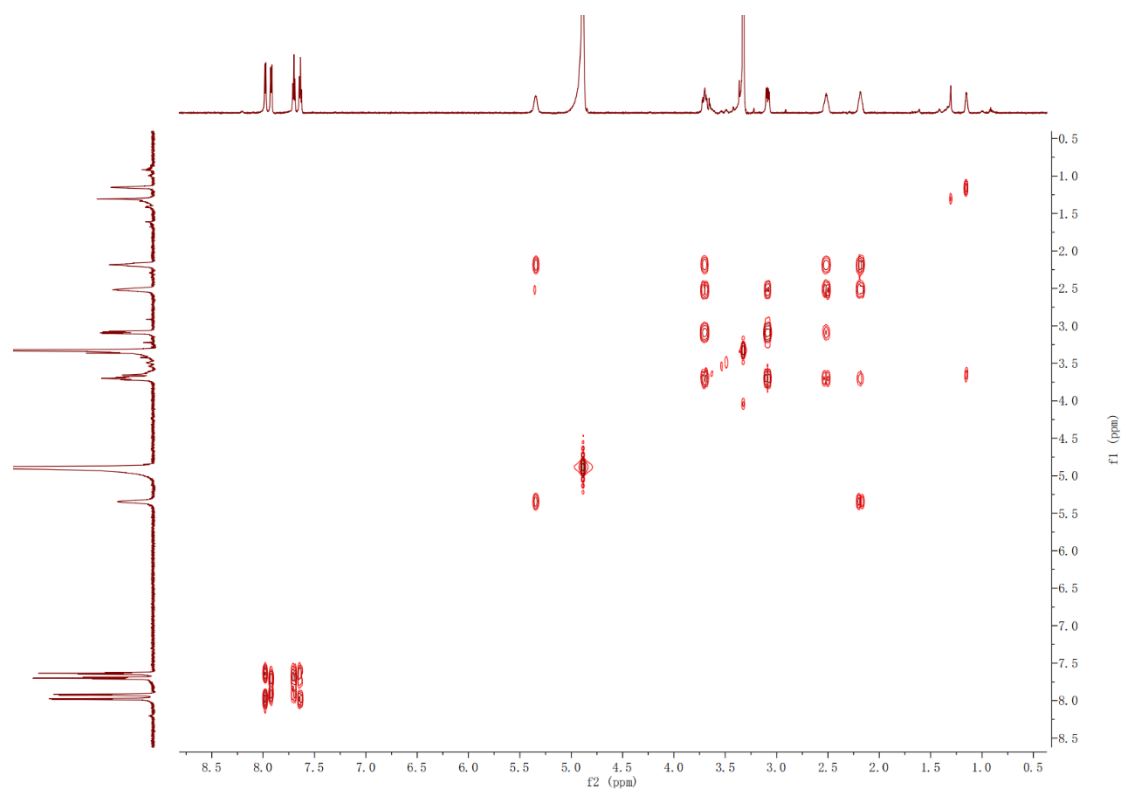

**Fig. S57 ESI-MS spectrum of compound 6**

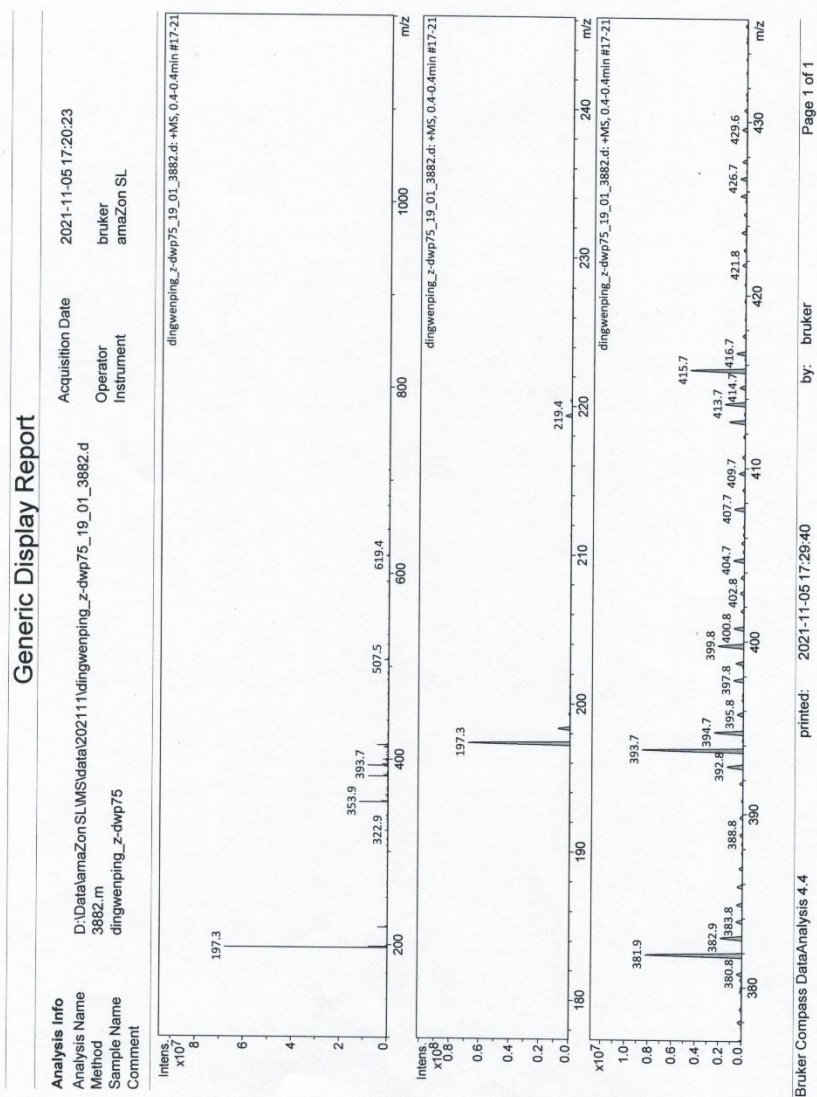

**Fig. S58**  $^1\text{H}$  NMR spectrum ( $\text{CD}_3\text{OD}$ , 500 MHz) of compound **6**

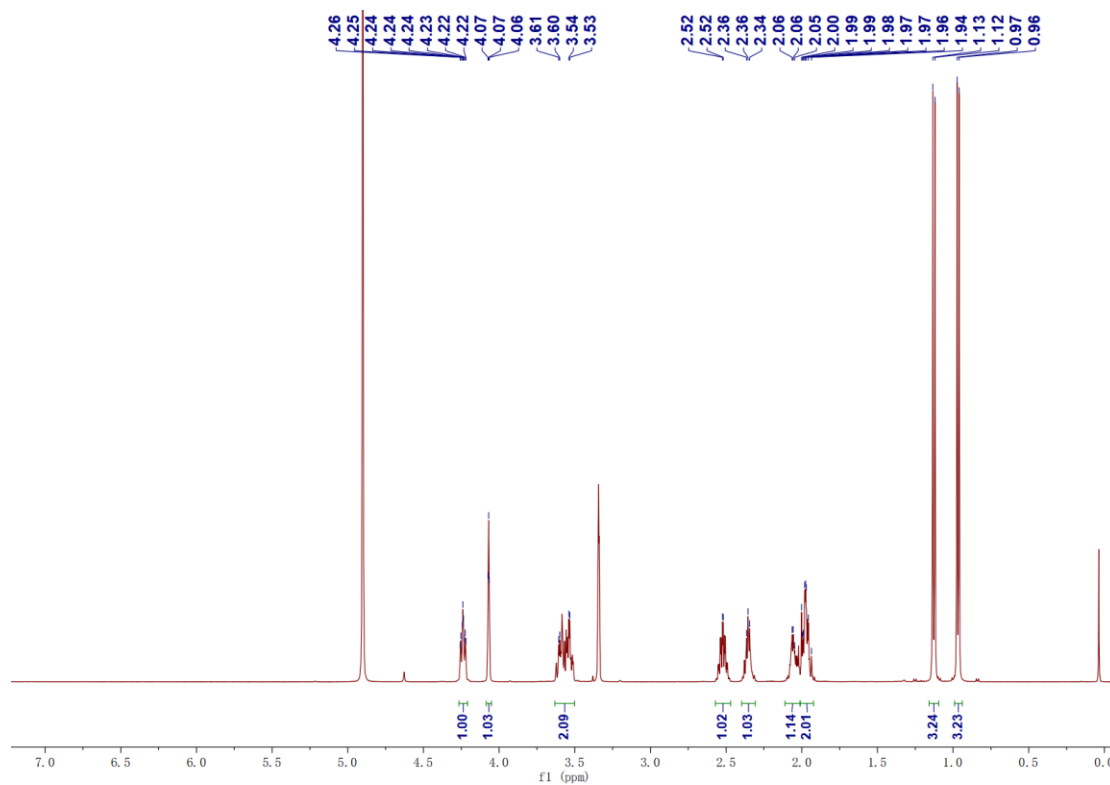

**Fig. S59**  $^{13}\text{C}$  NMR spectrum ( $\text{CD}_3\text{OD}$ , 126 MHz) of compound **6**

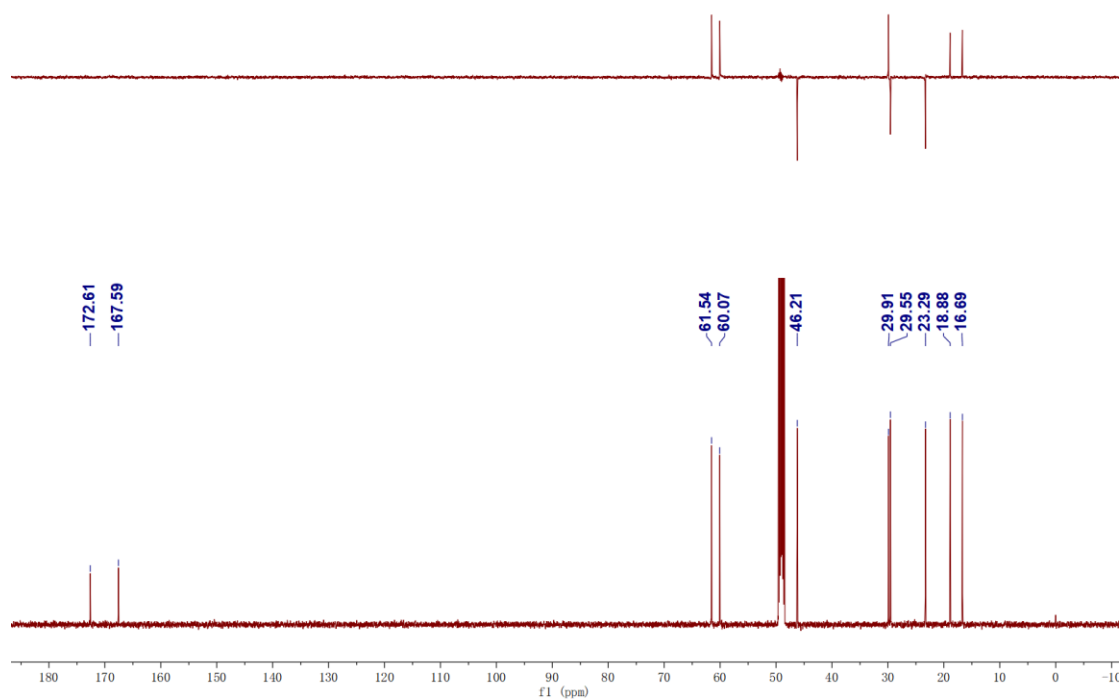

## Crystallographic data of compound 6

**Crystal Data** for  $C_{10}H_{16}N_2O_2$  ( $M=1569.98$  g/mol): orthorhombic, space group  $P2_12_12_1$  (no. 19),  $a = 5.61820(10)$  Å,  $b = 10.25990(10)$  Å,  $c = 34.2074(4)$  Å,  $V = 1971.79(5)$  Å<sup>3</sup>,  $Z = 8$ ,  $T = 99.99(10)$  K,  $\mu(\text{Cu K}\alpha) = 0.756$  mm<sup>-1</sup>,  $D_{\text{calc}} = 1.322$  g/cm<sup>3</sup>, 19431 reflections measured ( $5.166^\circ \leq 2\theta \leq 148.834^\circ$ ), 3939 unique ( $R_{\text{int}} = 0.0292$ ,  $R_{\text{sigma}} = 0.0222$ ) which were used in all calculations. The final  $R_1$  was 0.0283 ( $I > 2\sigma(I)$ ) and  $wR_2$  was 0.0720 (all data).

**Fig. S60** ESI-MS spectrum of compound 7

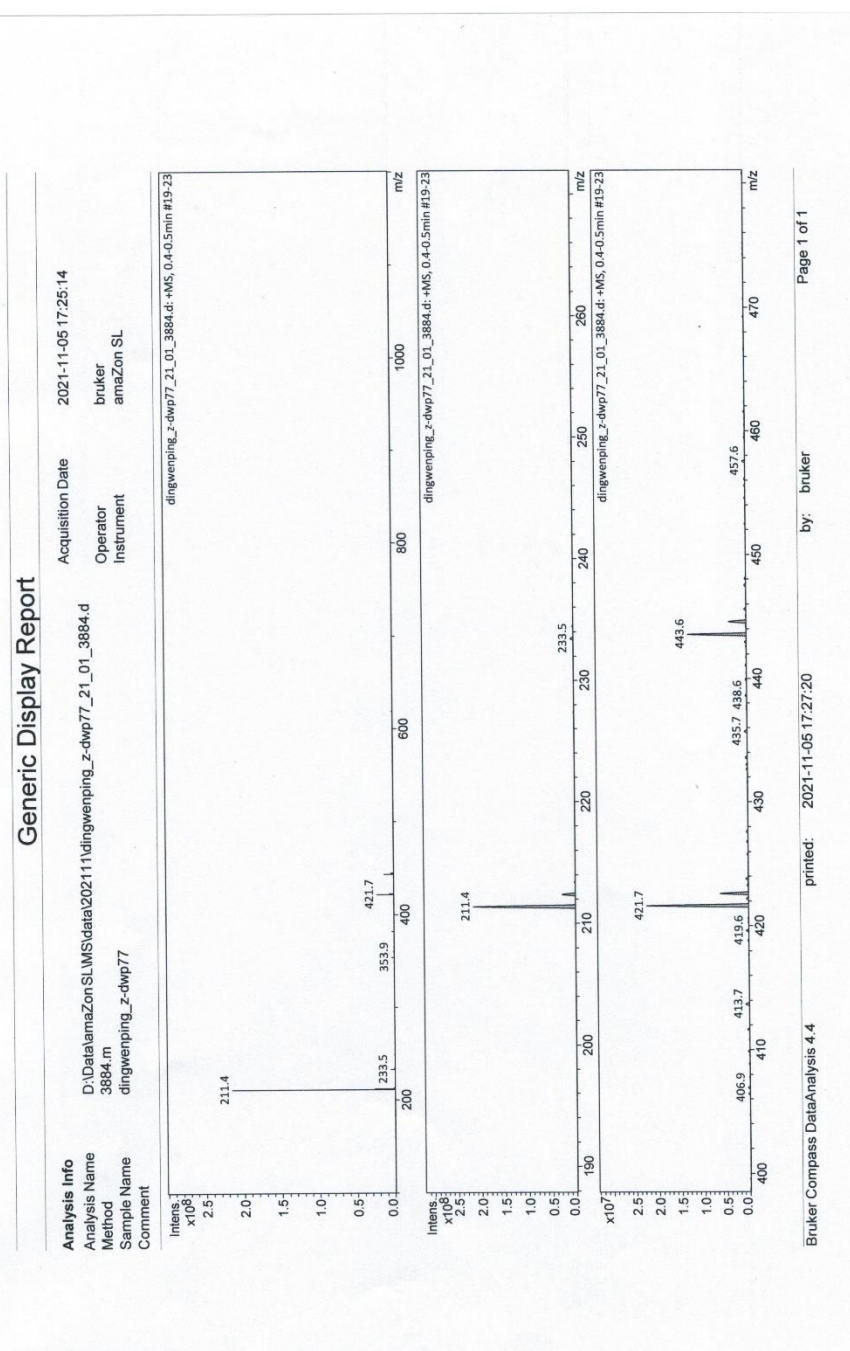

**Fig. S61**  $^1\text{H}$  NMR spectrum ( $\text{CD}_3\text{OD}$ , 500 MHz) of compound **7**

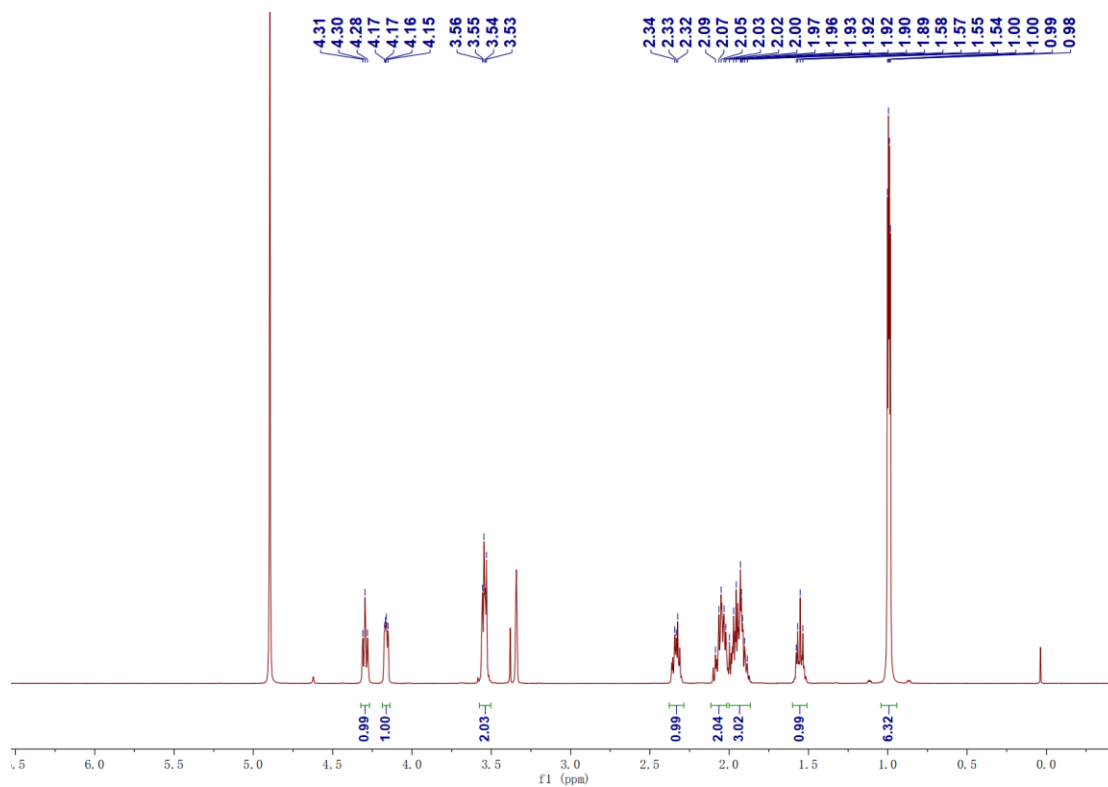

**Fig. S62**  $^{13}\text{C}$  NMR spectrum ( $\text{CD}_3\text{OD}$ , 126 MHz) of compound **7**

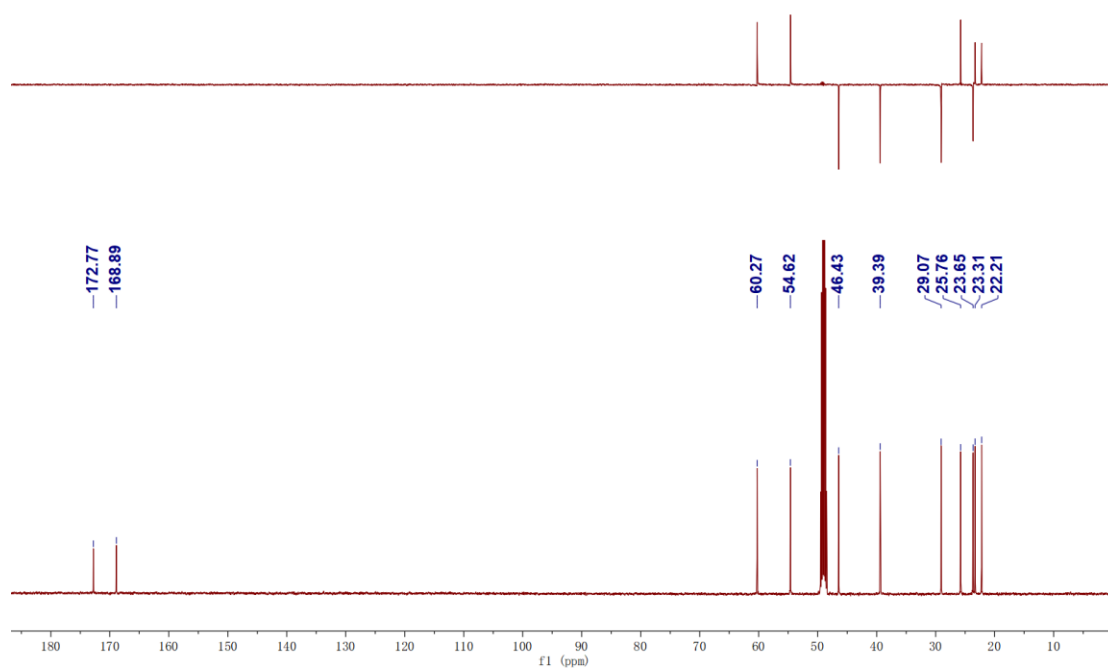



## Crystallographic data of compound 7

**Crystal Data** for  $C_{11}H_{18}N_2O_2$  ( $M=210.27$  g/mol): orthorhombic, space group  $P2_12_12_1$  (no. 19),  $a = 6.3034(2)$  Å,  $b = 9.2289(3)$  Å,  $c = 19.5991(7)$  Å,  $V = 1140.15(7)$  Å<sup>3</sup>,  $Z = 4$ ,  $T = 100.00(10)$  K,  $\mu(\text{Cu K}\alpha) = 0.686$  mm<sup>-1</sup>,  $D_{\text{calc}} = 1.225$  g/cm<sup>3</sup>, 10779 reflections measured ( $9.024^\circ \leq 2\theta \leq 147.842^\circ$ ), 2274 unique ( $R_{\text{int}} = 0.0609$ ,  $R_{\text{sigma}} = 0.0335$ ) which were used in all calculations. The final  $R_1$  was 0.0547 ( $I > 2\sigma(I)$ ) and  $wR_2$  was 0.1469 (all data).

**Fig. S63** ESI-MS spectrum of compound 8

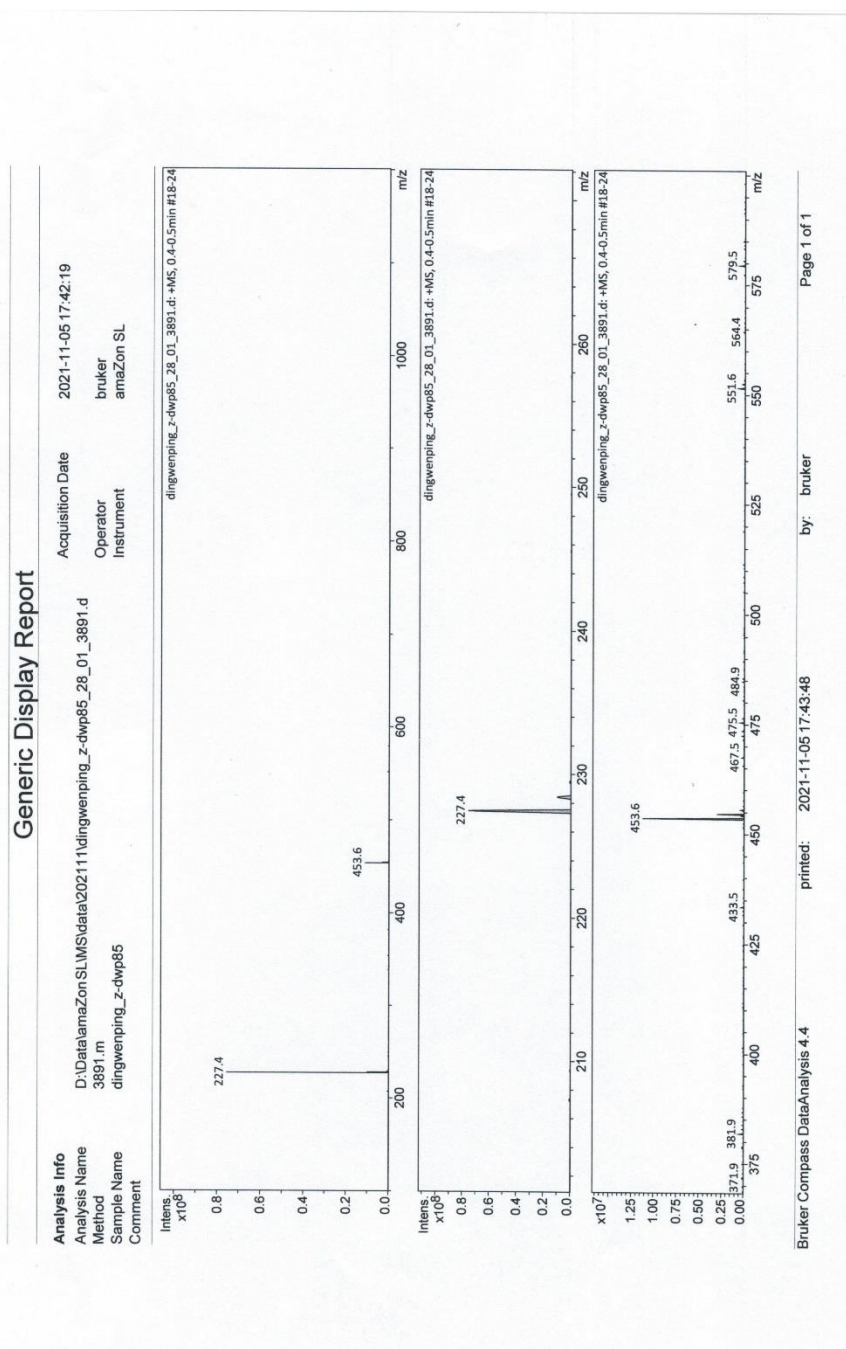

**Fig. S64**  $^1\text{H}$  NMR spectrum ( $\text{CD}_3\text{OD}$ , 500 MHz) of compound **8**

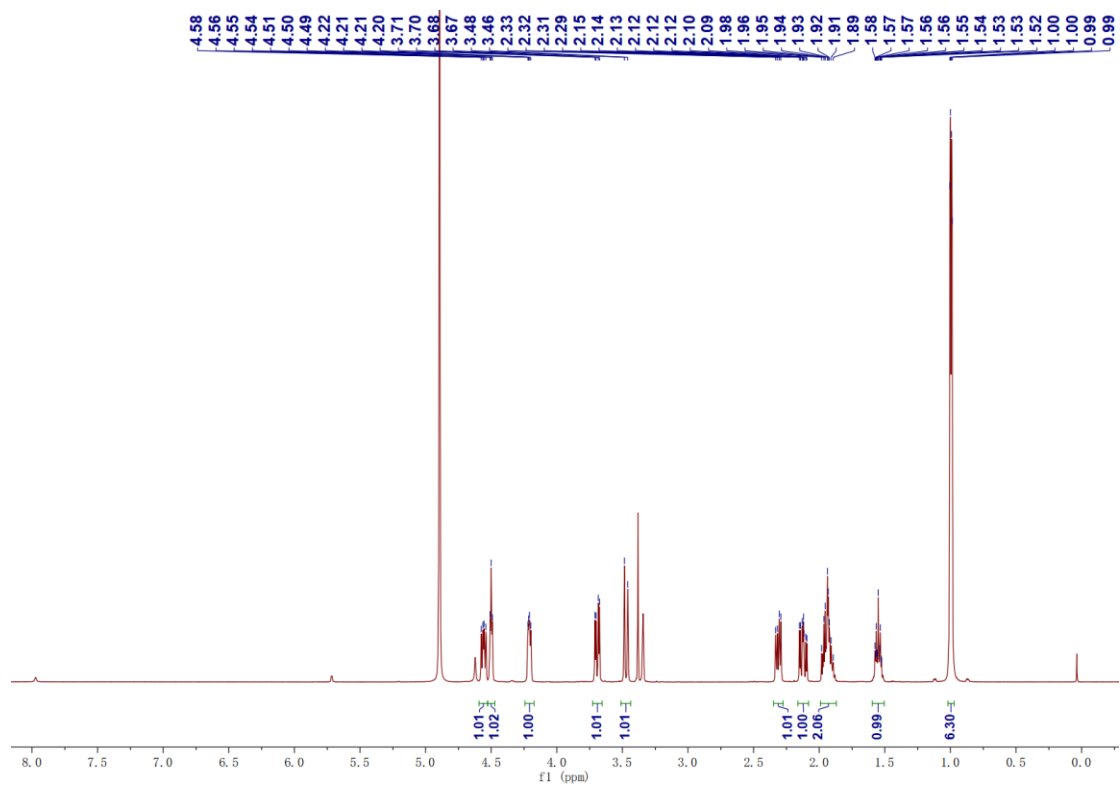

**Fig. S65**  $^{13}\text{C}$  NMR spectrum ( $\text{CD}_3\text{OD}$ , 126 MHz) of compound **8**

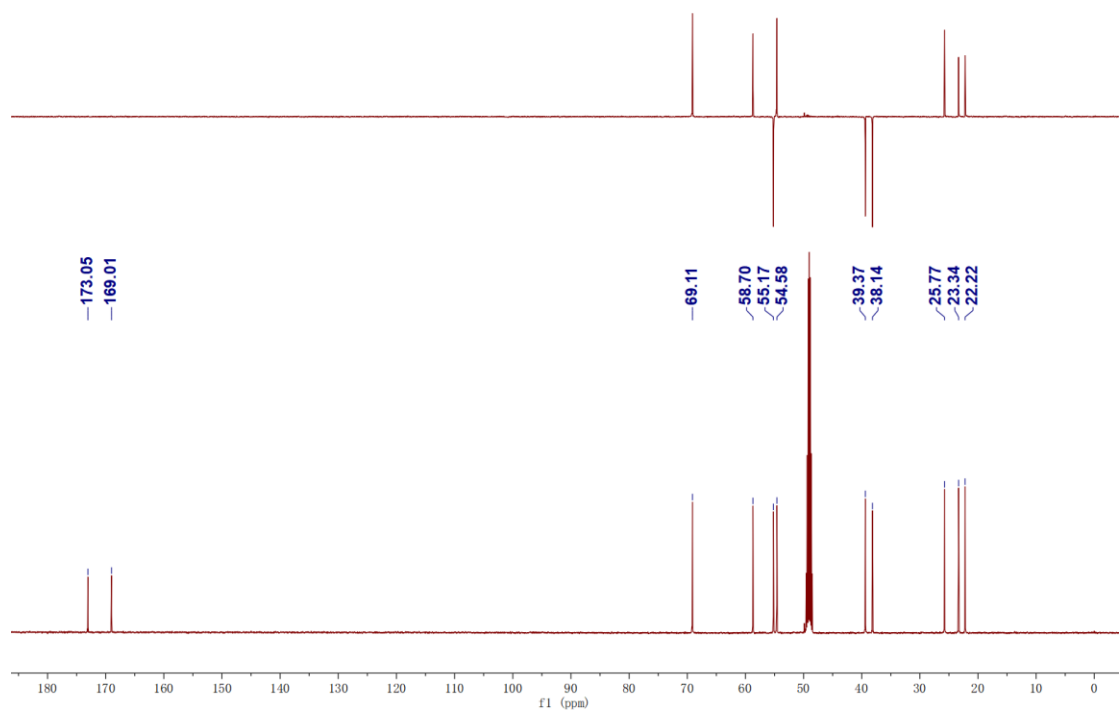

## Crystallographic data of compound 8

**Crystal Data** for  $C_{11}H_{18}N_2O_3$  ( $M = 226.27$  g/mol): orthorhombic, space group  $P2_12_12_1$  (no. 19),  $a = 6.28190(10)$  Å,  $b = 9.4412(2)$  Å,  $c = 19.6668(3)$  Å,  $V = 1166.41(4)$  Å<sup>3</sup>,  $Z = 4$ ,  $T = 100.00(10)$  K,  $\mu(\text{Cu K}\alpha) = 0.775$  mm<sup>-1</sup>,  $D_{\text{calc}} = 1.289$  g/cm<sup>3</sup>, 5357 reflections measured ( $8.992^\circ \leq 2\theta \leq 148.308^\circ$ ), 2286 unique ( $R_{\text{int}} = 0.0248$ ,  $R_{\text{sigma}} = 0.0276$ ) which were used in all calculations. The final  $R_1$  was 0.0296 ( $I > 2\sigma(I)$ ) and  $wR_2$  was 0.0781 (all data).

**Fig. S66** ESI-MS spectrum of compound 9

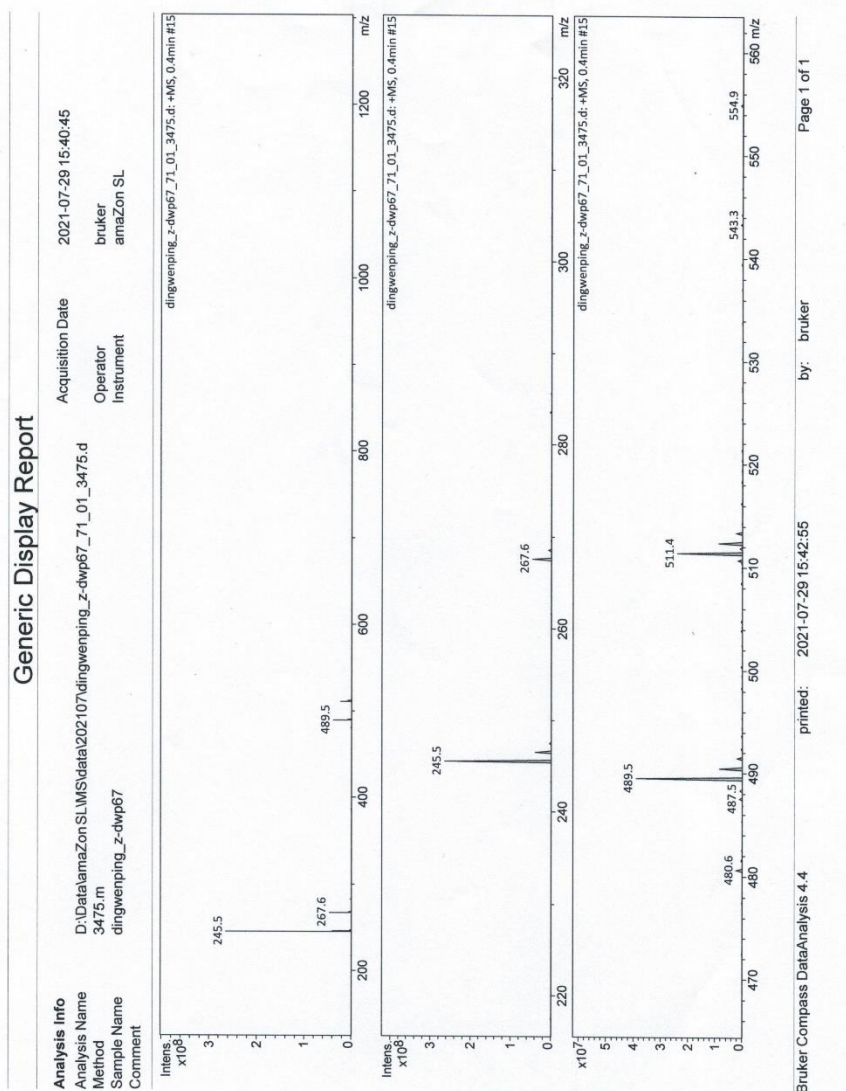

**Fig. S67**  $^1\text{H}$  NMR spectrum ( $\text{CD}_3\text{OD}$ , 500 MHz) of compound **9**

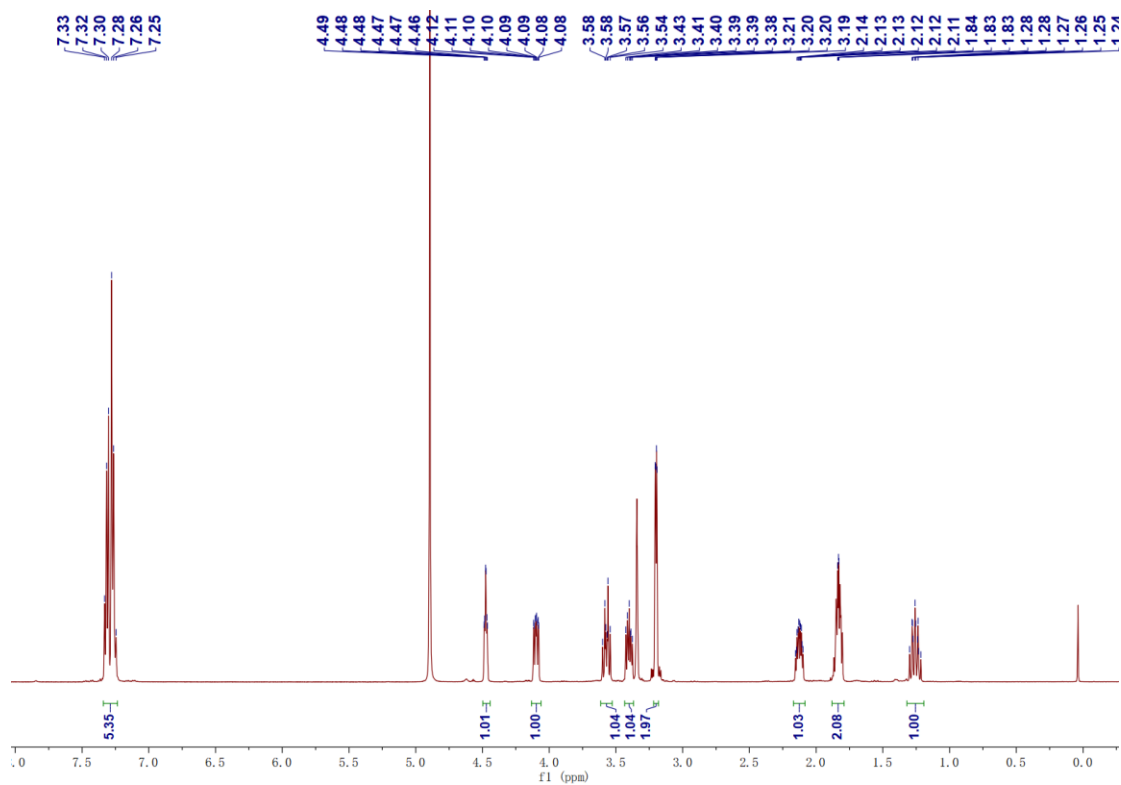

**Fig. S68**  $^{13}\text{C}$  NMR spectrum ( $\text{CD}_3\text{OD}$ , 126 MHz) of compound **9**

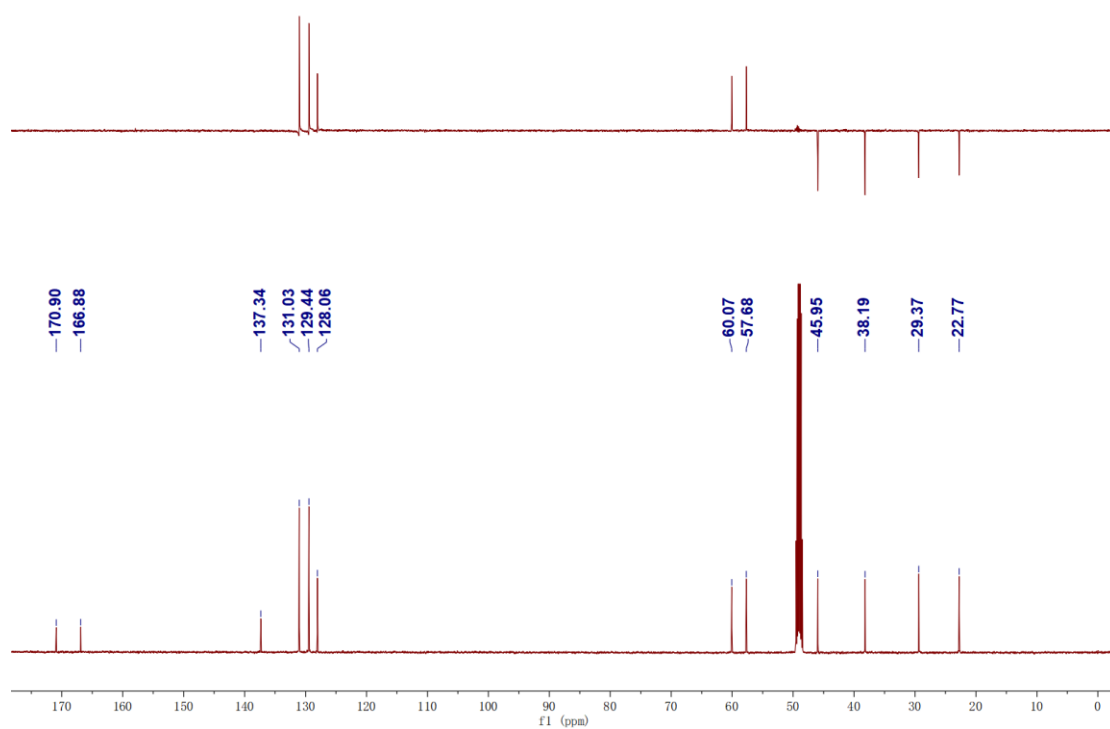

## Crystallographic data of compound 9

**Crystal Data** for  $C_{14}H_{16}N_2O_2$  ( $M = 244.29$  g/mol): monoclinic, space group  $P2_1$  (no. 4),  $a = 11.9476(2)$  Å,  $b = 8.86980(10)$  Å,  $c = 12.3429(2)$  Å,  $\beta = 109.501(2)^\circ$ ,  $V = 1232.98(3)$  Å<sup>3</sup>,  $Z = 4$ ,  $T = 99.99(10)$  K,  $\mu(\text{Cu K}\alpha) = 0.721$  mm<sup>-1</sup>,  $D_{\text{calc}} = 1.316$  g/cm<sup>3</sup>, 22922 reflections measured ( $7.598^\circ \leq 2\theta \leq 148.674^\circ$ ), 4840 unique ( $R_{\text{int}} = 0.0468$ ,  $R_{\text{sigma}} = 0.0353$ ) which were used in all calculations. The final  $R_1$  was 0.0453 ( $I > 2\sigma(I)$ ) and  $wR_2$  was 0.1227 (all data).

**Fig. S69** ESI-MS spectrum of compound 10

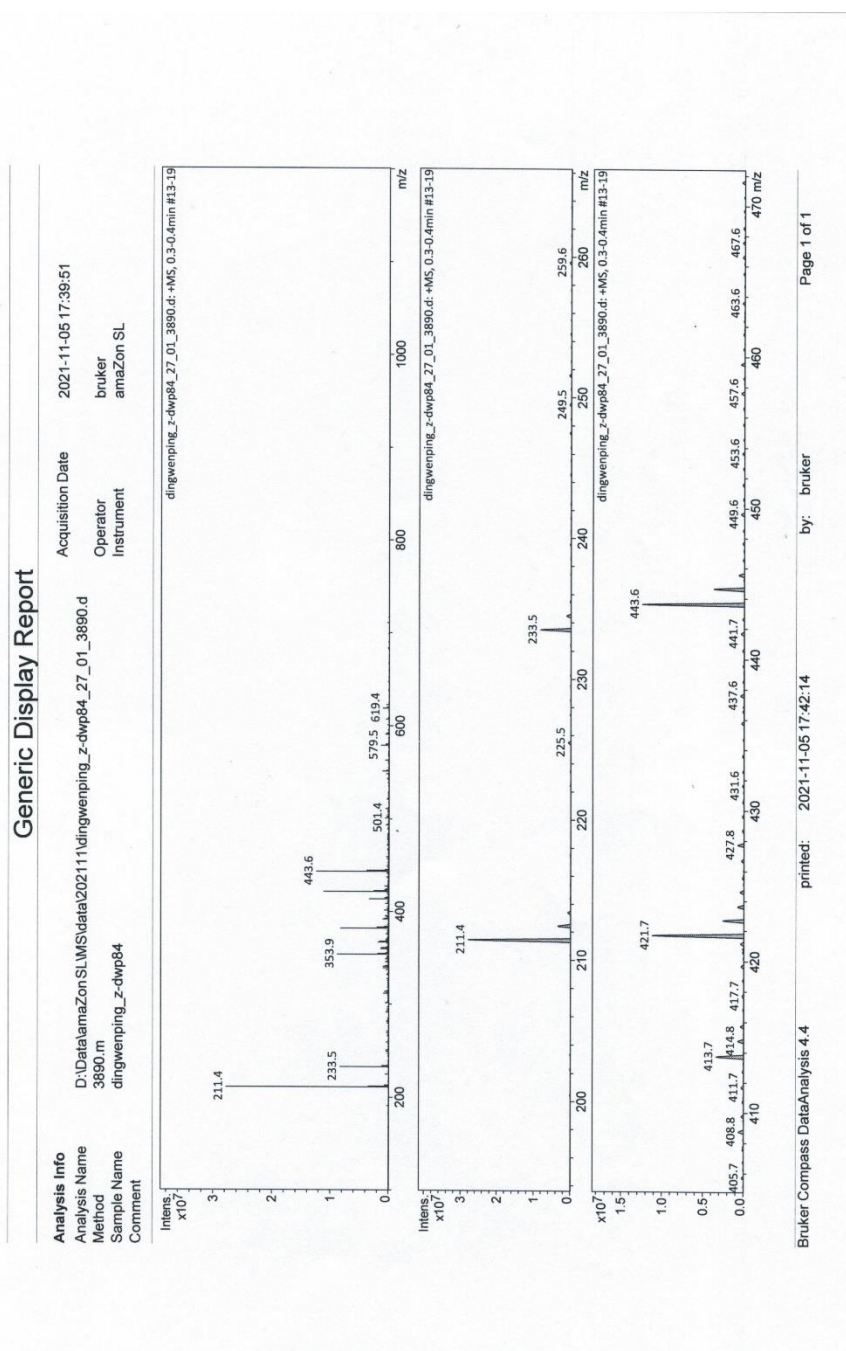

**Fig. S70**  $^1\text{H}$  NMR spectrum ( $\text{CD}_3\text{OD}$ , 700 MHz) of compound **10**

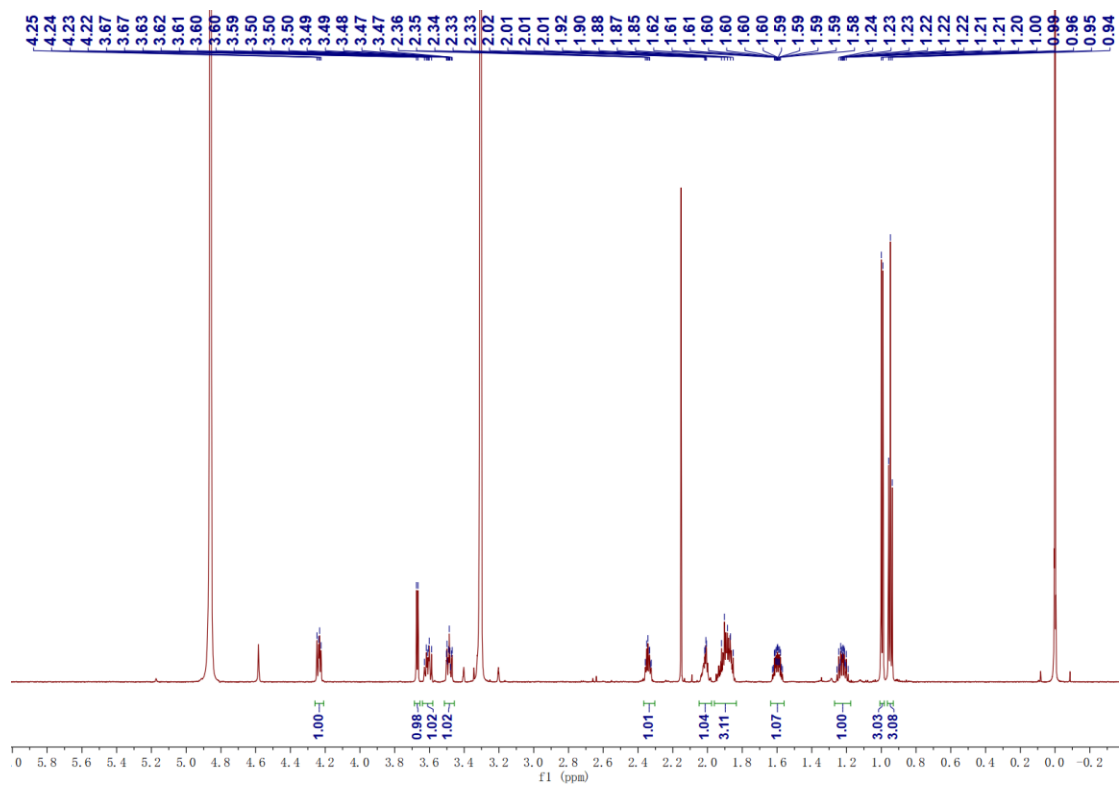

**Fig. S71**  $^{13}\text{C}$  NMR spectrum ( $\text{CD}_3\text{OD}$ , 176 MHz) of compound **10**

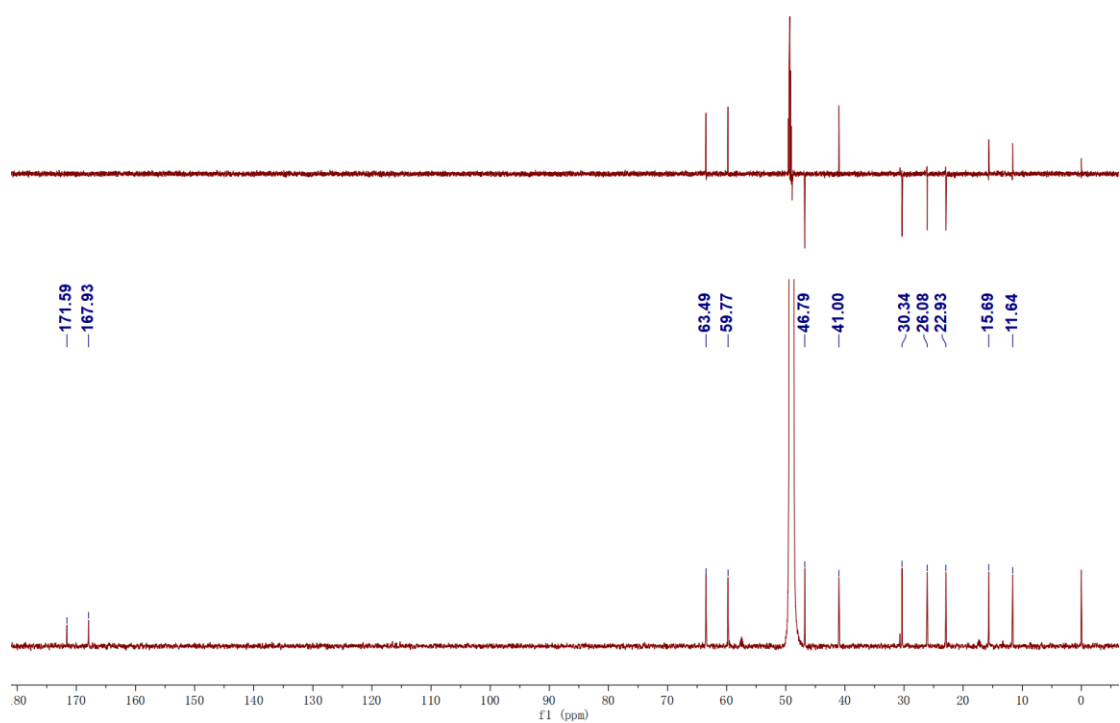

**Fig. S72** ESI-MS spectrum of compound **11**

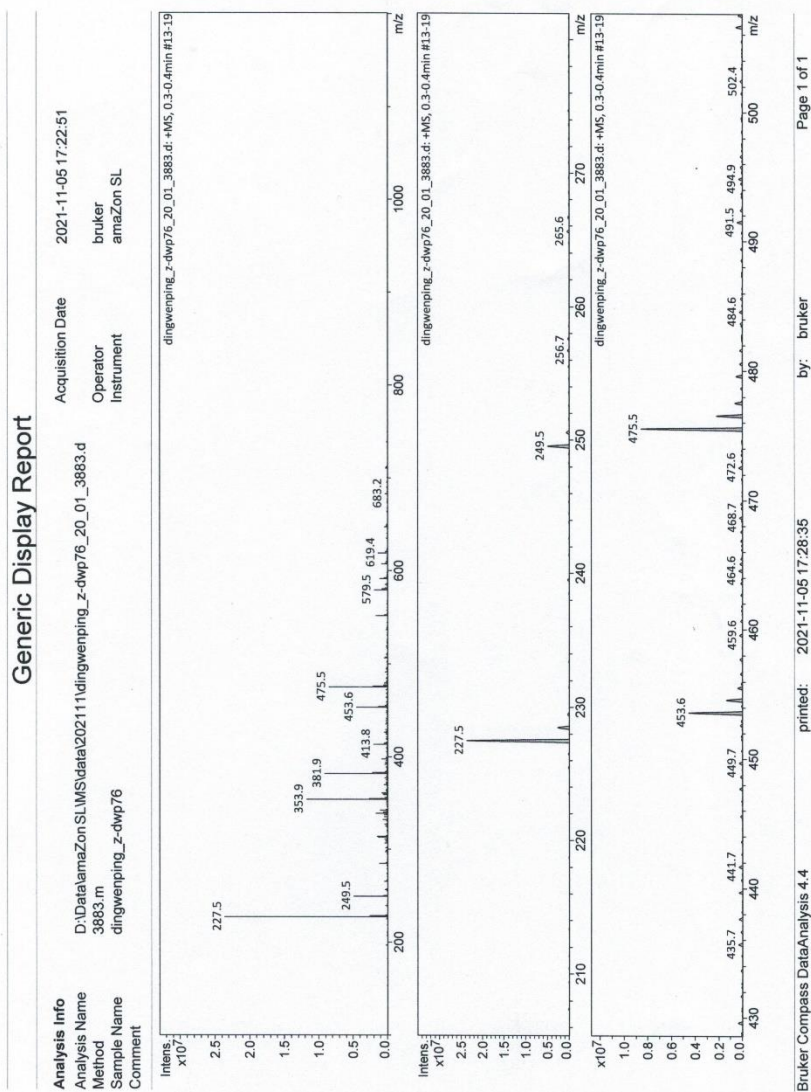



**Fig. S73**  $^1\text{H}$  NMR spectrum ( $\text{CD}_3\text{OD}$ , 700 MHz) of compound **11**

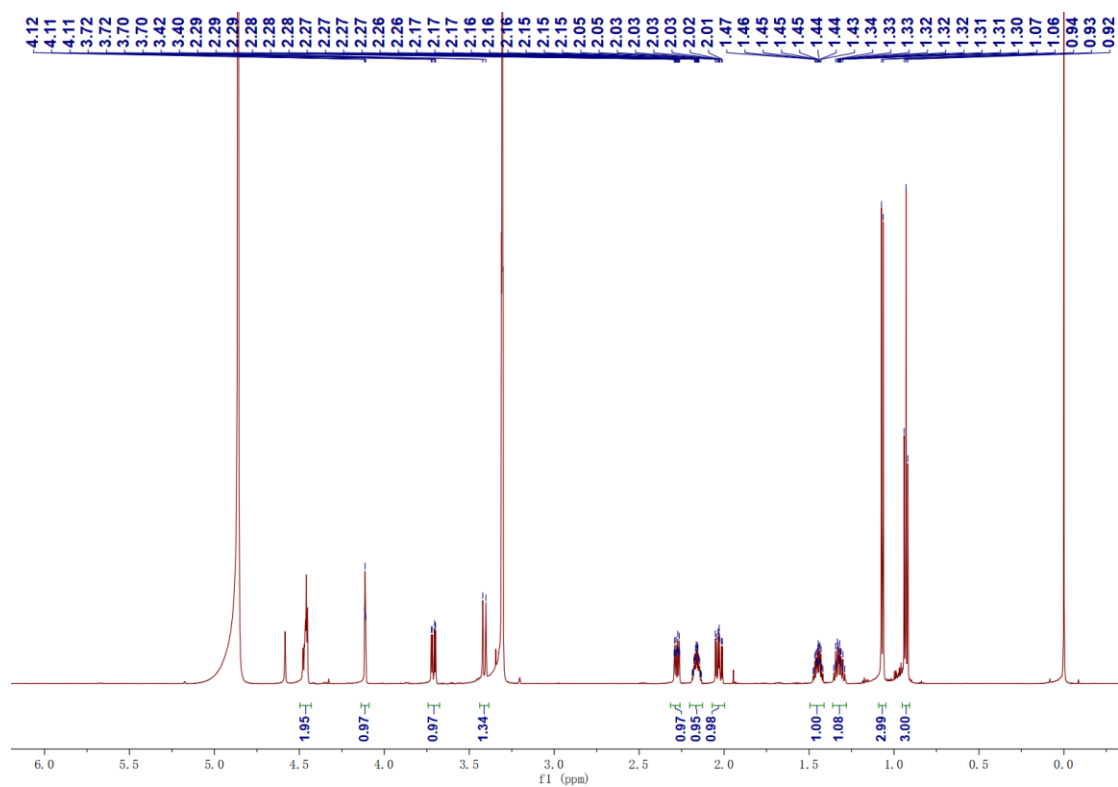

**Fig. S74**  $^{13}\text{C}$  NMR spectrum ( $\text{CD}_3\text{OD}$ , 176 MHz) of compound **11**

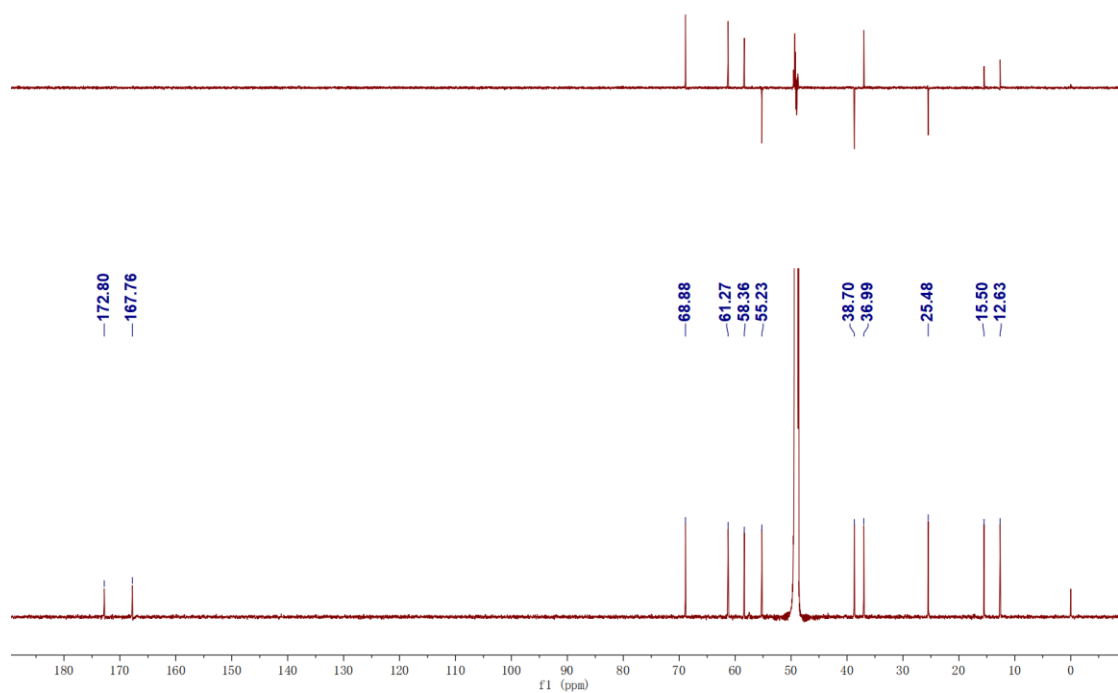



**Fig. S75** ESI-MS spectrum of compound **12**

# Generic Display Report

**Analysis Info**  
 Analysis Name  
 Method  
 Sample Name  
 Comment

D:\Data\amaZonSL\MS\data\202111\dingwenping\_z-dwp86\_29\_01\_3892.d  
 3892.m  
 dingwenping\_z-dwp86

Acquisition Date  
 Operator  
 Instrument

2021-11-05 17:44:48  
 bruker  
 amaZon SL

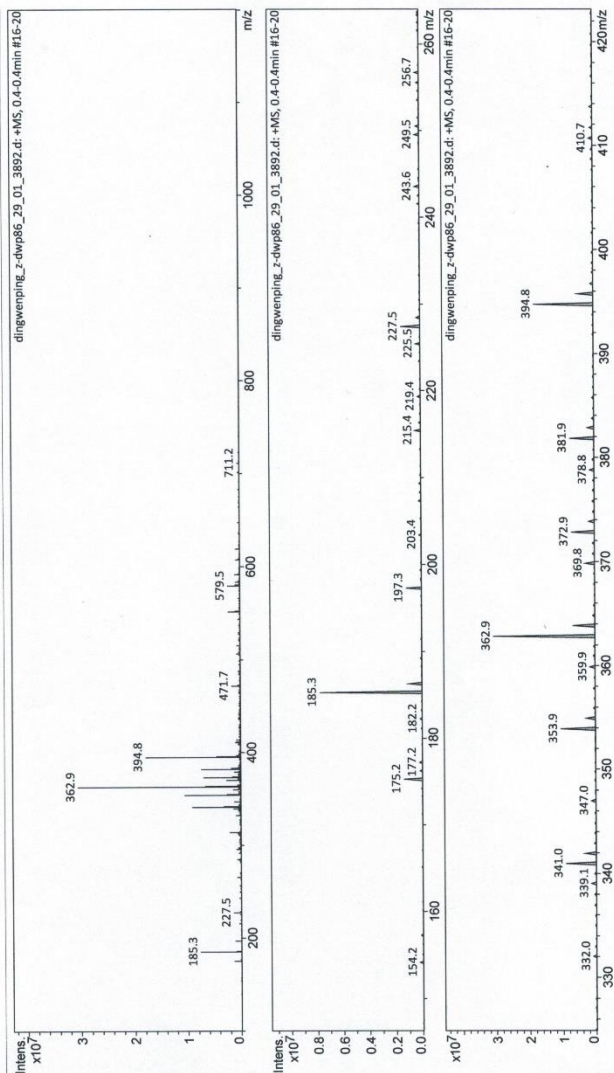

**Fig. S76**  $^1\text{H}$  NMR spectrum ( $\text{CD}_3\text{OD}$ , 700 MHz) of compound **12**

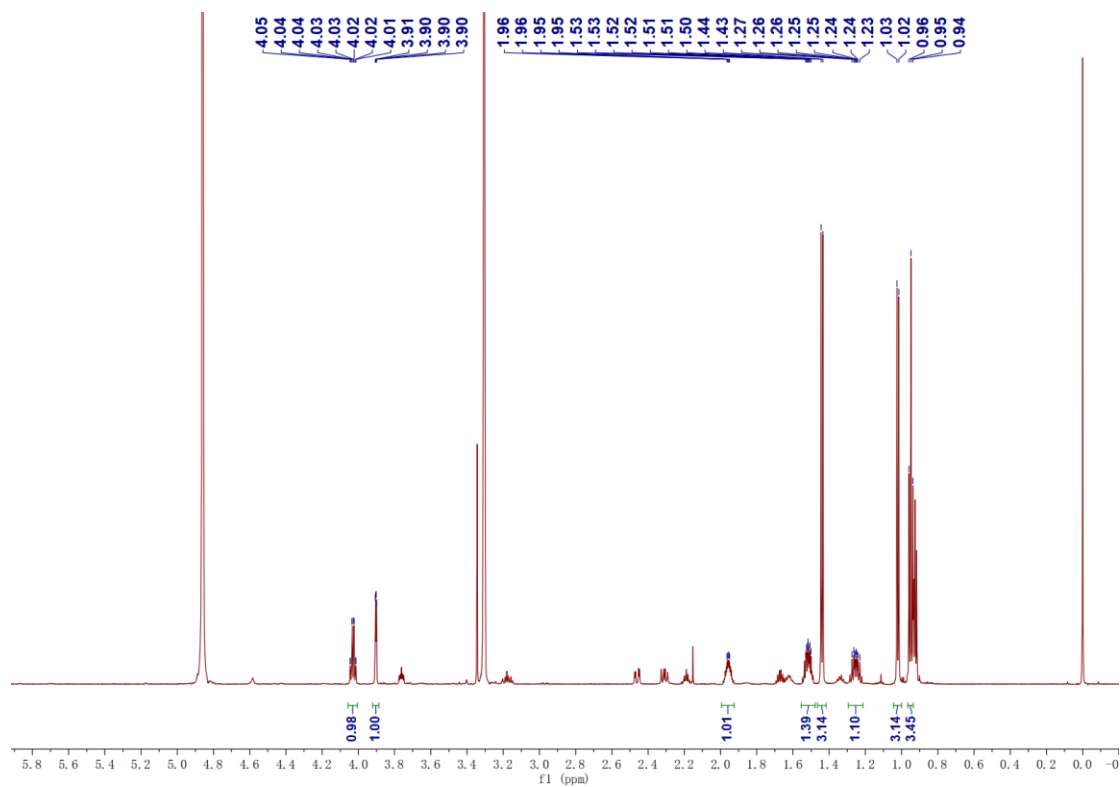

**Fig. S77**  $^{13}\text{C}$  NMR spectrum ( $\text{CD}_3\text{OD}$ , 176 MHz) of compound **12**

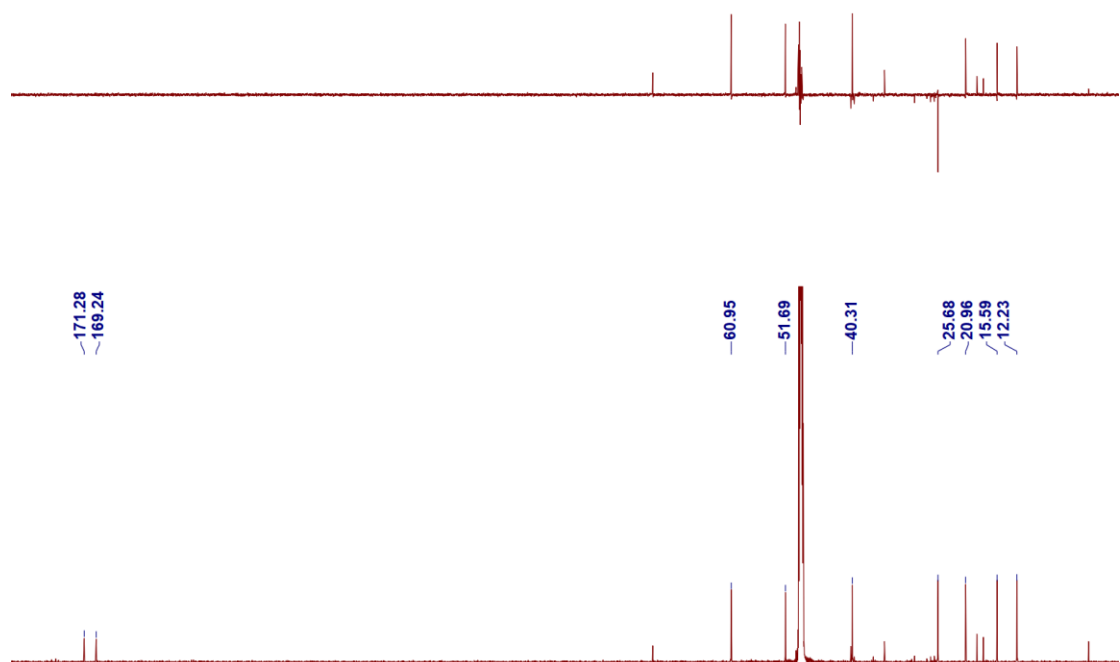

**Fig. S78 ESI-MS spectrum of compound 13**

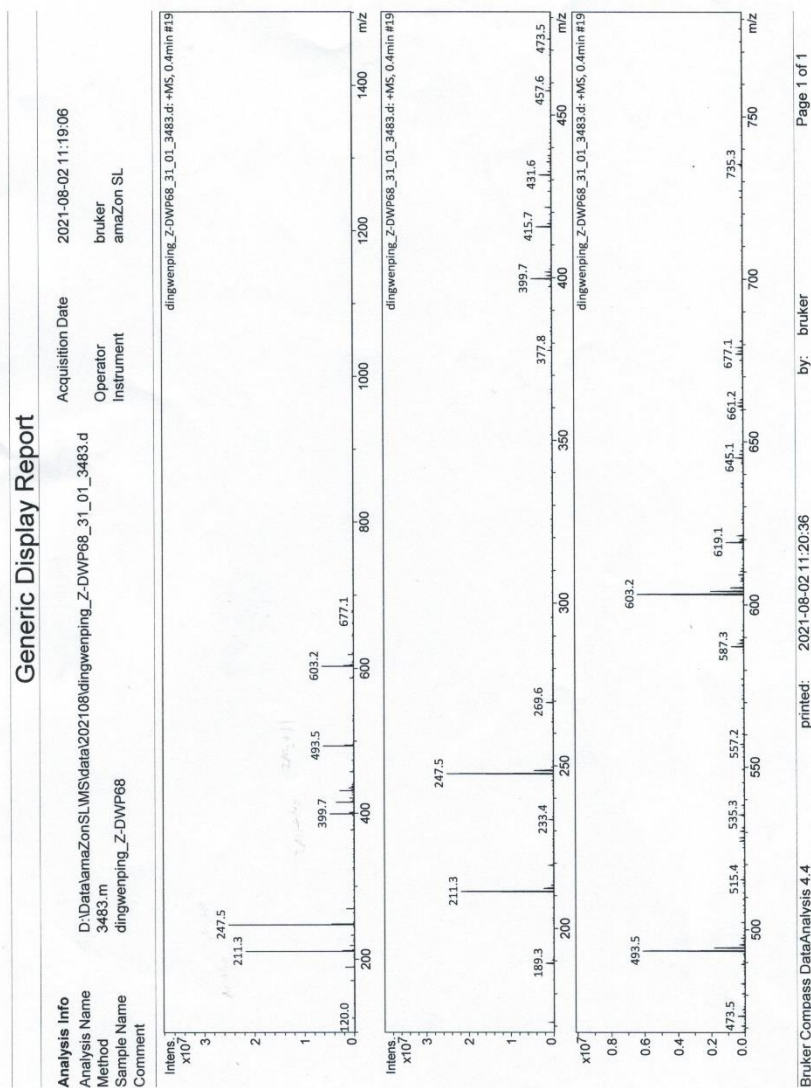

Structure of impurity:

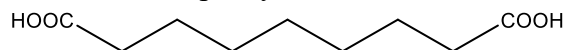

Nonanedioic acid

**Fig. S79**  $^1\text{H}$  NMR spectrum ( $\text{CD}_3\text{OD}$ , 700 MHz) of compound **13**

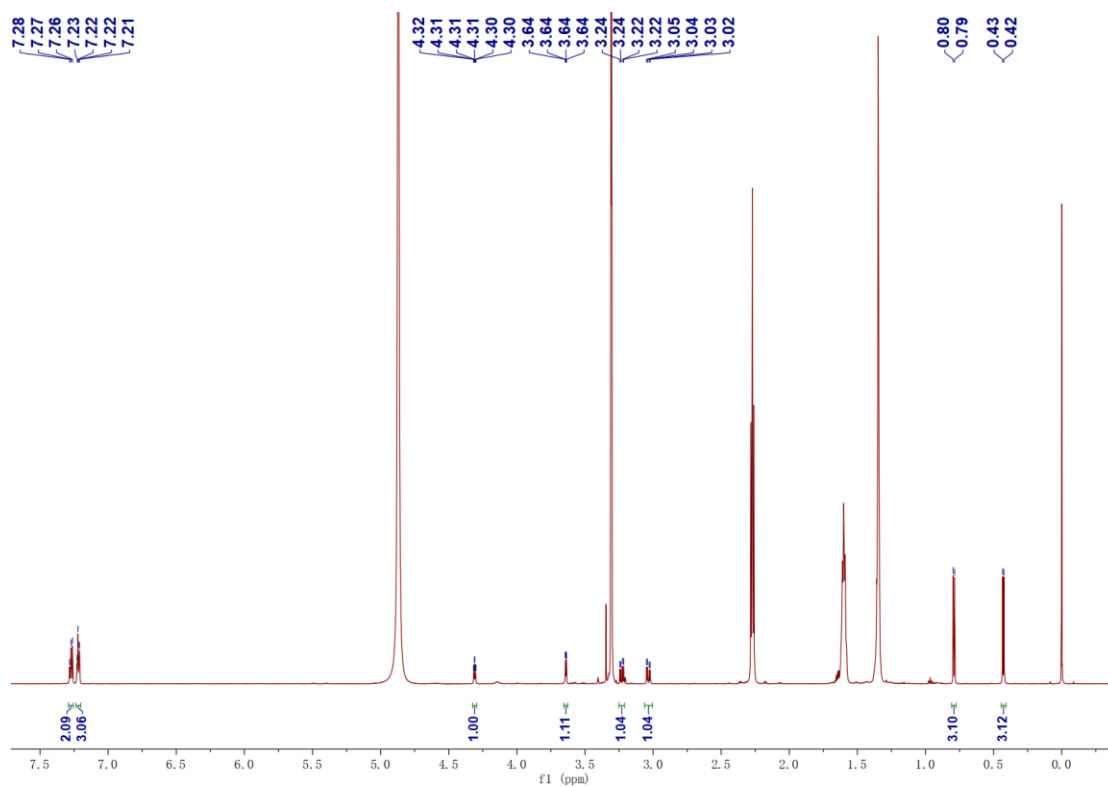

**Fig. S80**  $^{13}\text{C}$  NMR spectrum ( $\text{CD}_3\text{OD}$ , 176 MHz) of compound **13**

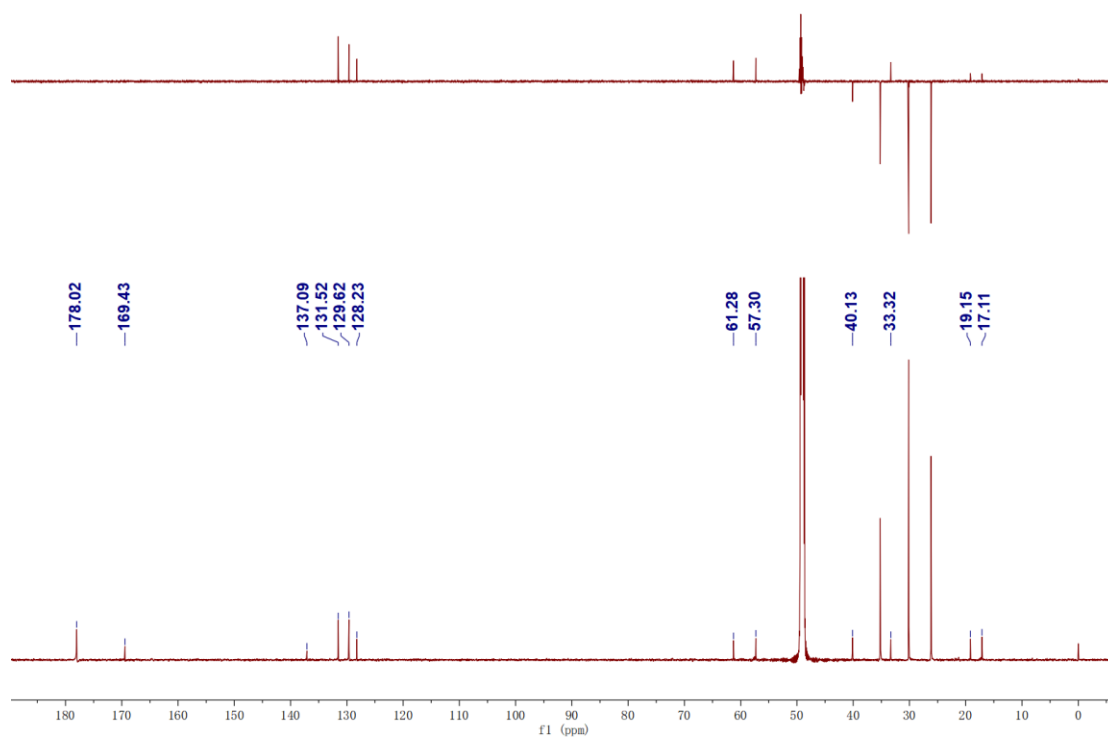

**Fig. S81** ESI-MS spectrum of compound **14**

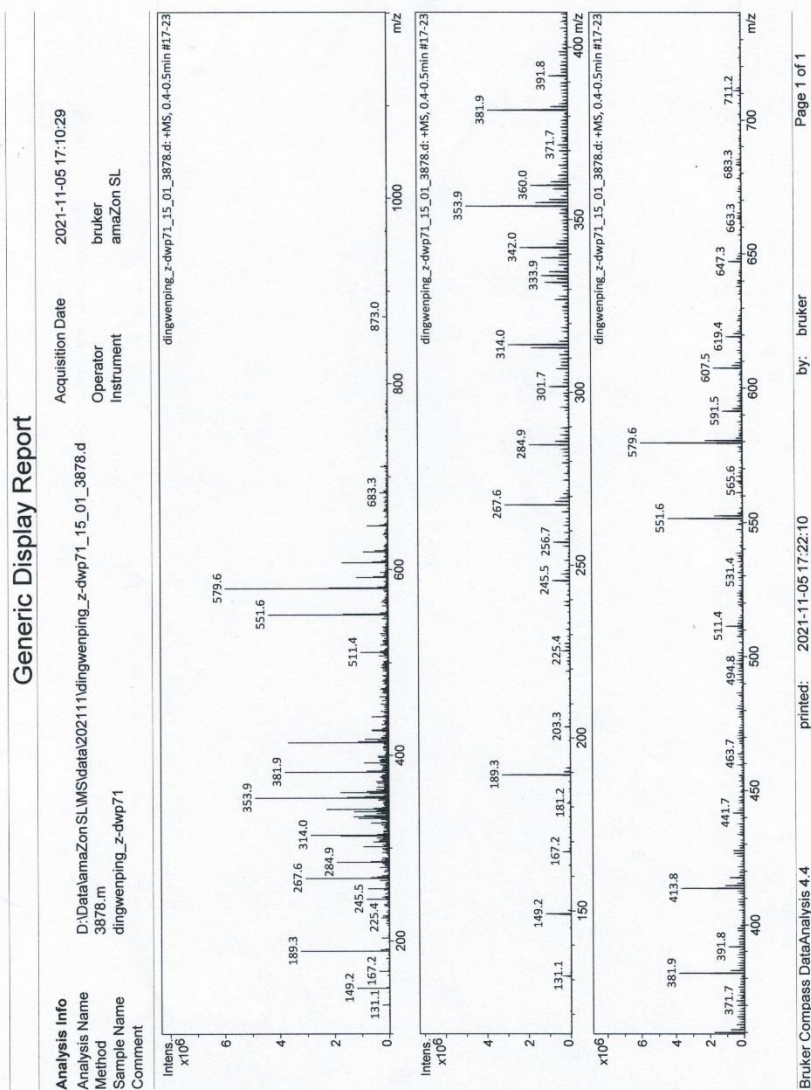

**Fig. S82**  $^1\text{H}$  NMR spectrum ( $\text{CD}_3\text{Cl}$ , 700 MHz) of compound **14**

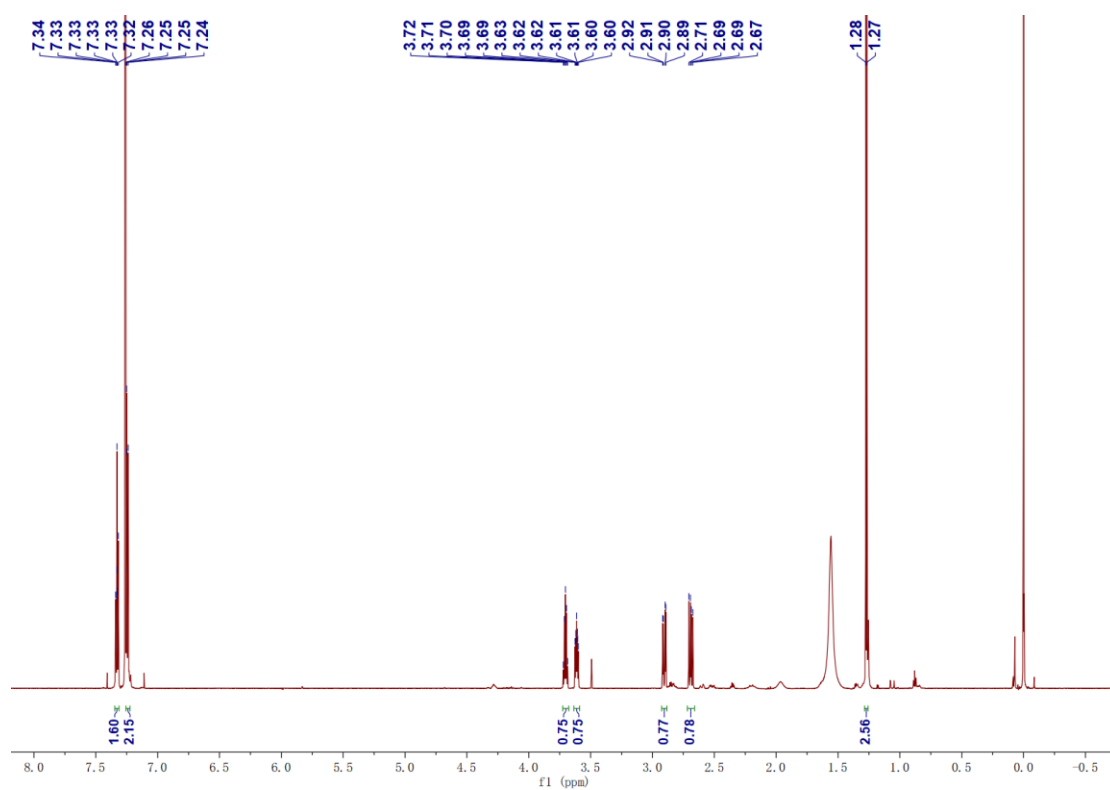

**Fig. S83**  $^{13}\text{C}$  NMR spectrum ( $\text{CD}_3\text{Cl}$ , 176 MHz) of compound **14**

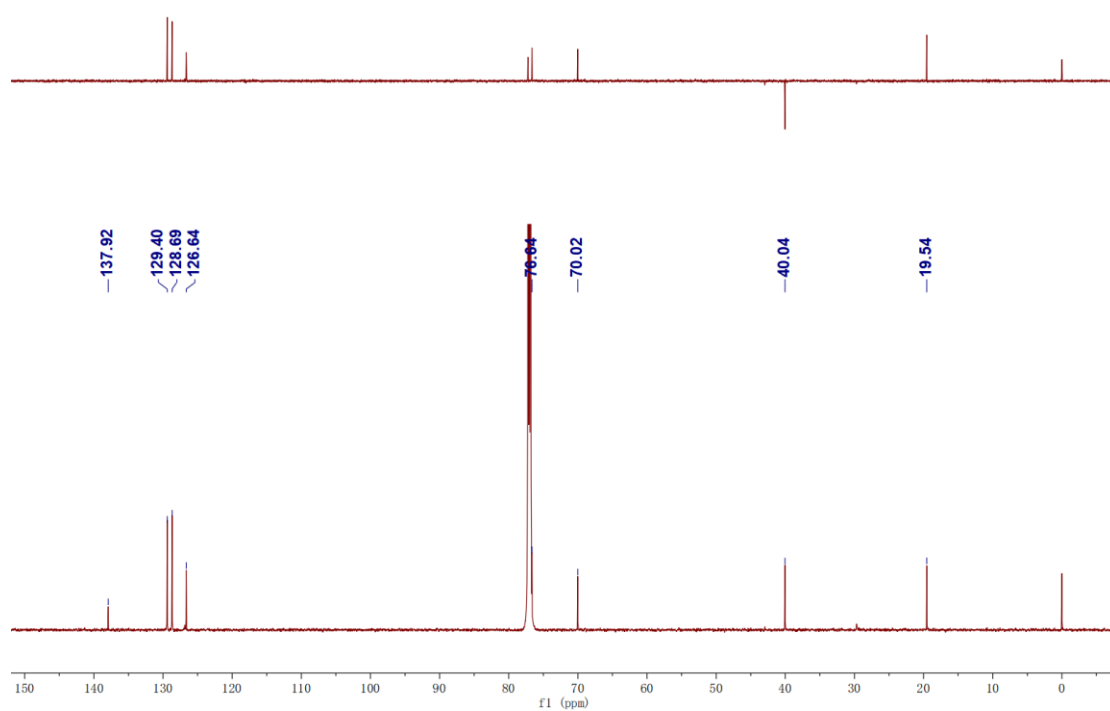

**Fig. S84 ESI-MS spectrum of compound 15**

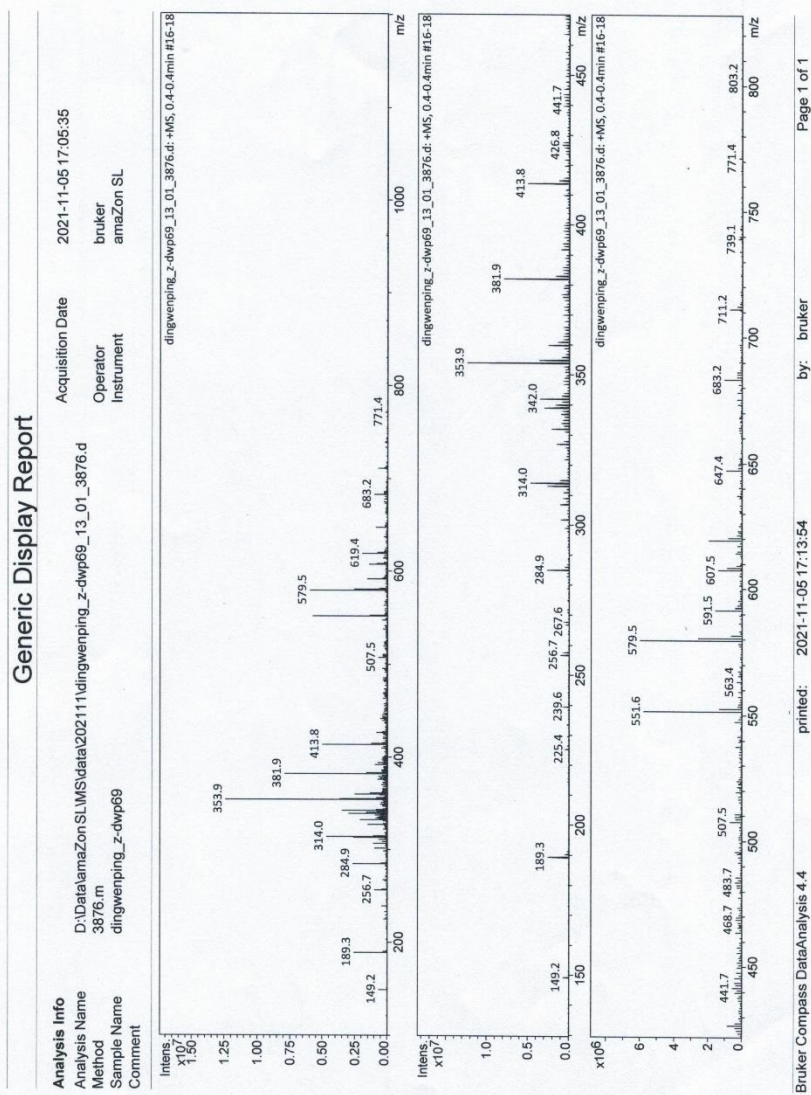



**Fig. S85**  $^1\text{H}$  NMR spectrum ( $\text{CD}_3\text{Cl}$ , 700 MHz) of compound **15**

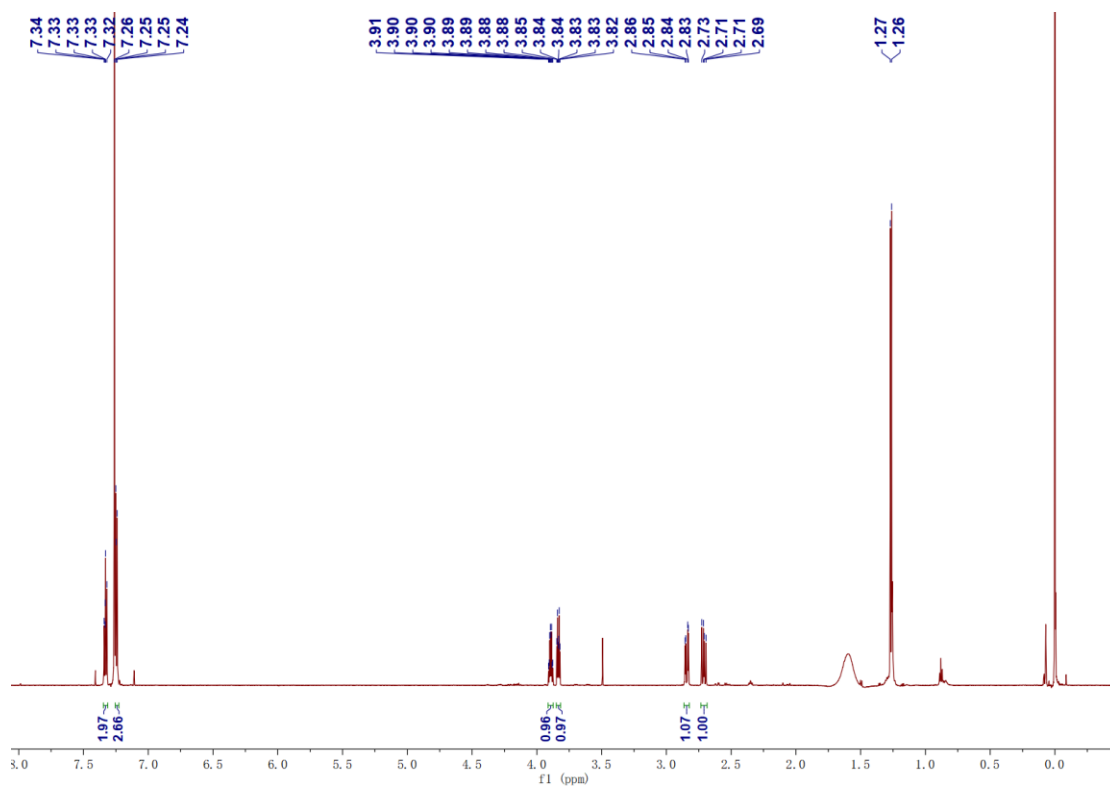

**Fig. S86**  $^{13}\text{C}$  NMR spectrum ( $\text{CD}_3\text{Cl}$ , 176 MHz) of compound **15**

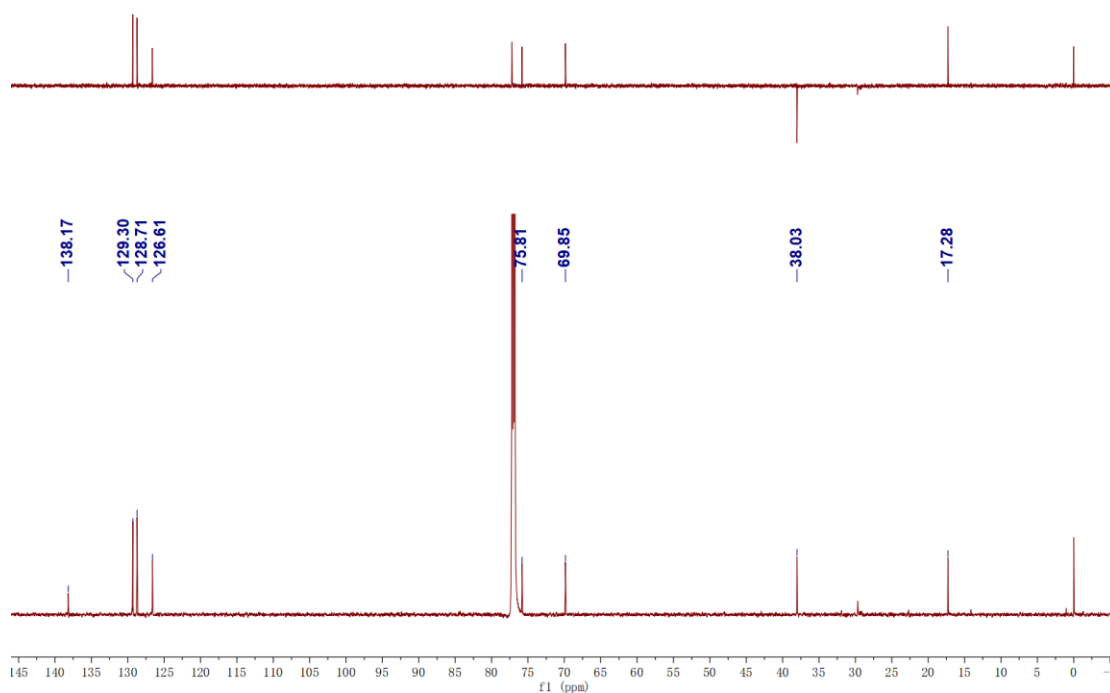



**Fig. S87** ESI-MS spectrum of compound **16**

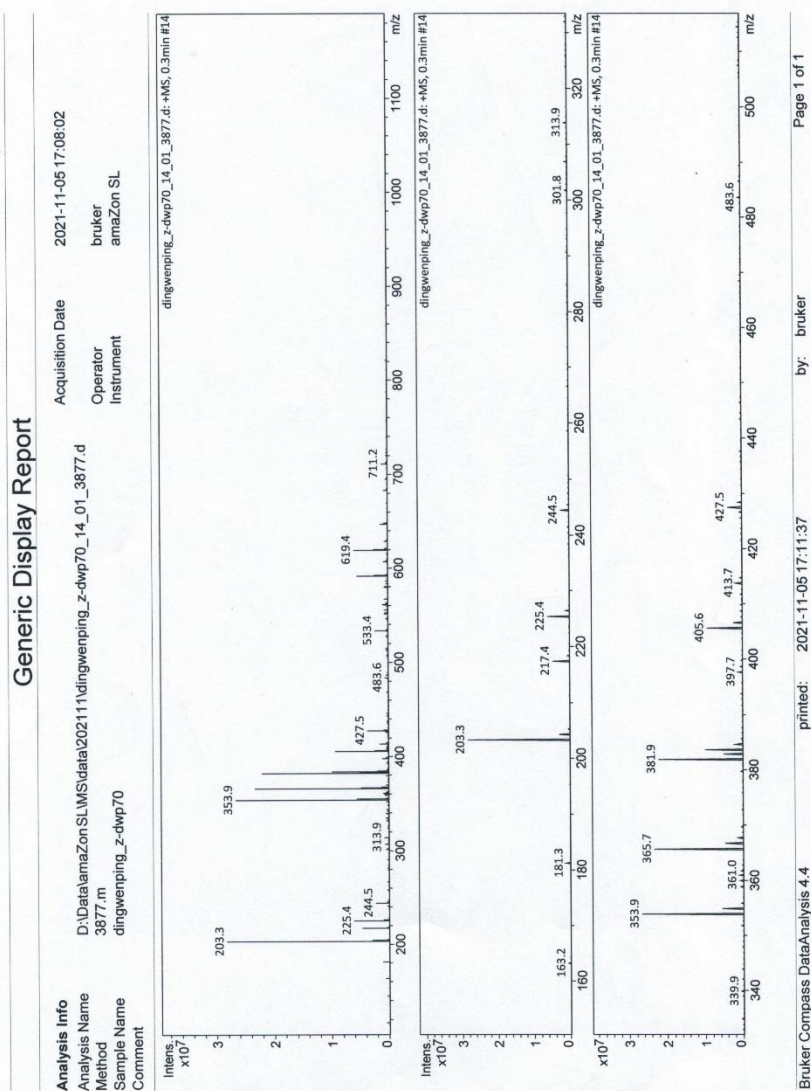

**Fig. S88**  $^1\text{H}$  NMR spectrum ( $\text{CD}_3\text{OD}$ , 700 MHz) of compound **16**

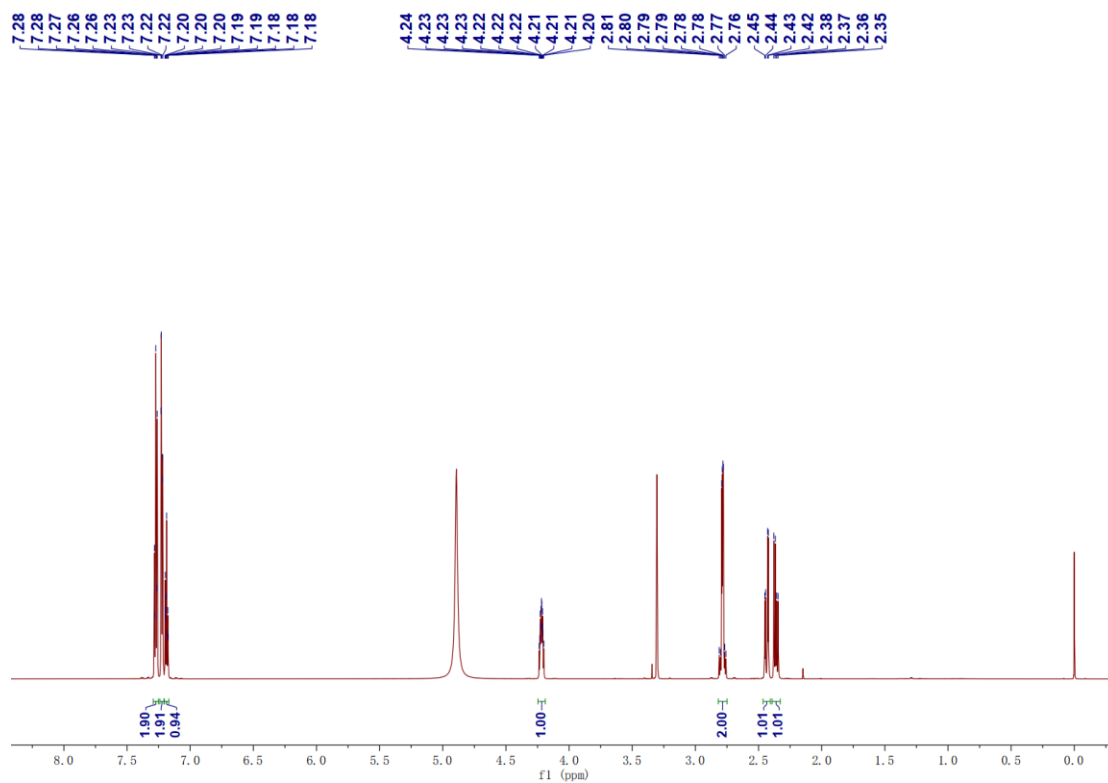

**Fig. S89**  $^{13}\text{C}$  NMR spectrum ( $\text{CD}_3\text{OD}$ , 176 MHz) of compound **16**

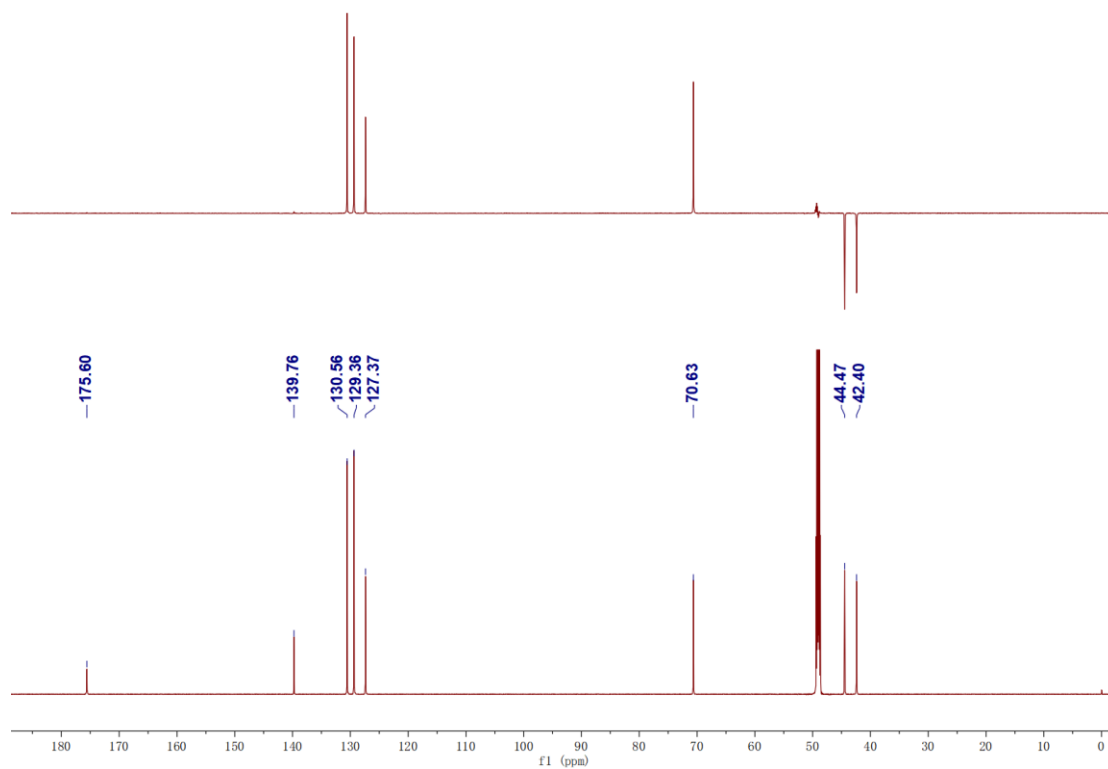

**Fig. S90 ESI-MS spectrum of compound 17**

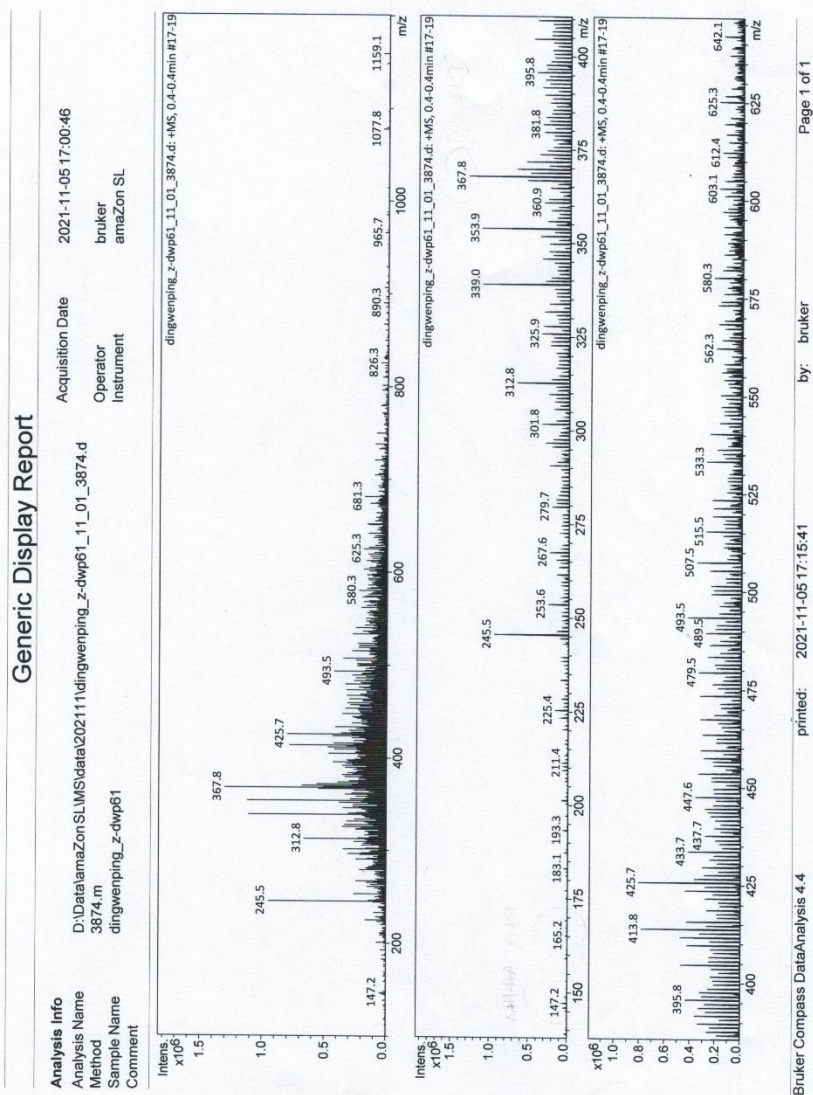

**Fig. S91**  $^1\text{H}$  NMR spectrum ( $\text{CD}_3\text{OD}$ , 700 MHz) of compound **17**

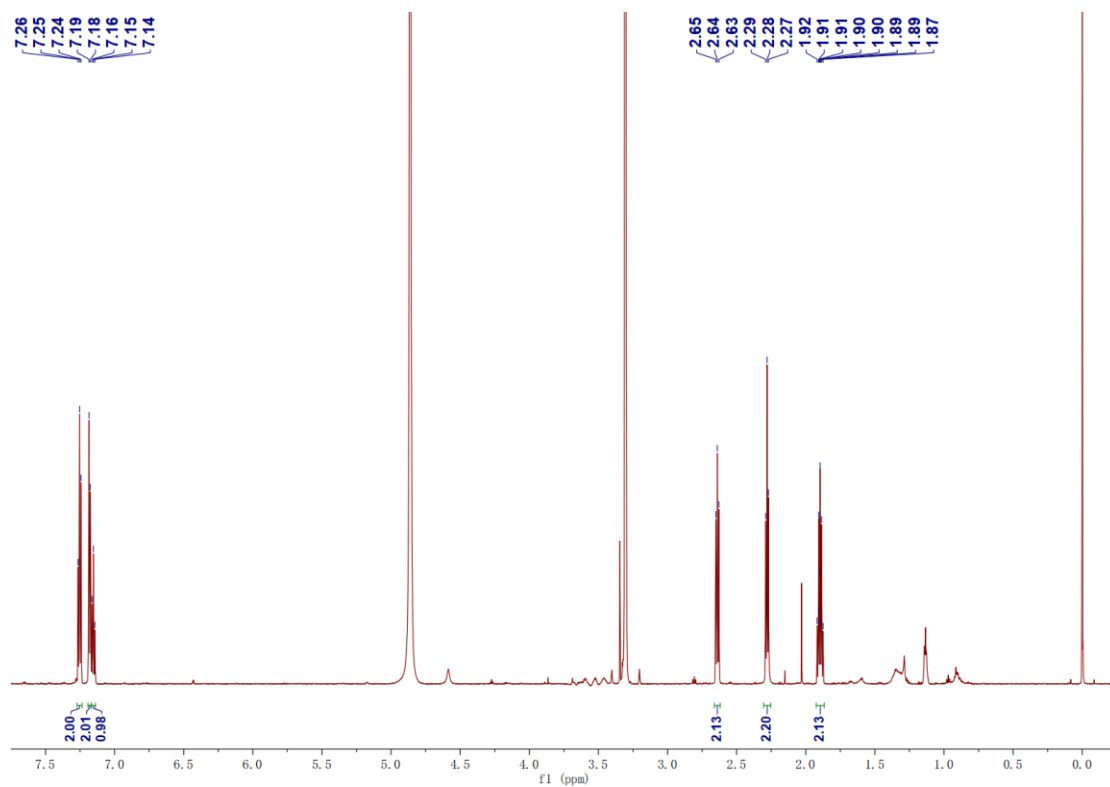

**Fig. S92**  $^{13}\text{C}$  NMR spectrum ( $\text{CD}_3\text{OD}$ , 176 MHz) of compound **17**

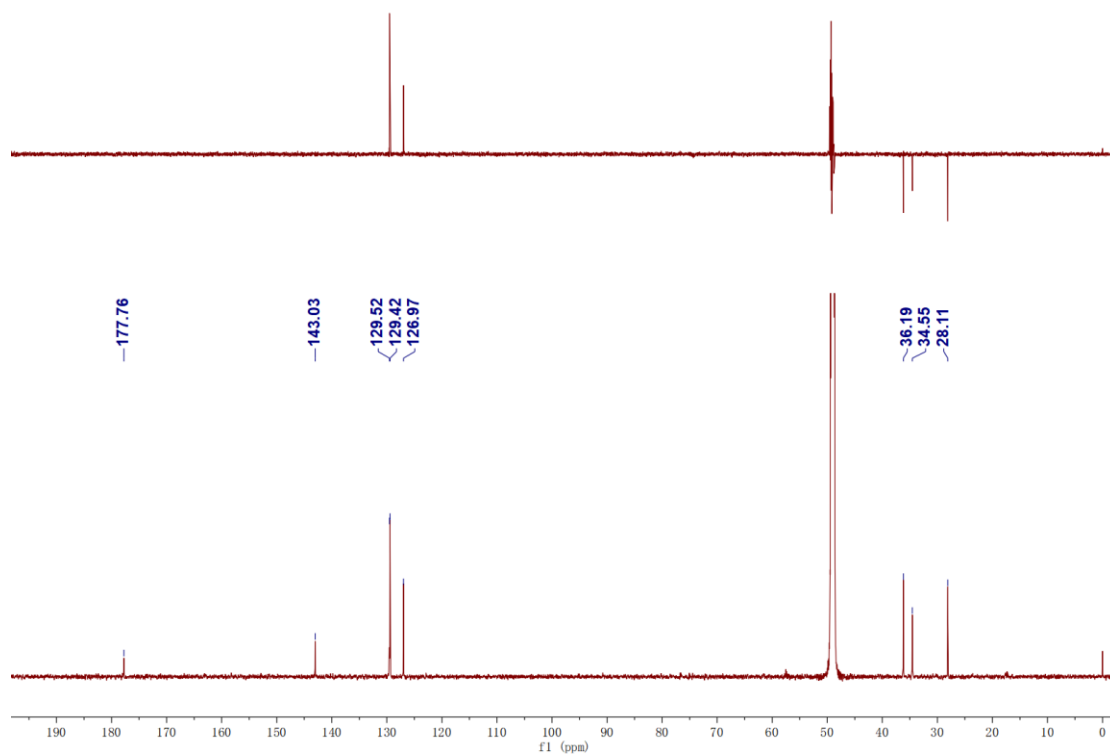

Fig. S93 ESI-MS spectrum of compound 18

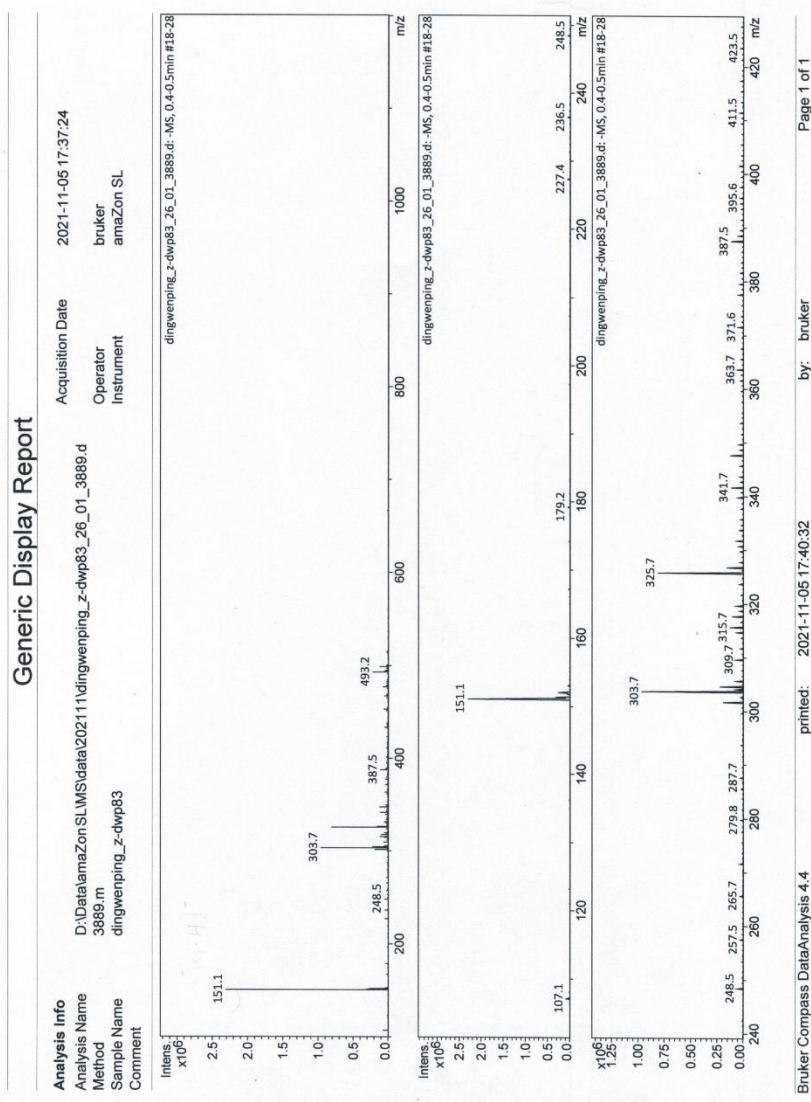

**Fig. S94**  $^1\text{H}$  NMR spectrum ( $\text{CD}_3\text{OD}$ , 500 MHz) of compound **18**

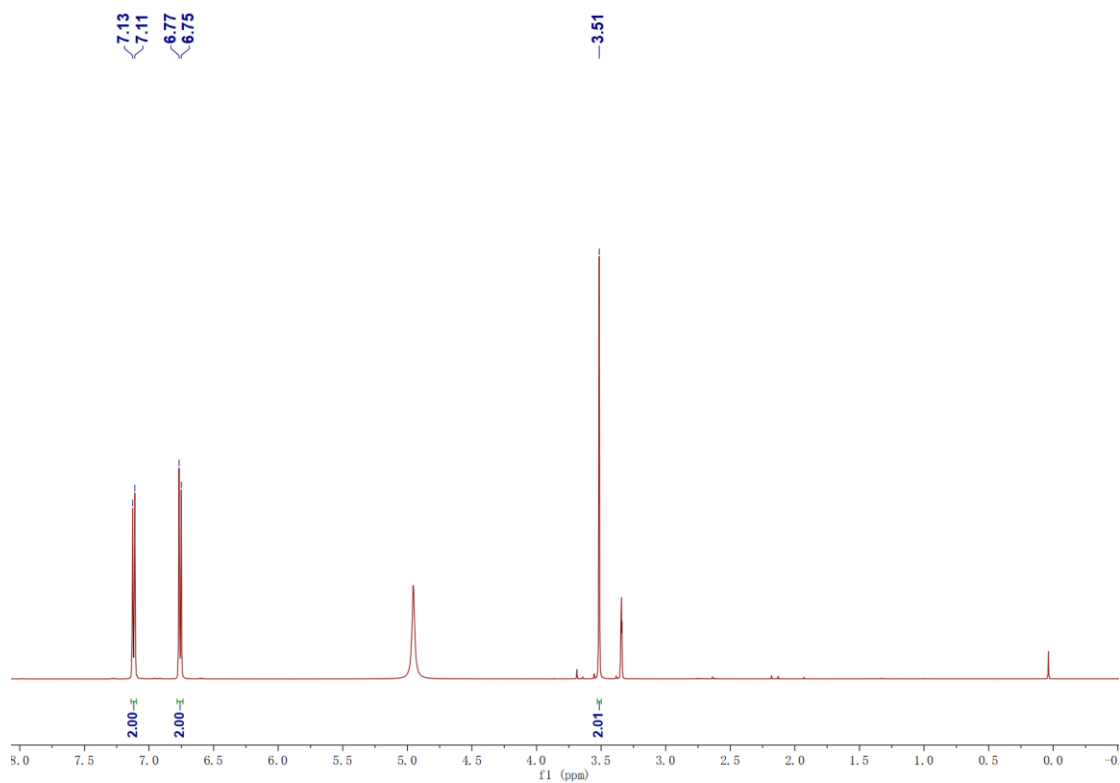

**Fig. S95**  $^{13}\text{C}$  NMR spectrum ( $\text{CD}_3\text{OD}$ , 126 MHz) of compound **18**

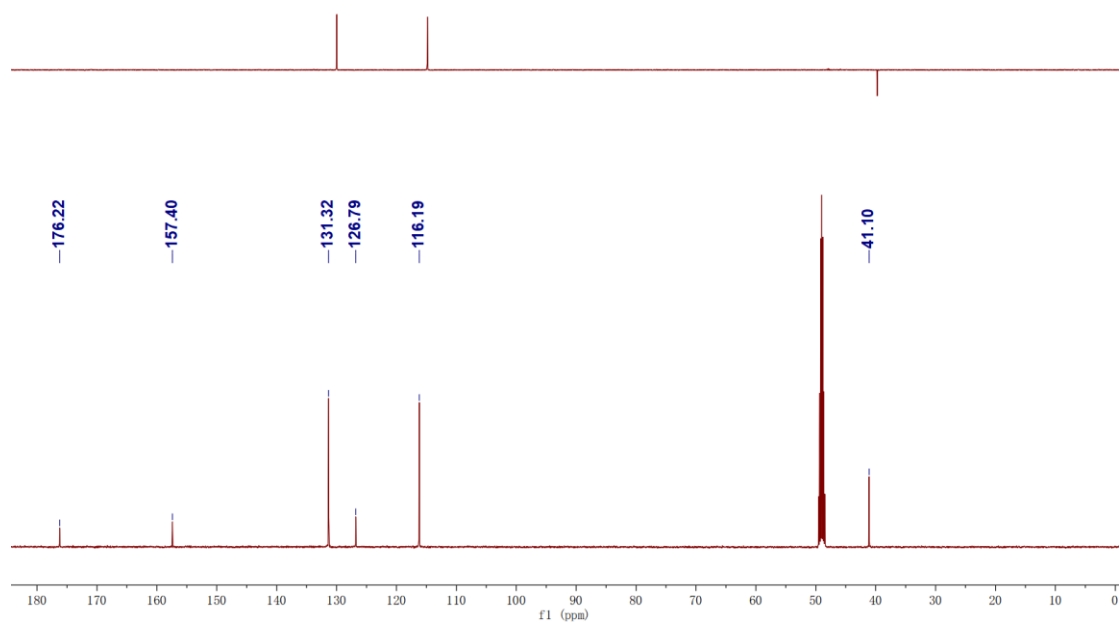



**Fig. S96 ESI-MS spectrum of compound 19**

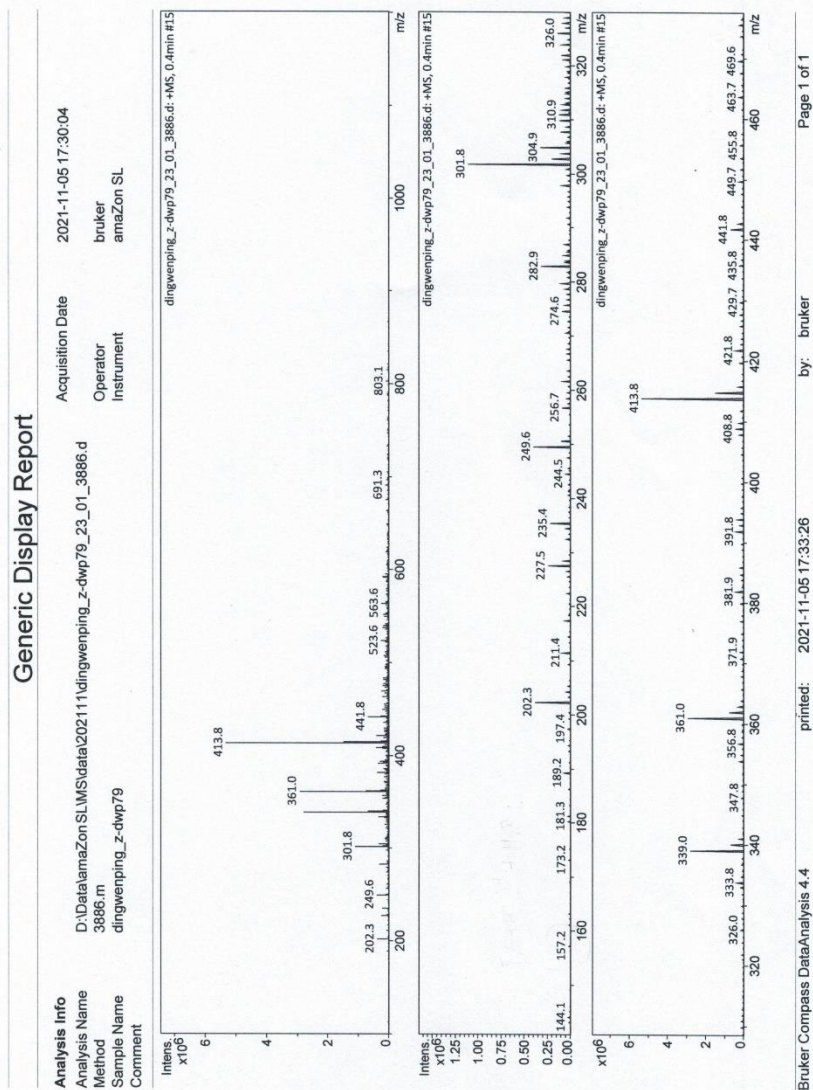

**Fig. S97**  $^1\text{H}$  NMR spectrum ( $\text{CD}_3\text{OD}$ , 500 MHz) of compound **19**

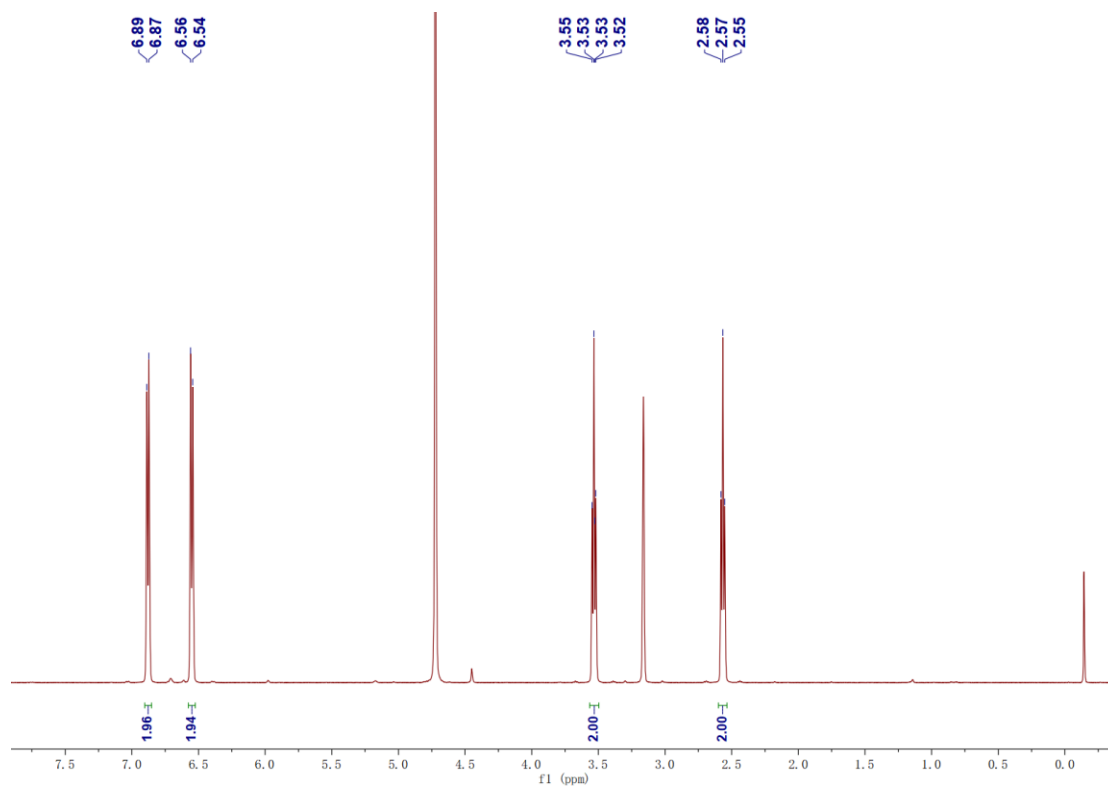

**Fig. S98**  $^{13}\text{C}$  NMR spectrum ( $\text{CD}_3\text{OD}$ , 126 MHz) of compound **19**

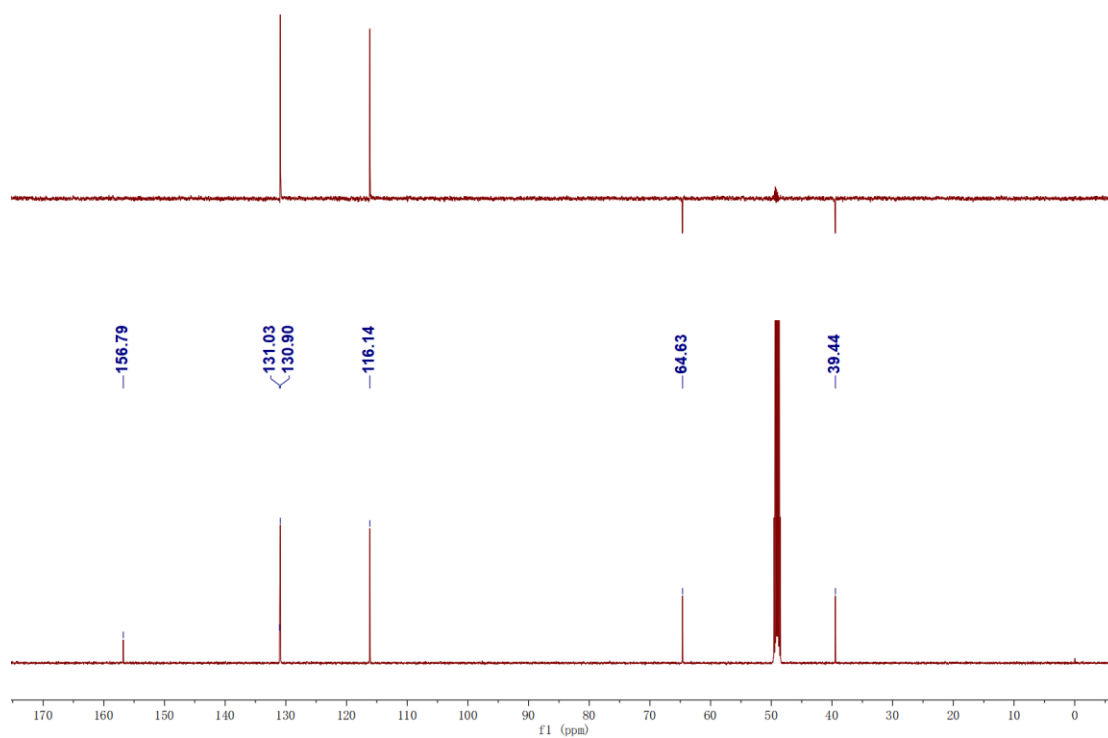



**Fig. S99** ESI-MS spectrum of compound **20**

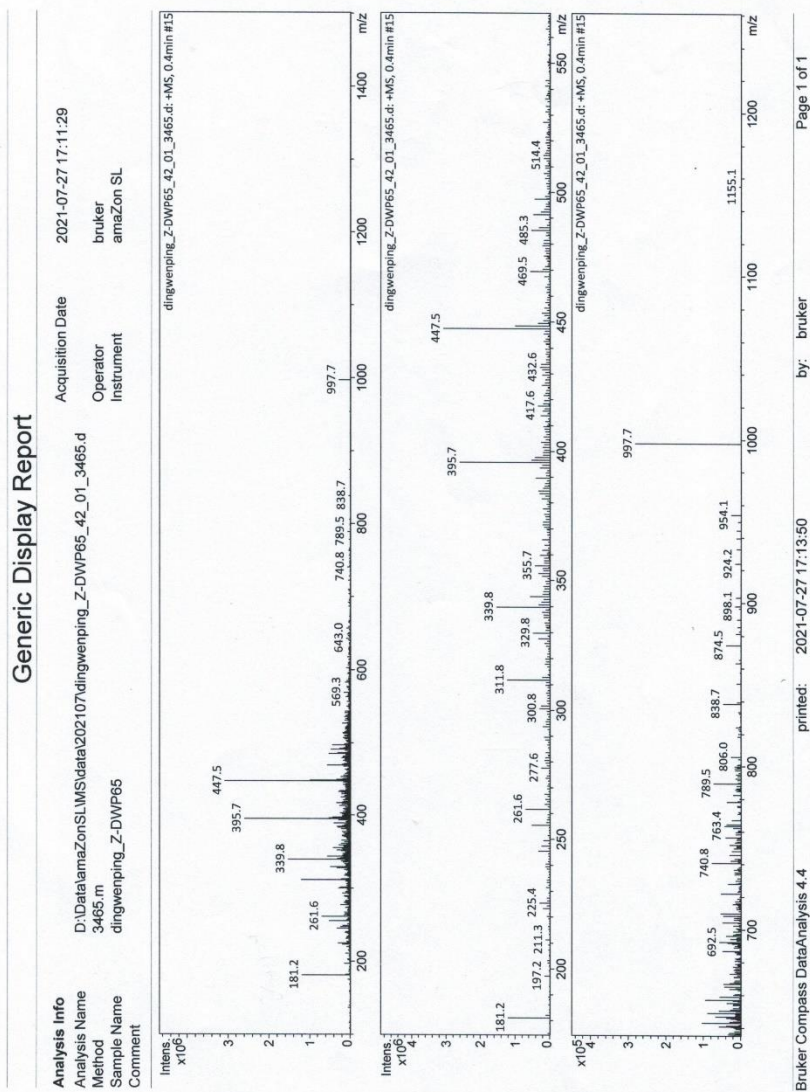

**Fig. S100**  $^1\text{H}$  NMR spectrum ( $\text{CD}_3\text{OD}$ , 500 MHz) of compound **20**

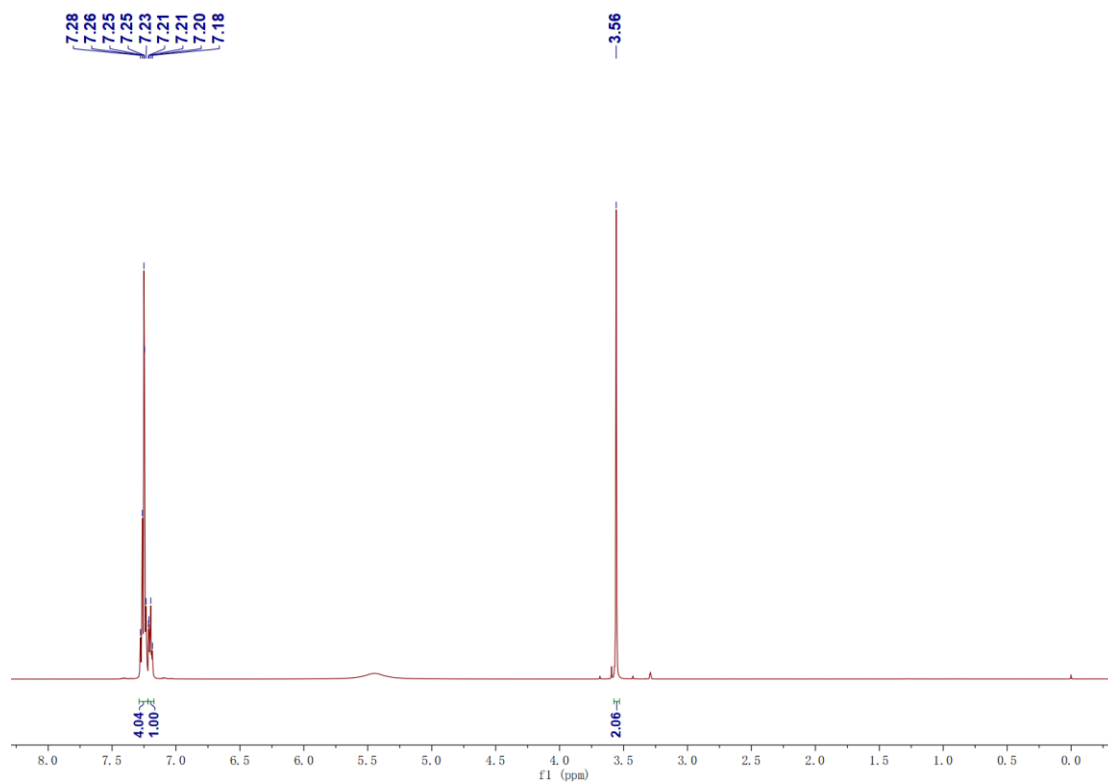

**Fig. S101**  $^{13}\text{C}$  NMR spectrum ( $\text{CD}_3\text{OD}$ , 126 MHz) of compound **20**

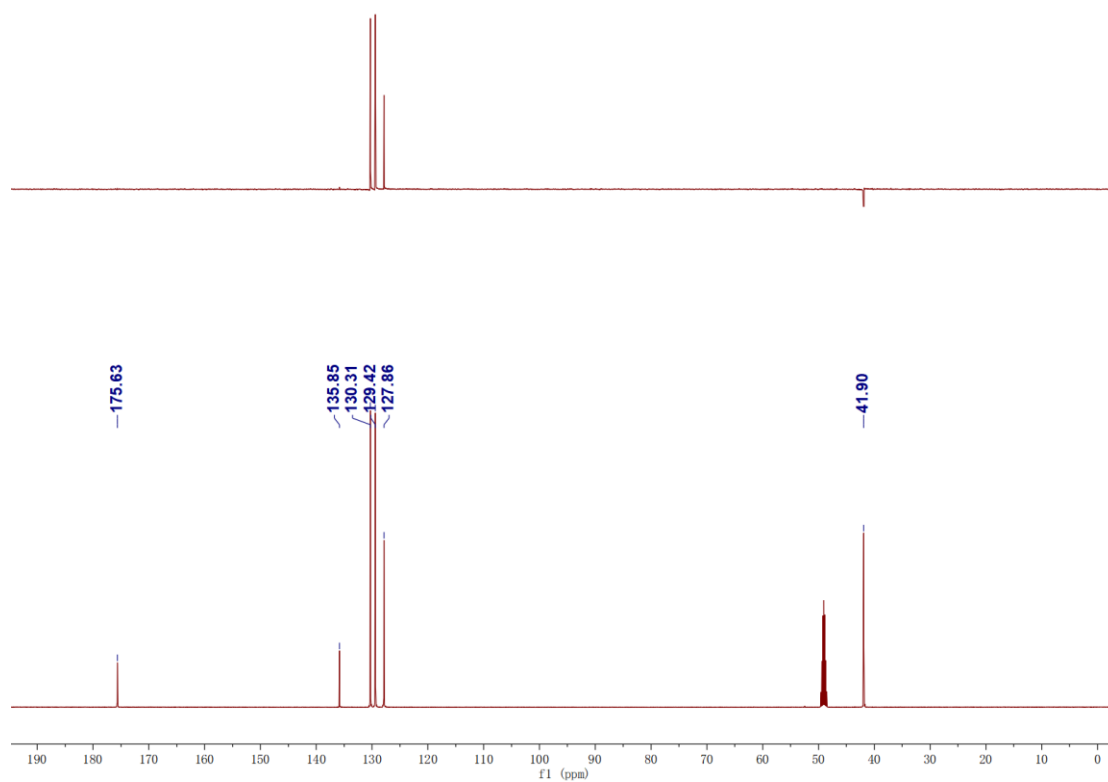

Fig. S102 ESI-MS spectrum of compound 21

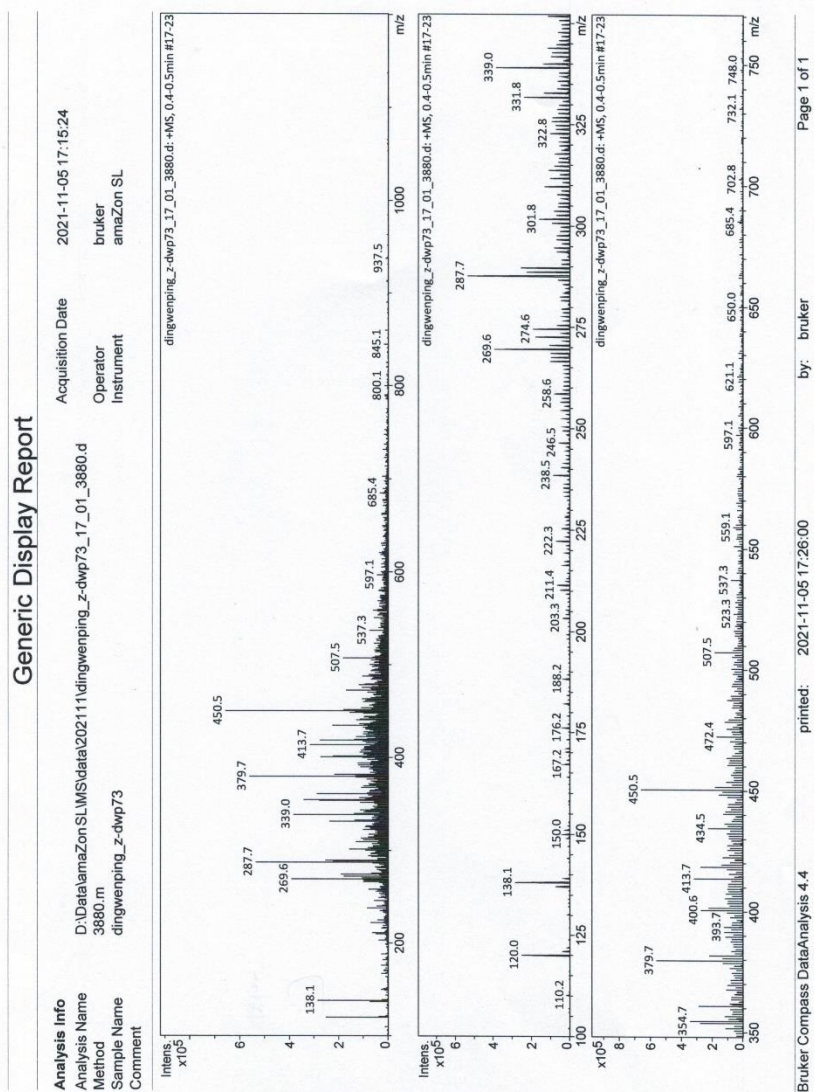

**Fig. S103**  $^1\text{H}$  NMR spectrum ( $\text{CD}_3\text{OD}$ , 500 MHz) of compound **21**

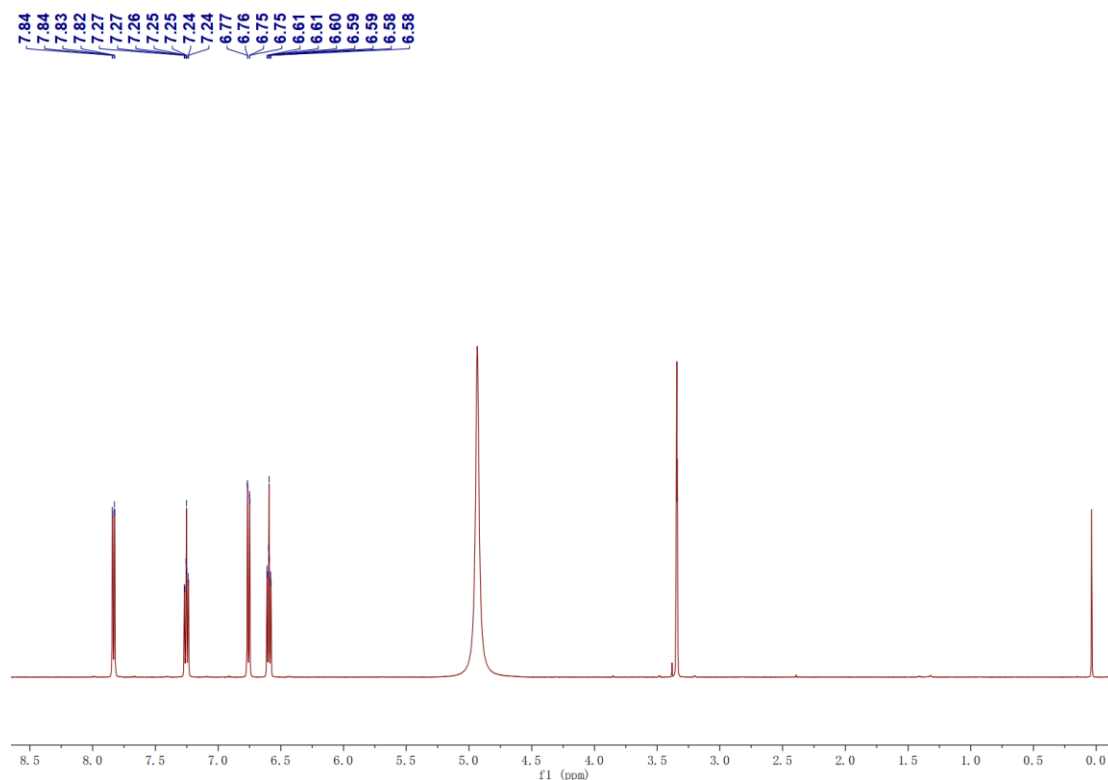

**Fig. S104**  $^{13}\text{C}$  NMR spectrum ( $\text{CD}_3\text{OD}$ , 126 MHz) of compound **21**

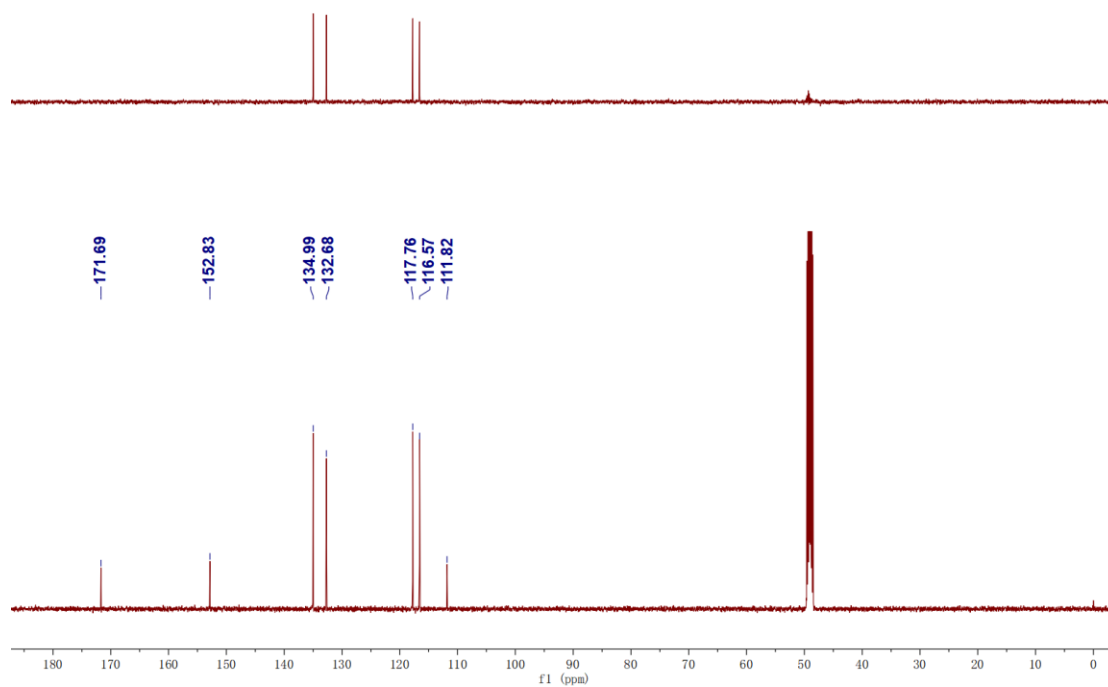

**Fig. S105 ESI-MS spectrum of compound 22**

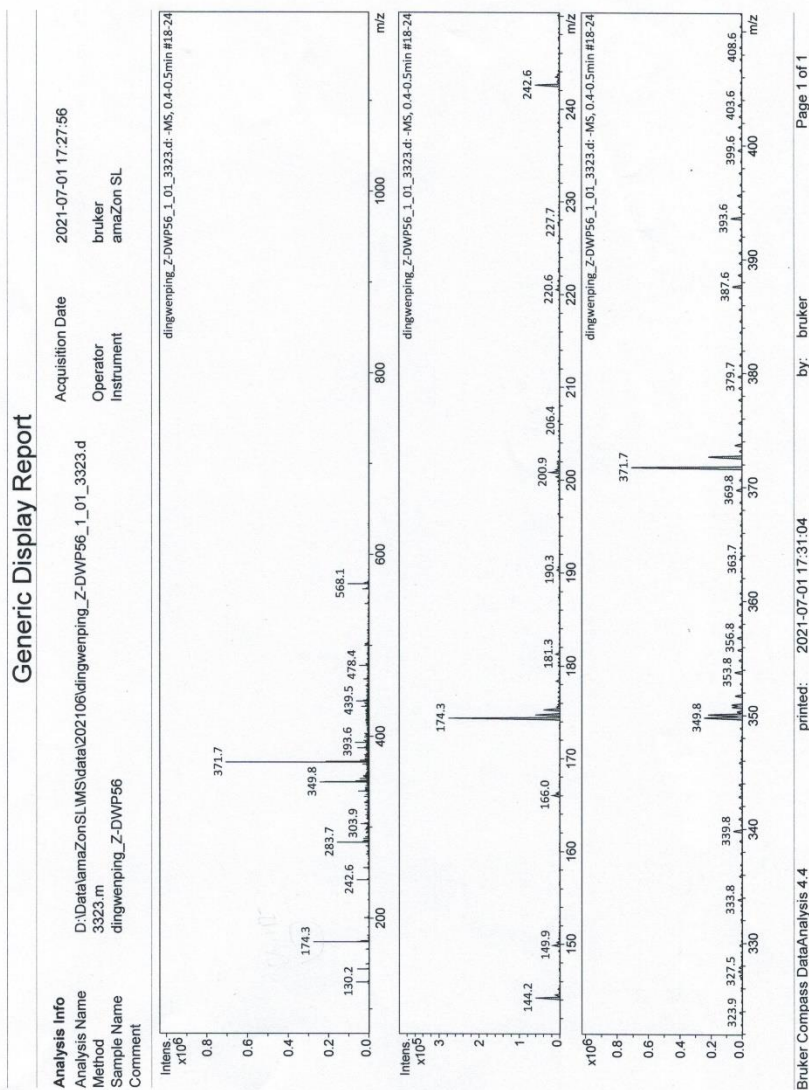

**Fig. S106**  $^1\text{H}$  NMR spectrum ( $\text{CD}_3\text{OD}$ , 700 MHz) of compound **22**

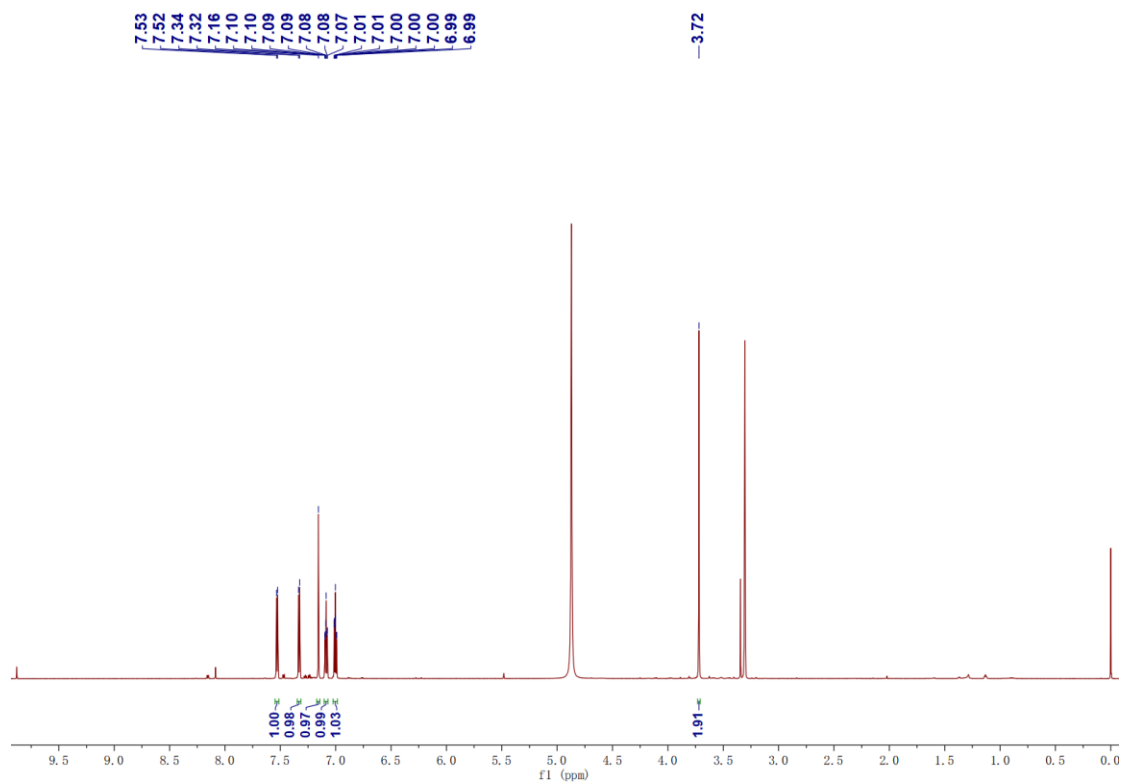

**Fig. S107**  $^{13}\text{C}$  NMR spectrum ( $\text{CD}_3\text{OD}$ , 176 MHz) of compound **22**

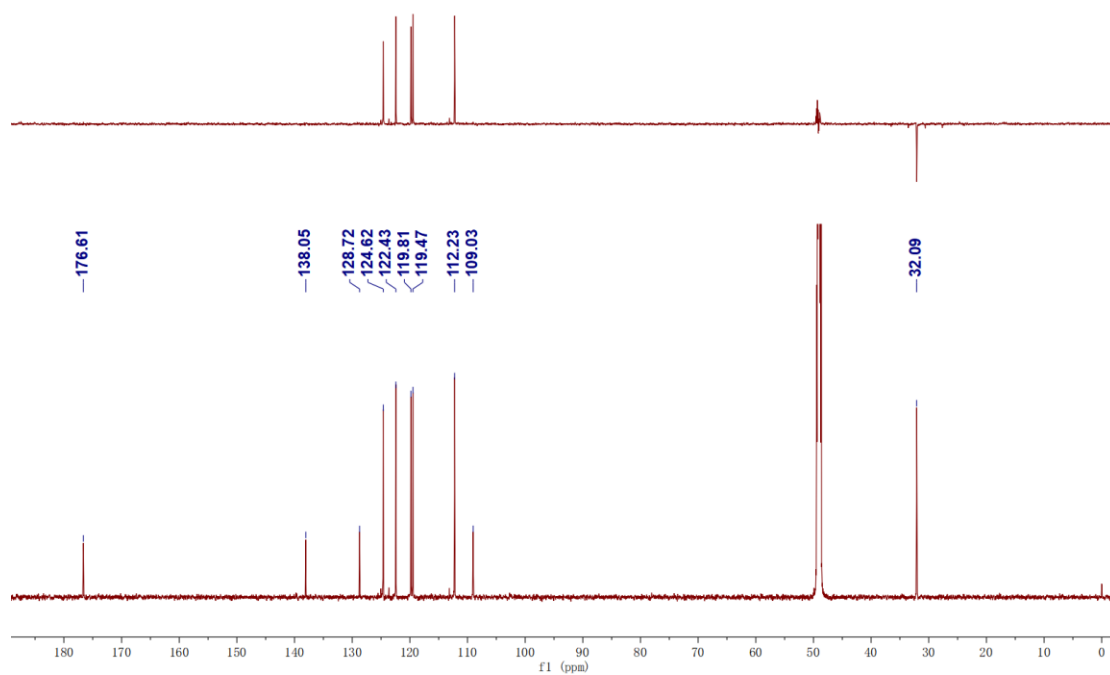

**Fig. S108** ESI-MS spectrum of compound **23**

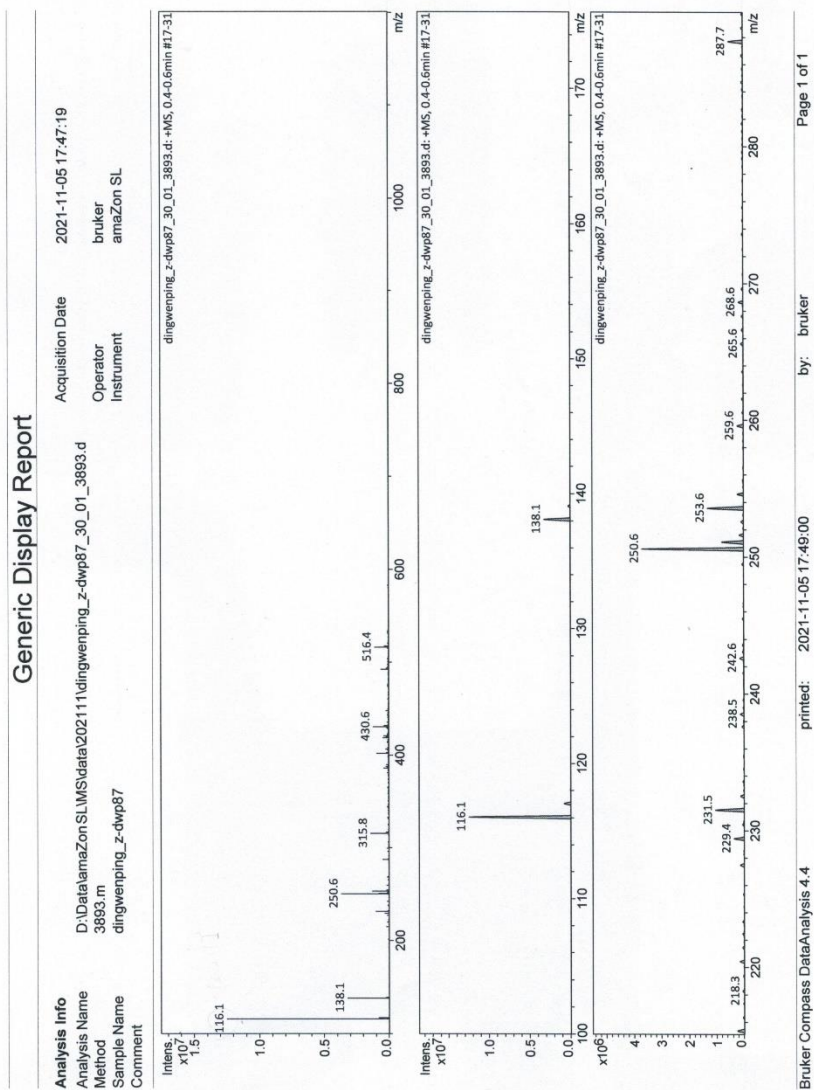

**Fig. S109**  $^1\text{H}$  NMR spectrum ( $\text{CD}_3\text{OD}$ , 500 MHz) of compound **23**

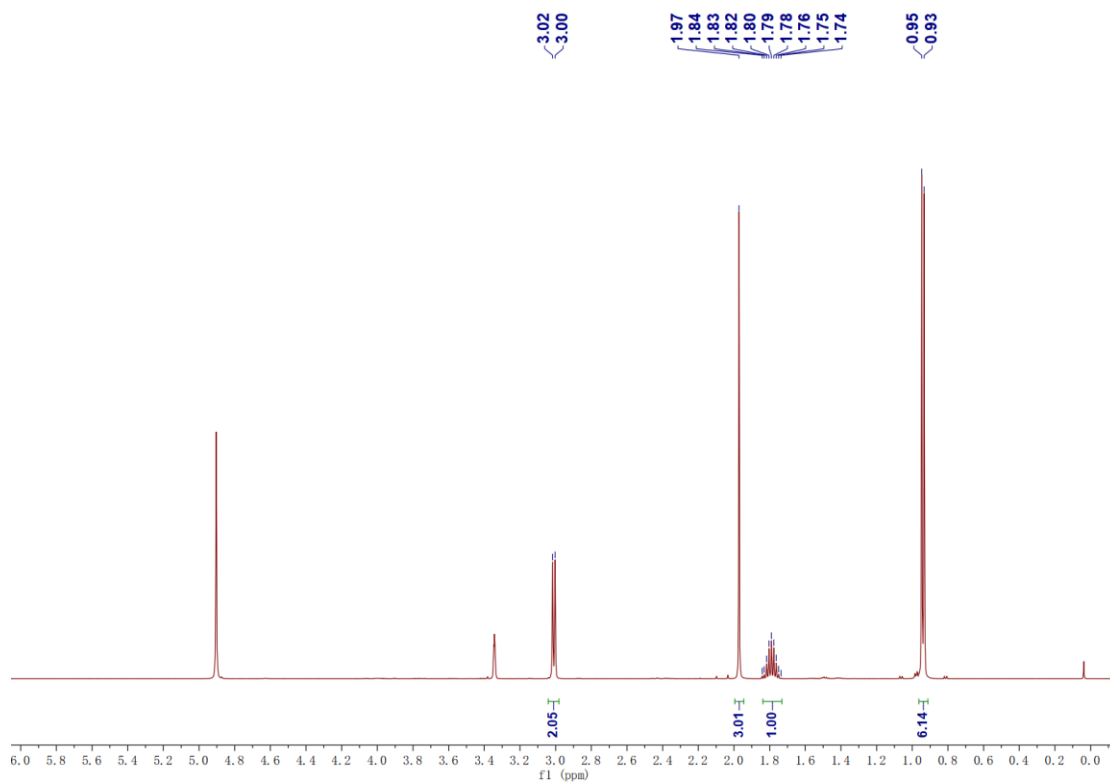

**Fig. S110**  $^{13}\text{C}$  NMR spectrum ( $\text{CD}_3\text{OD}$ , 126 MHz) of compound **23**

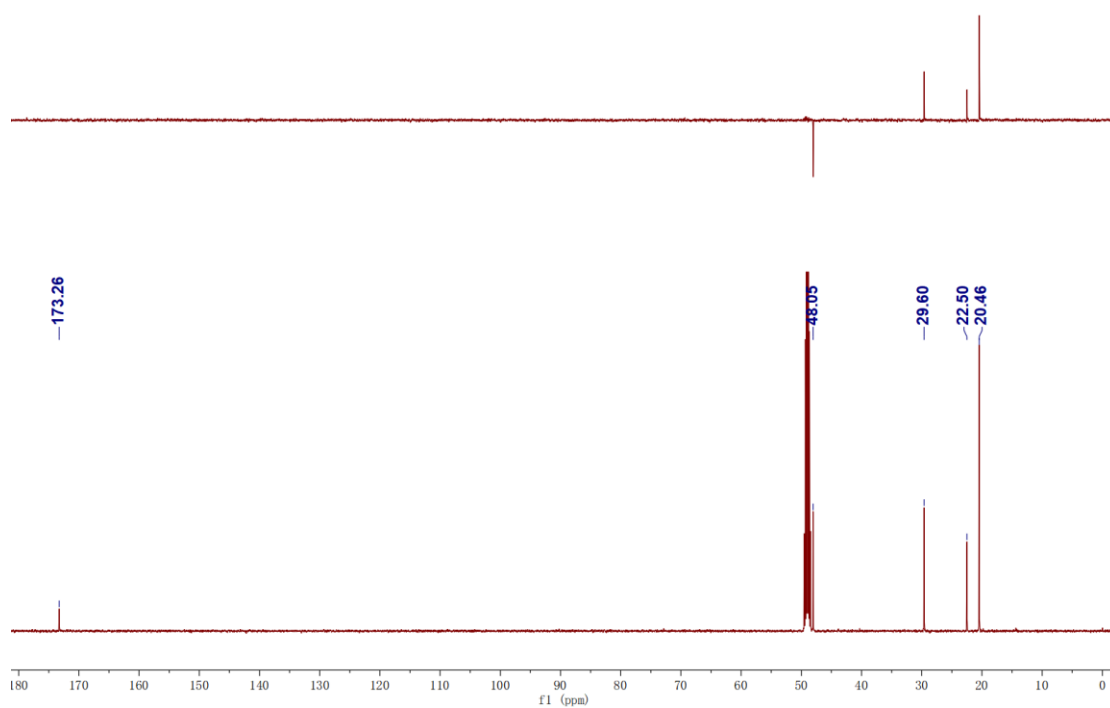



**Fig. S111** Integrated cluster-node diagram of Molecular Networking

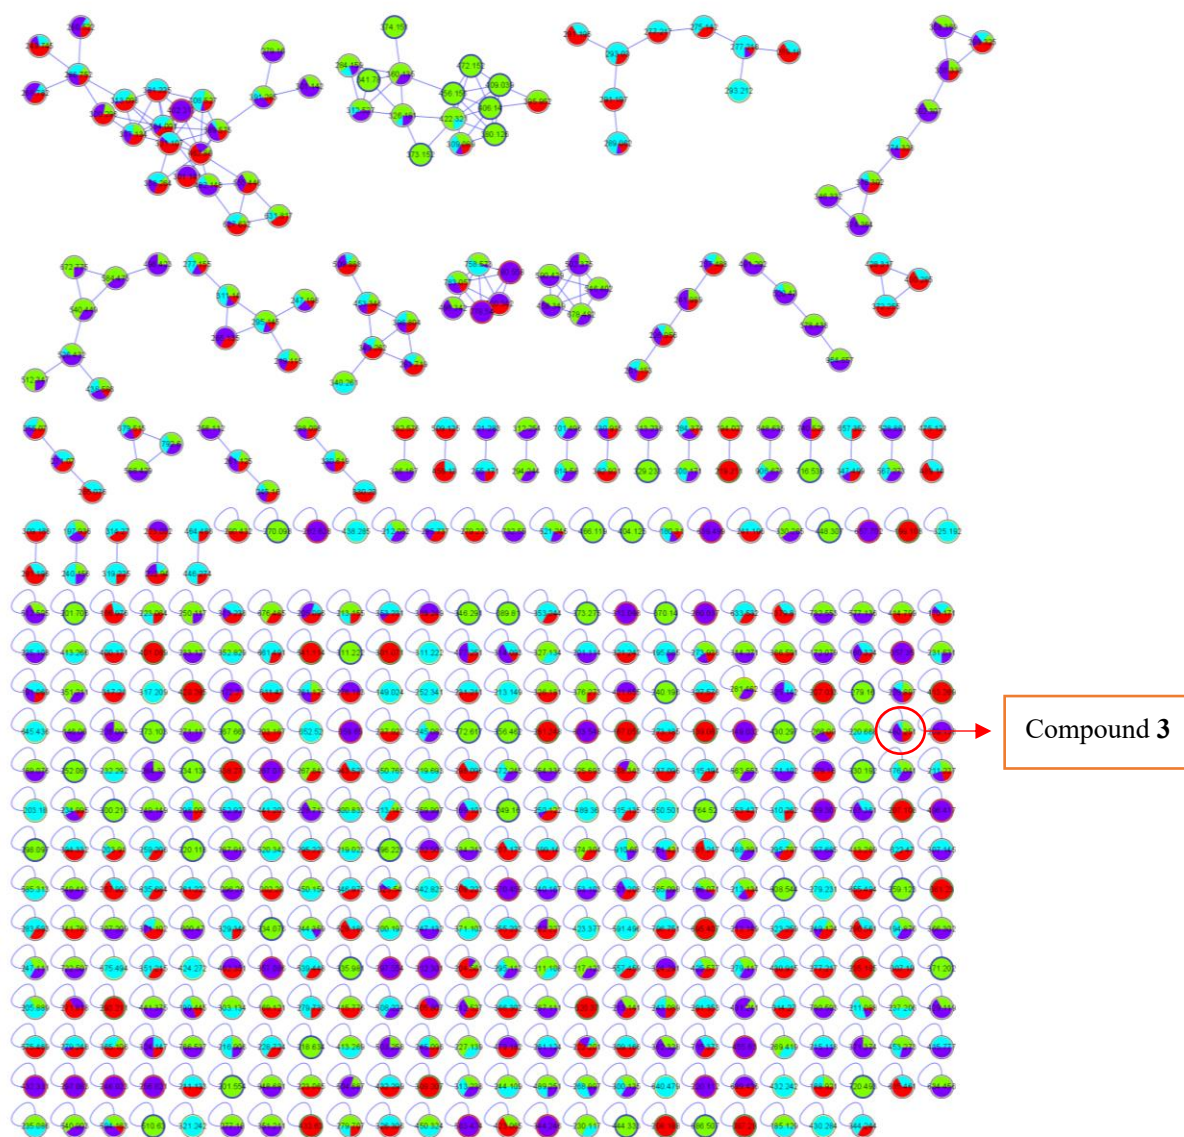

Supplement: s1 [file s1]
